# Supplementary material
Source: bioRxiv or medRxiv preprint supplement (https://medrxiv.org/highwire/filestream/68620/field_highwire_adjunct_files/1/19003012-10.pdf)

sex: 1

Five-year mortality compared to 2001

$\ln(\text{HR})$

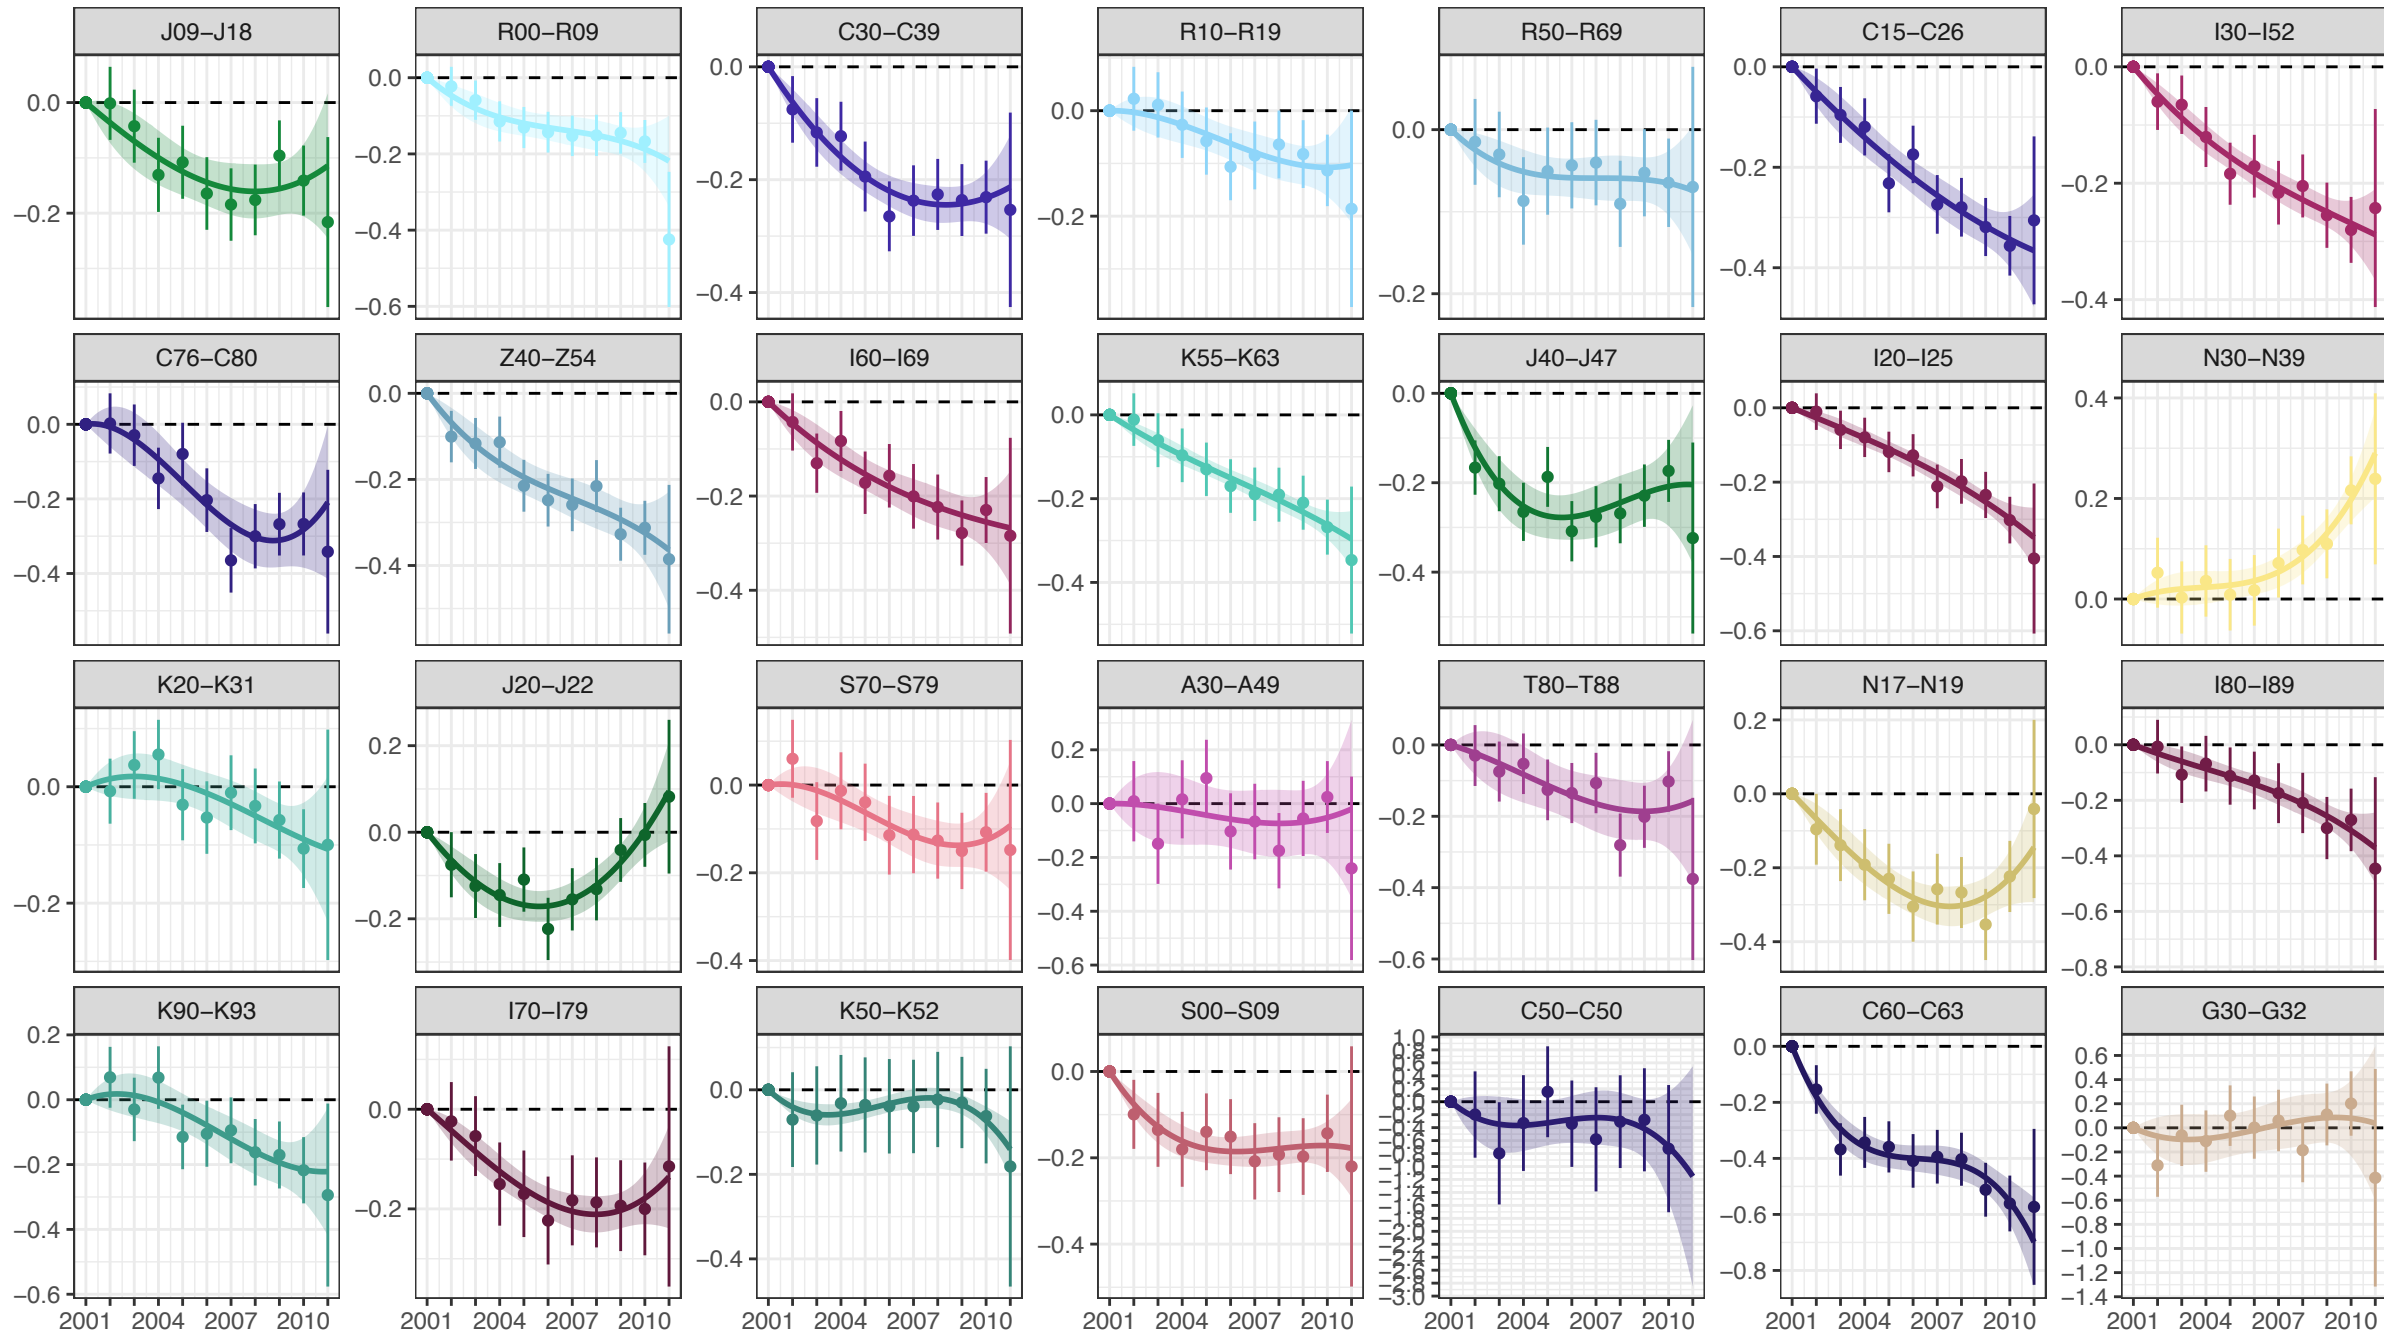

Year of hospital admission

sex: 2

Five-year mortality compared to 2001

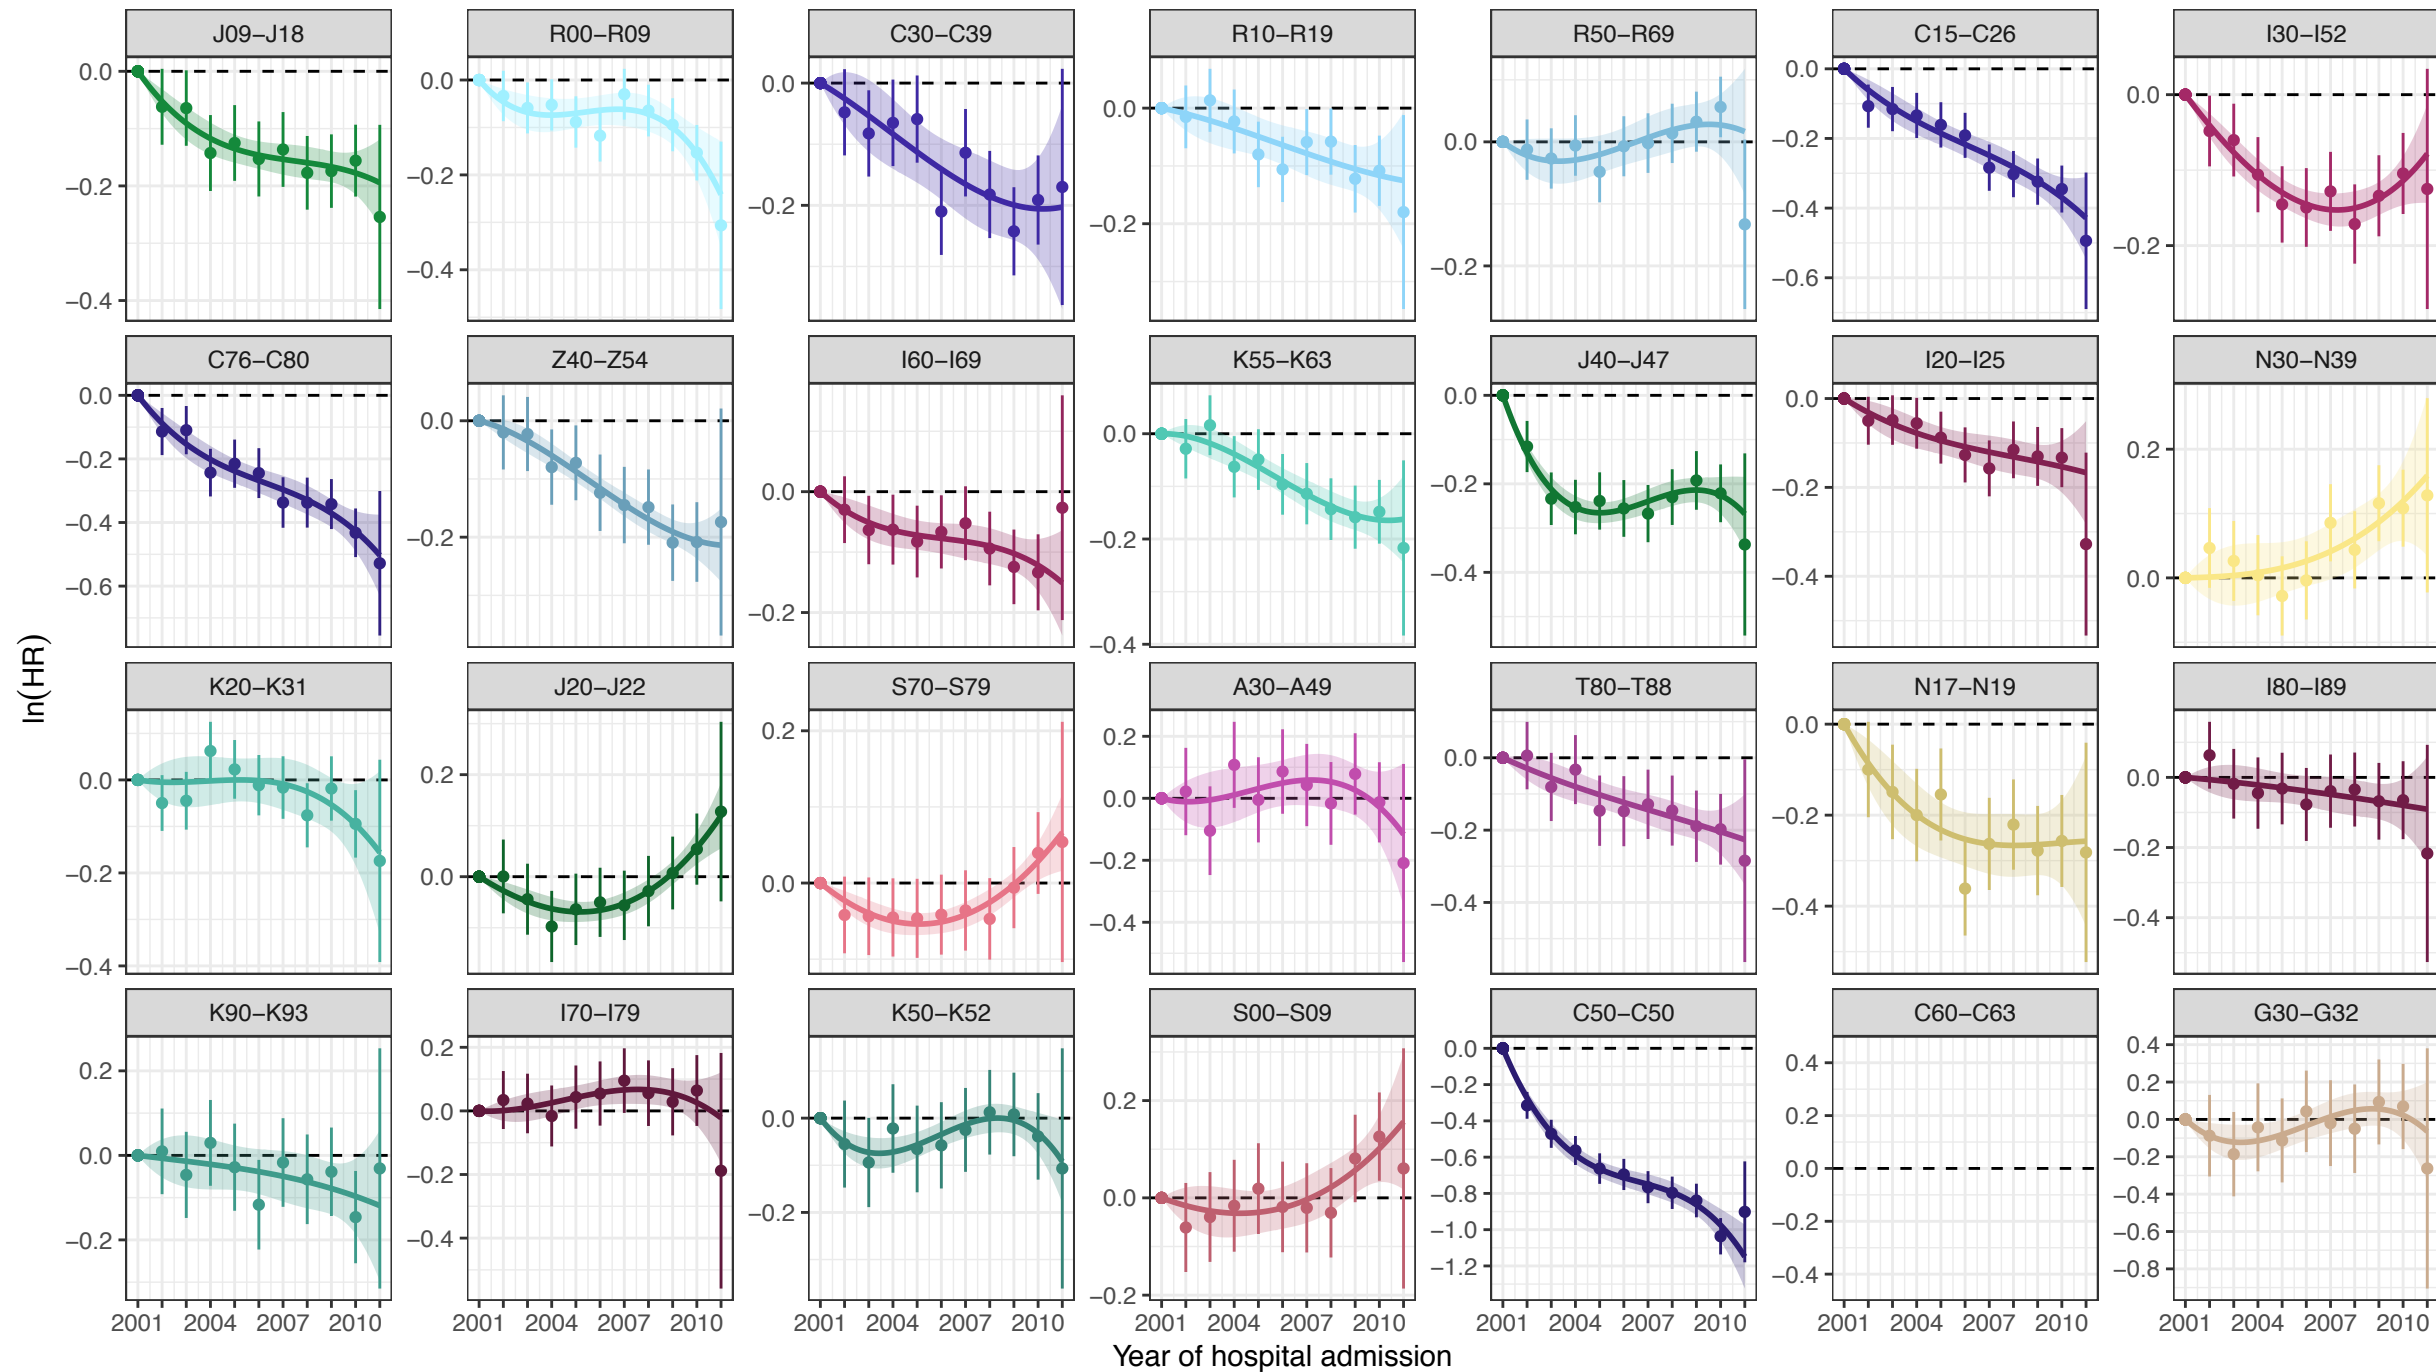

sex: 1

Five-year mortality compared to 2001

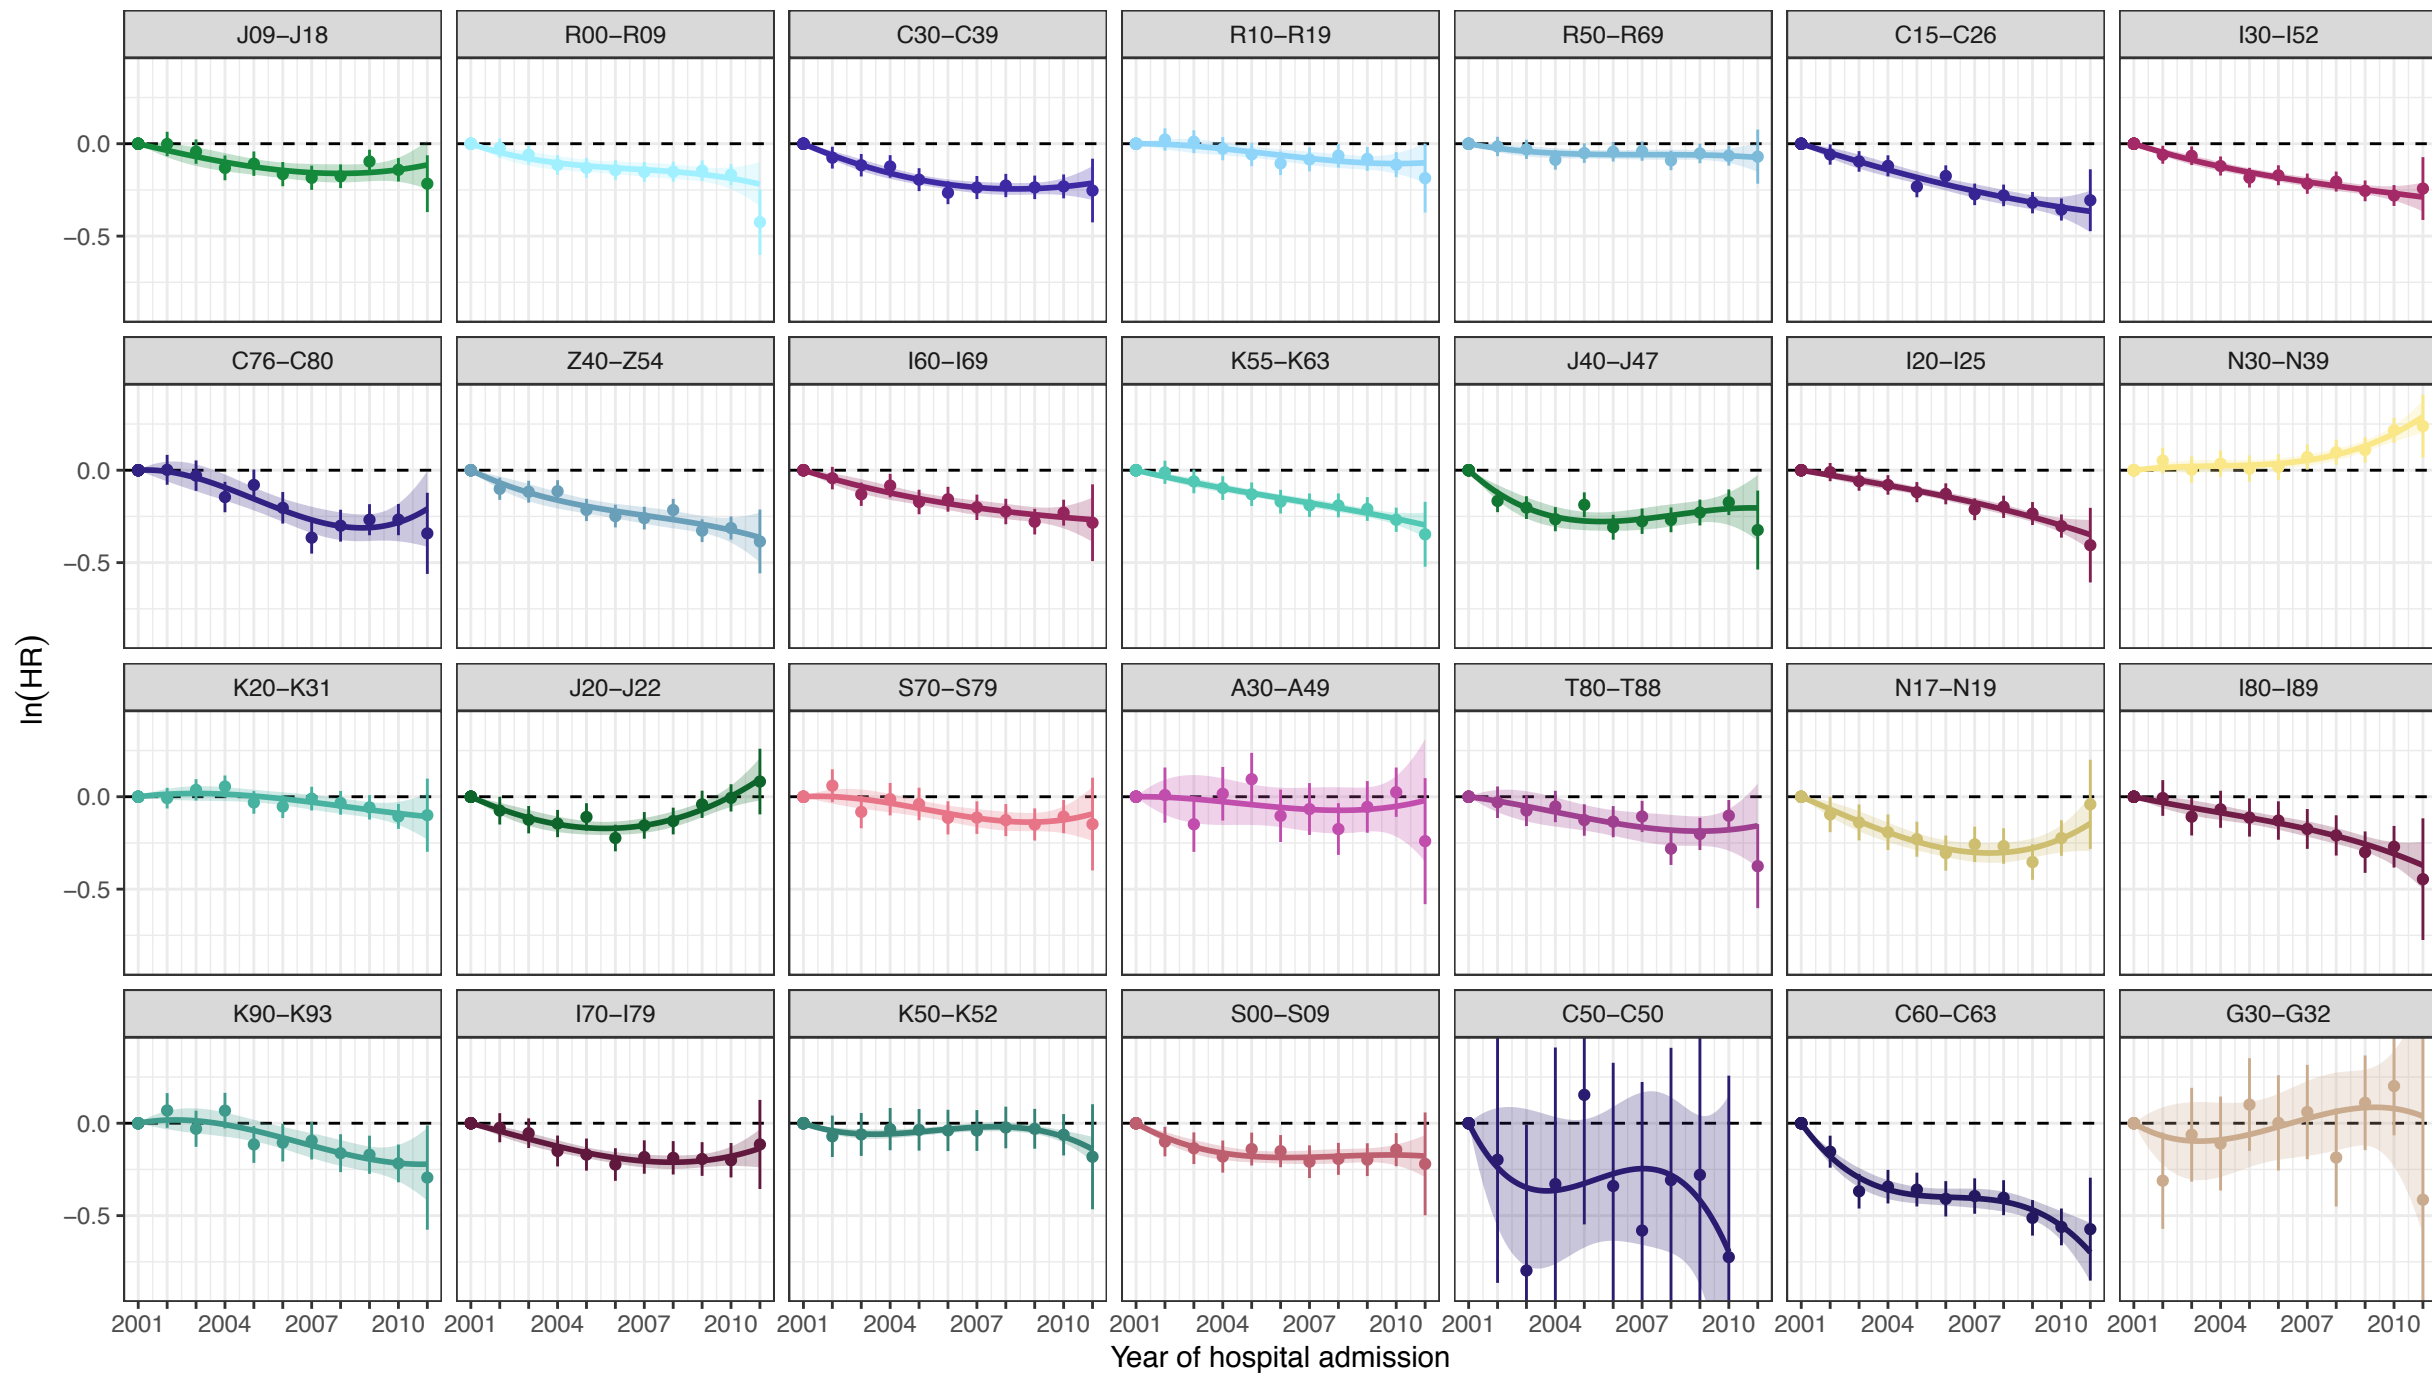

sex: 2

Five-year mortality compared to 2001

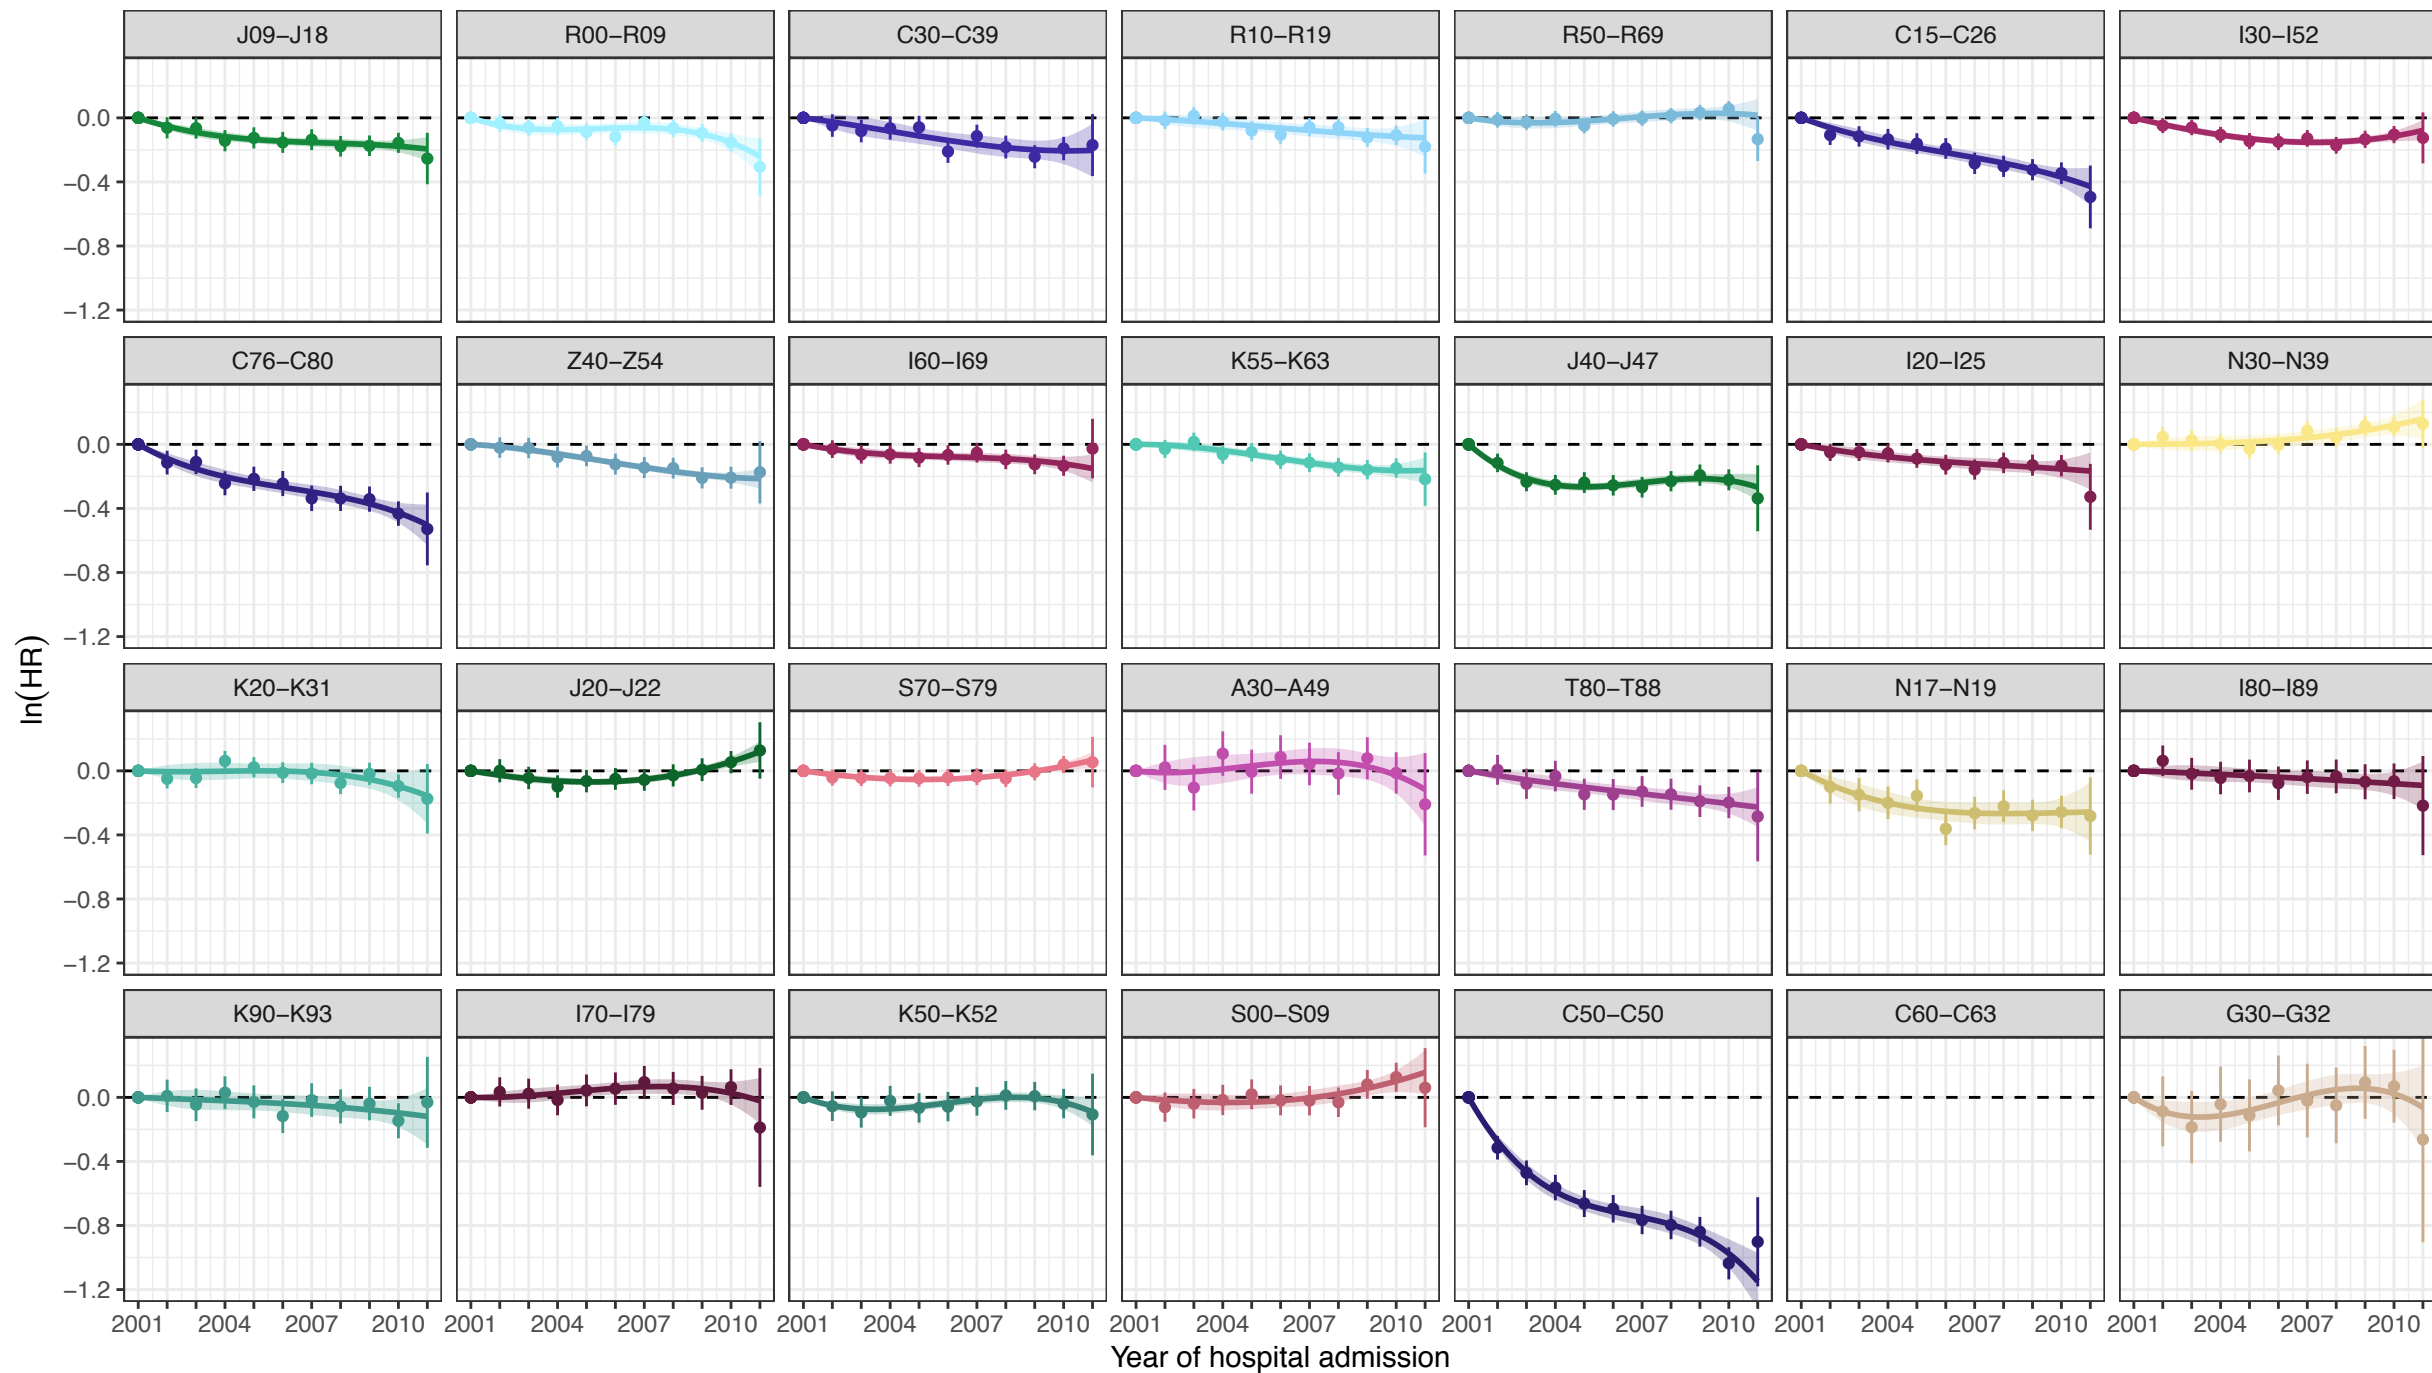

deprivation: 1

Five-year mortality compared to 2001

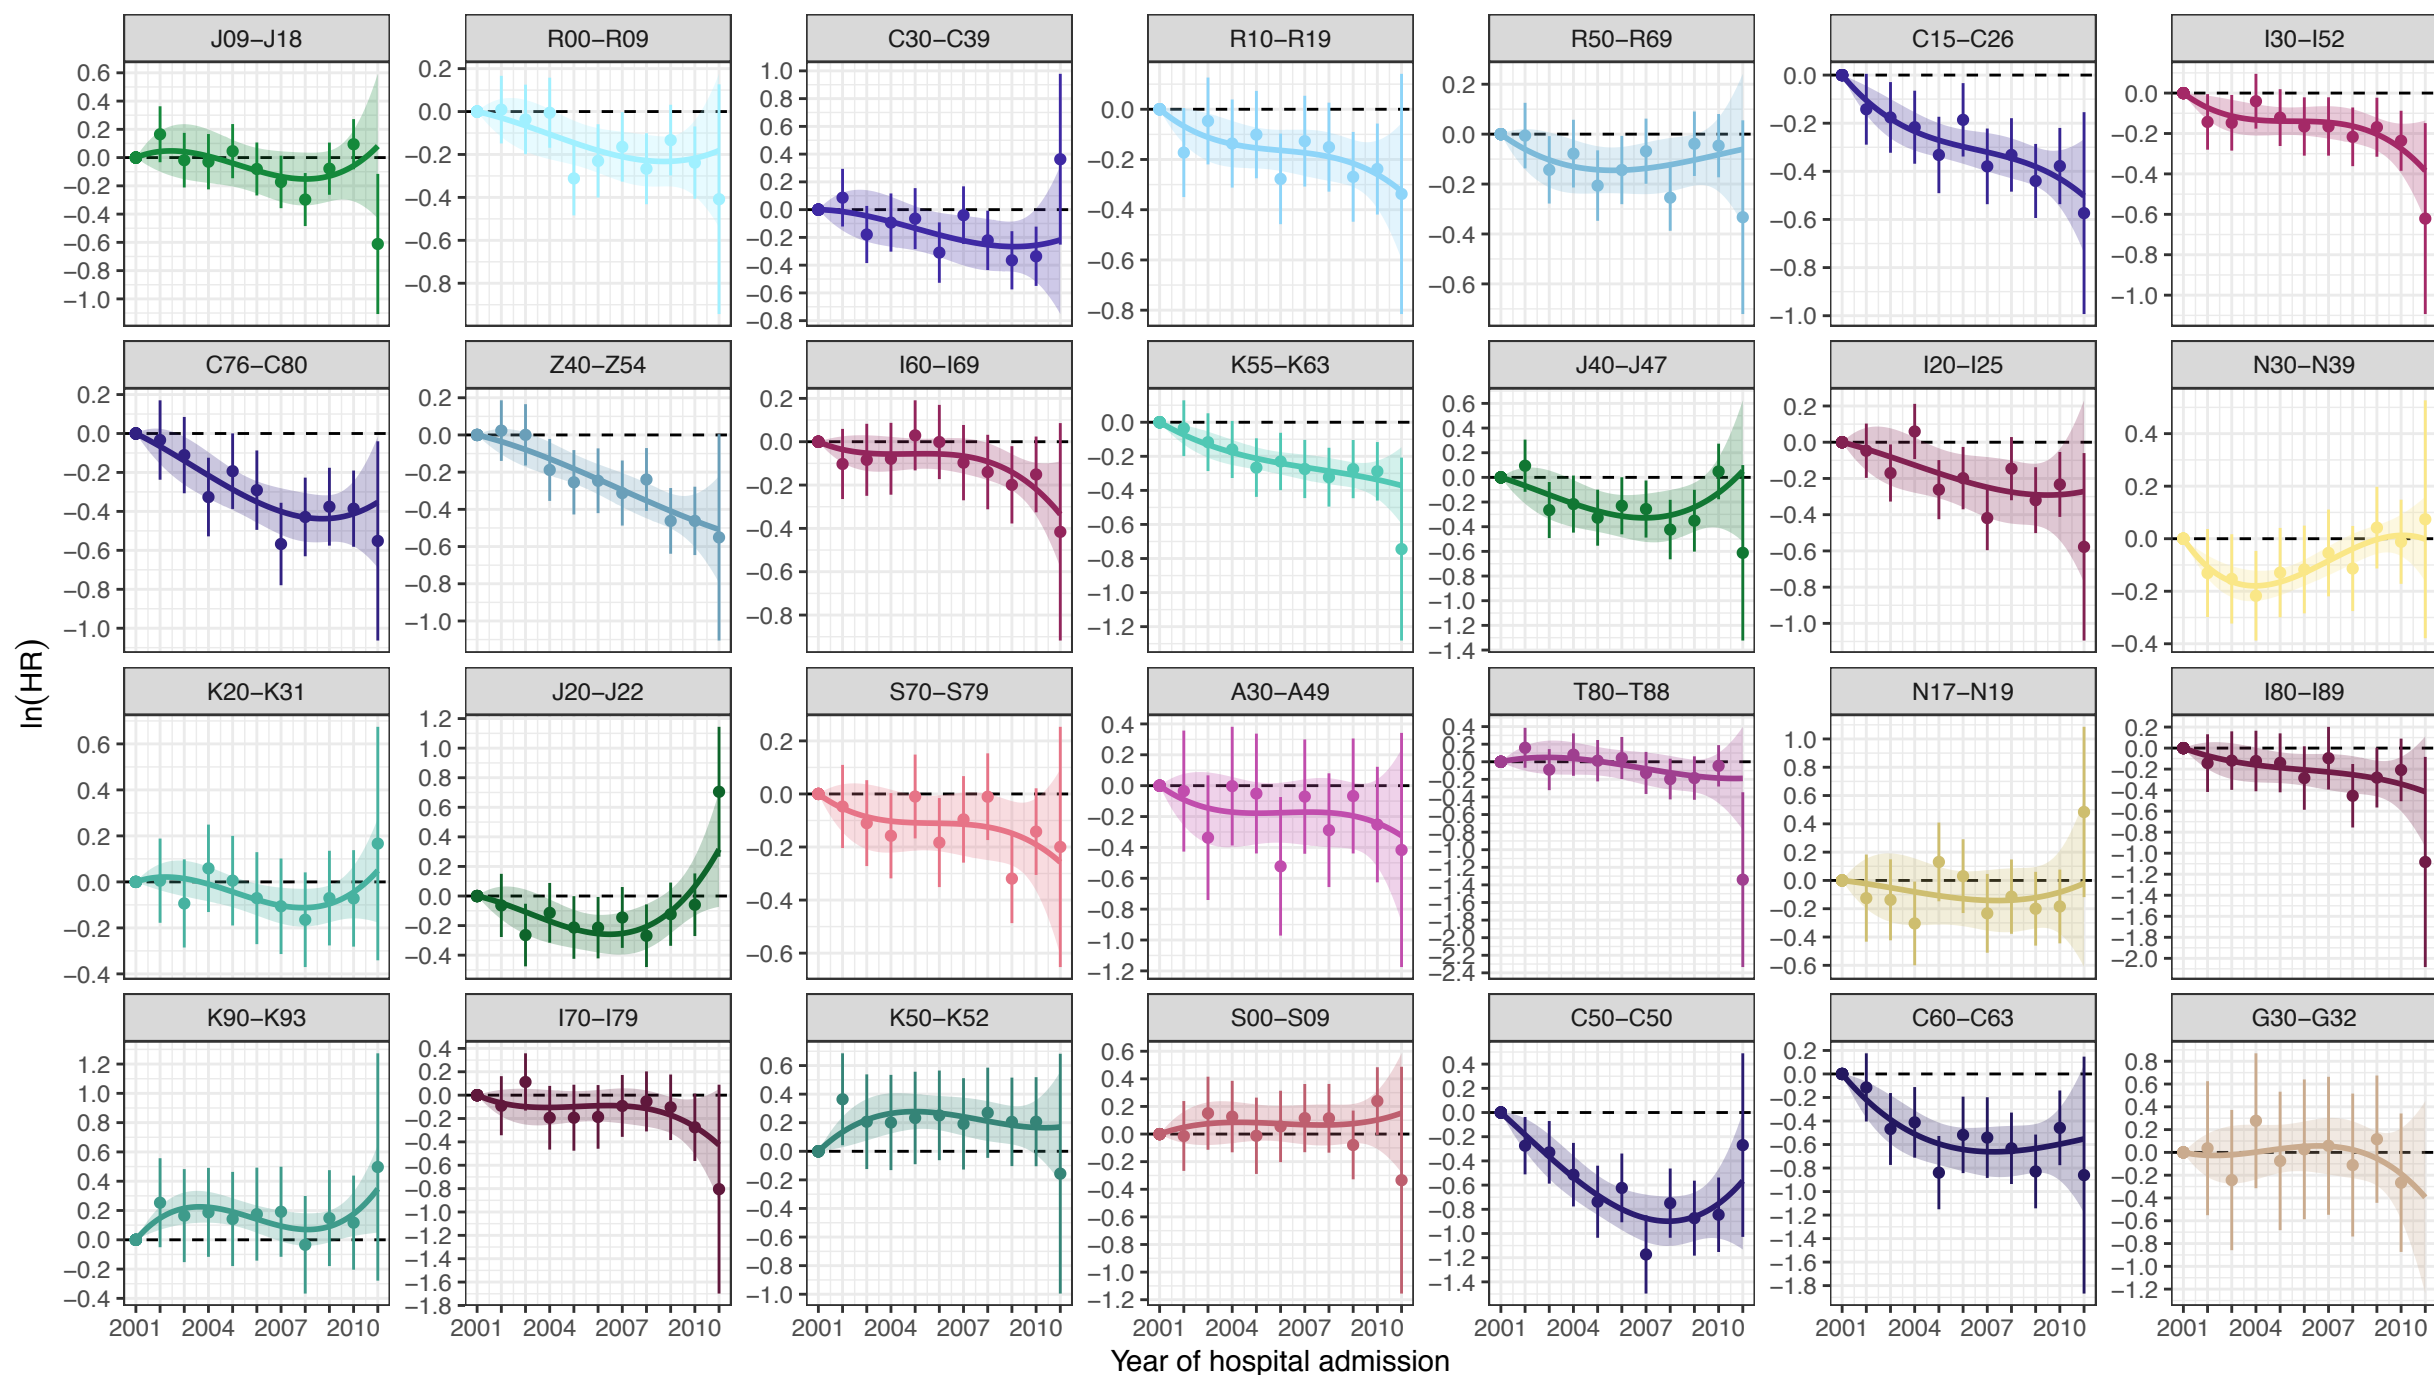

deprivation: 2

Five-year mortality compared to 2001

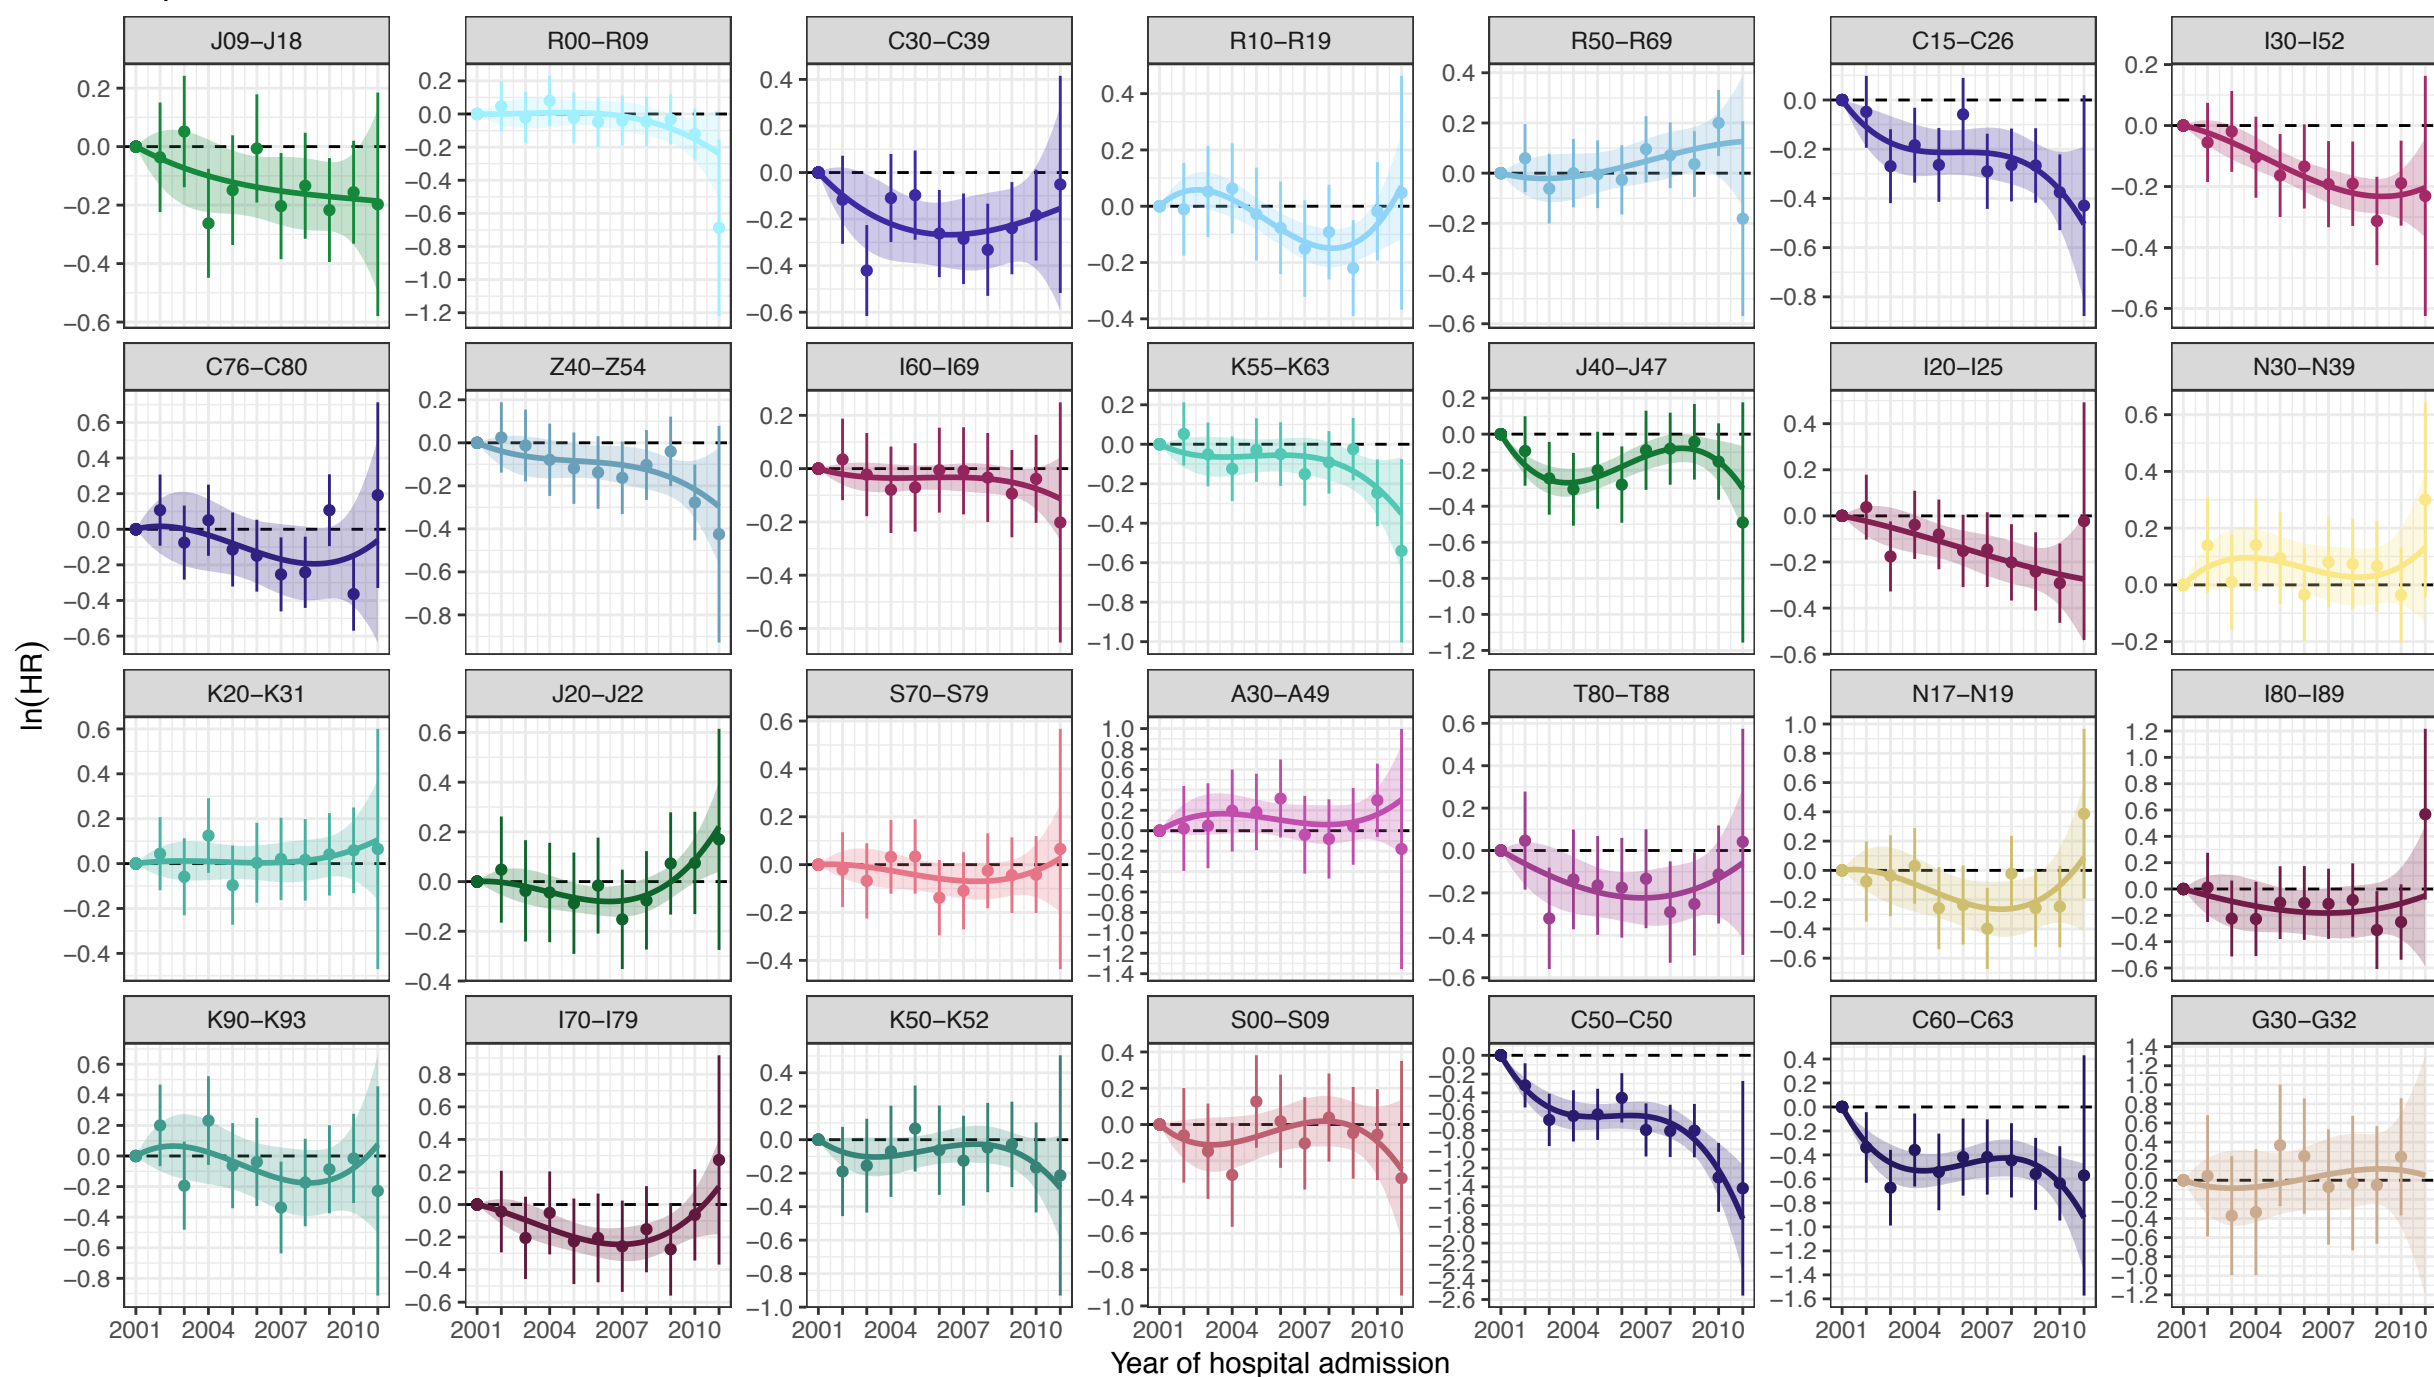

deprivation: 3

Five-year mortality compared to 2001

$\ln(\text{HR})$

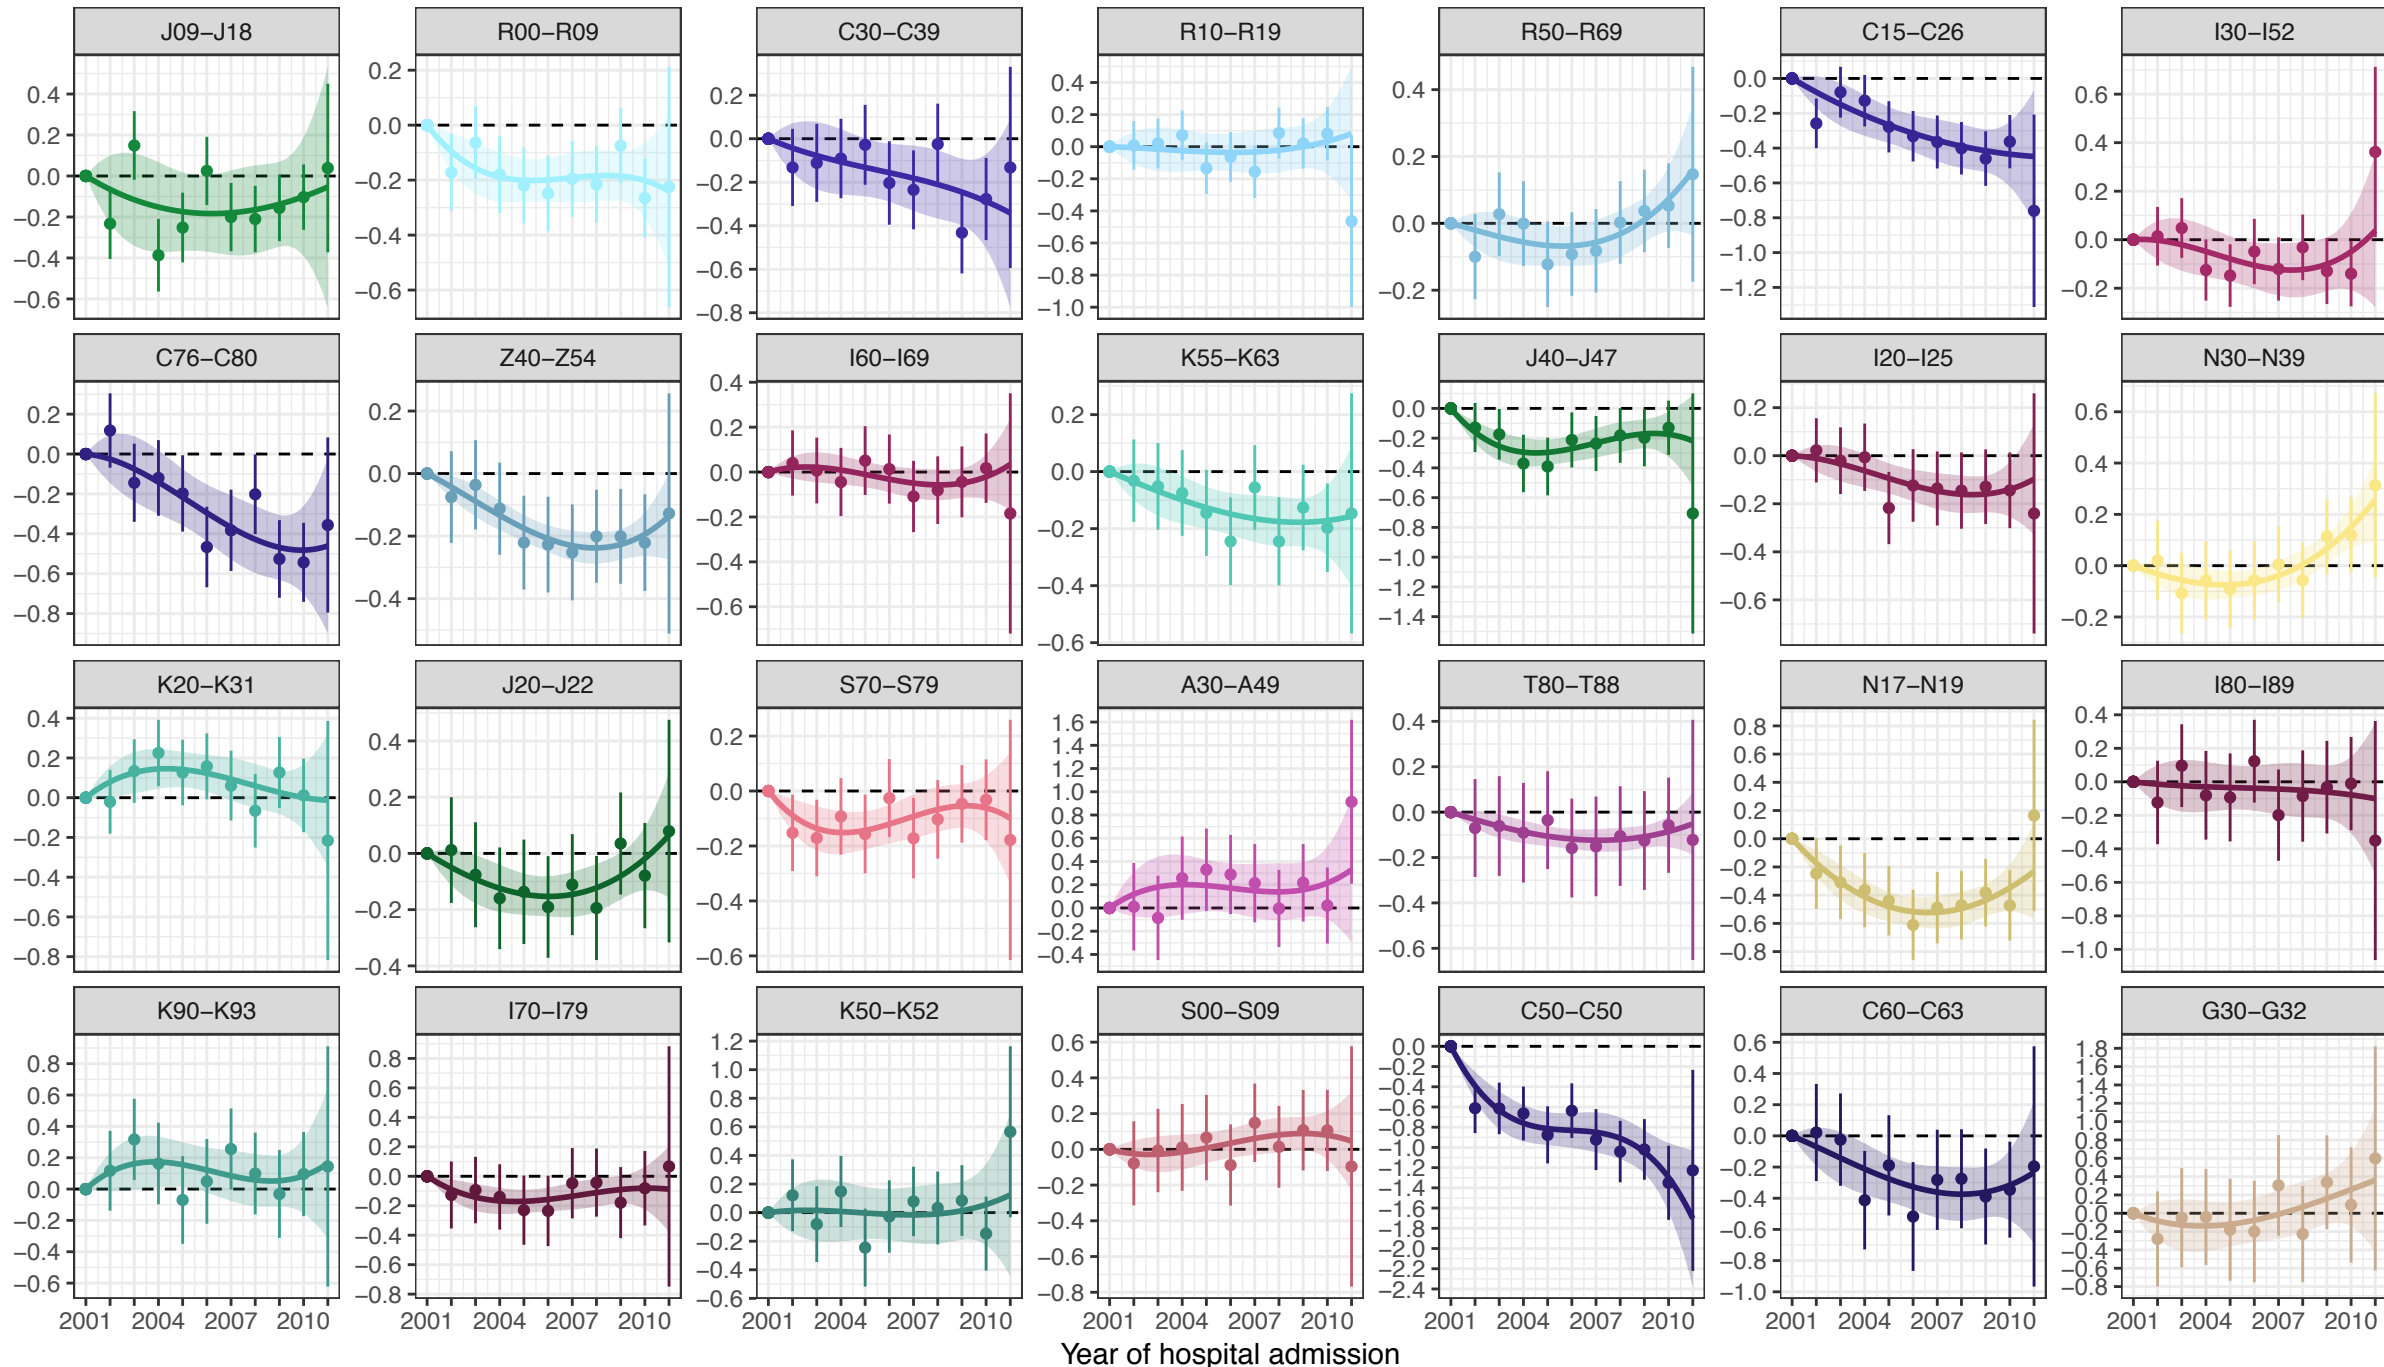



deprivation: 4

Five-year mortality compared to 2001

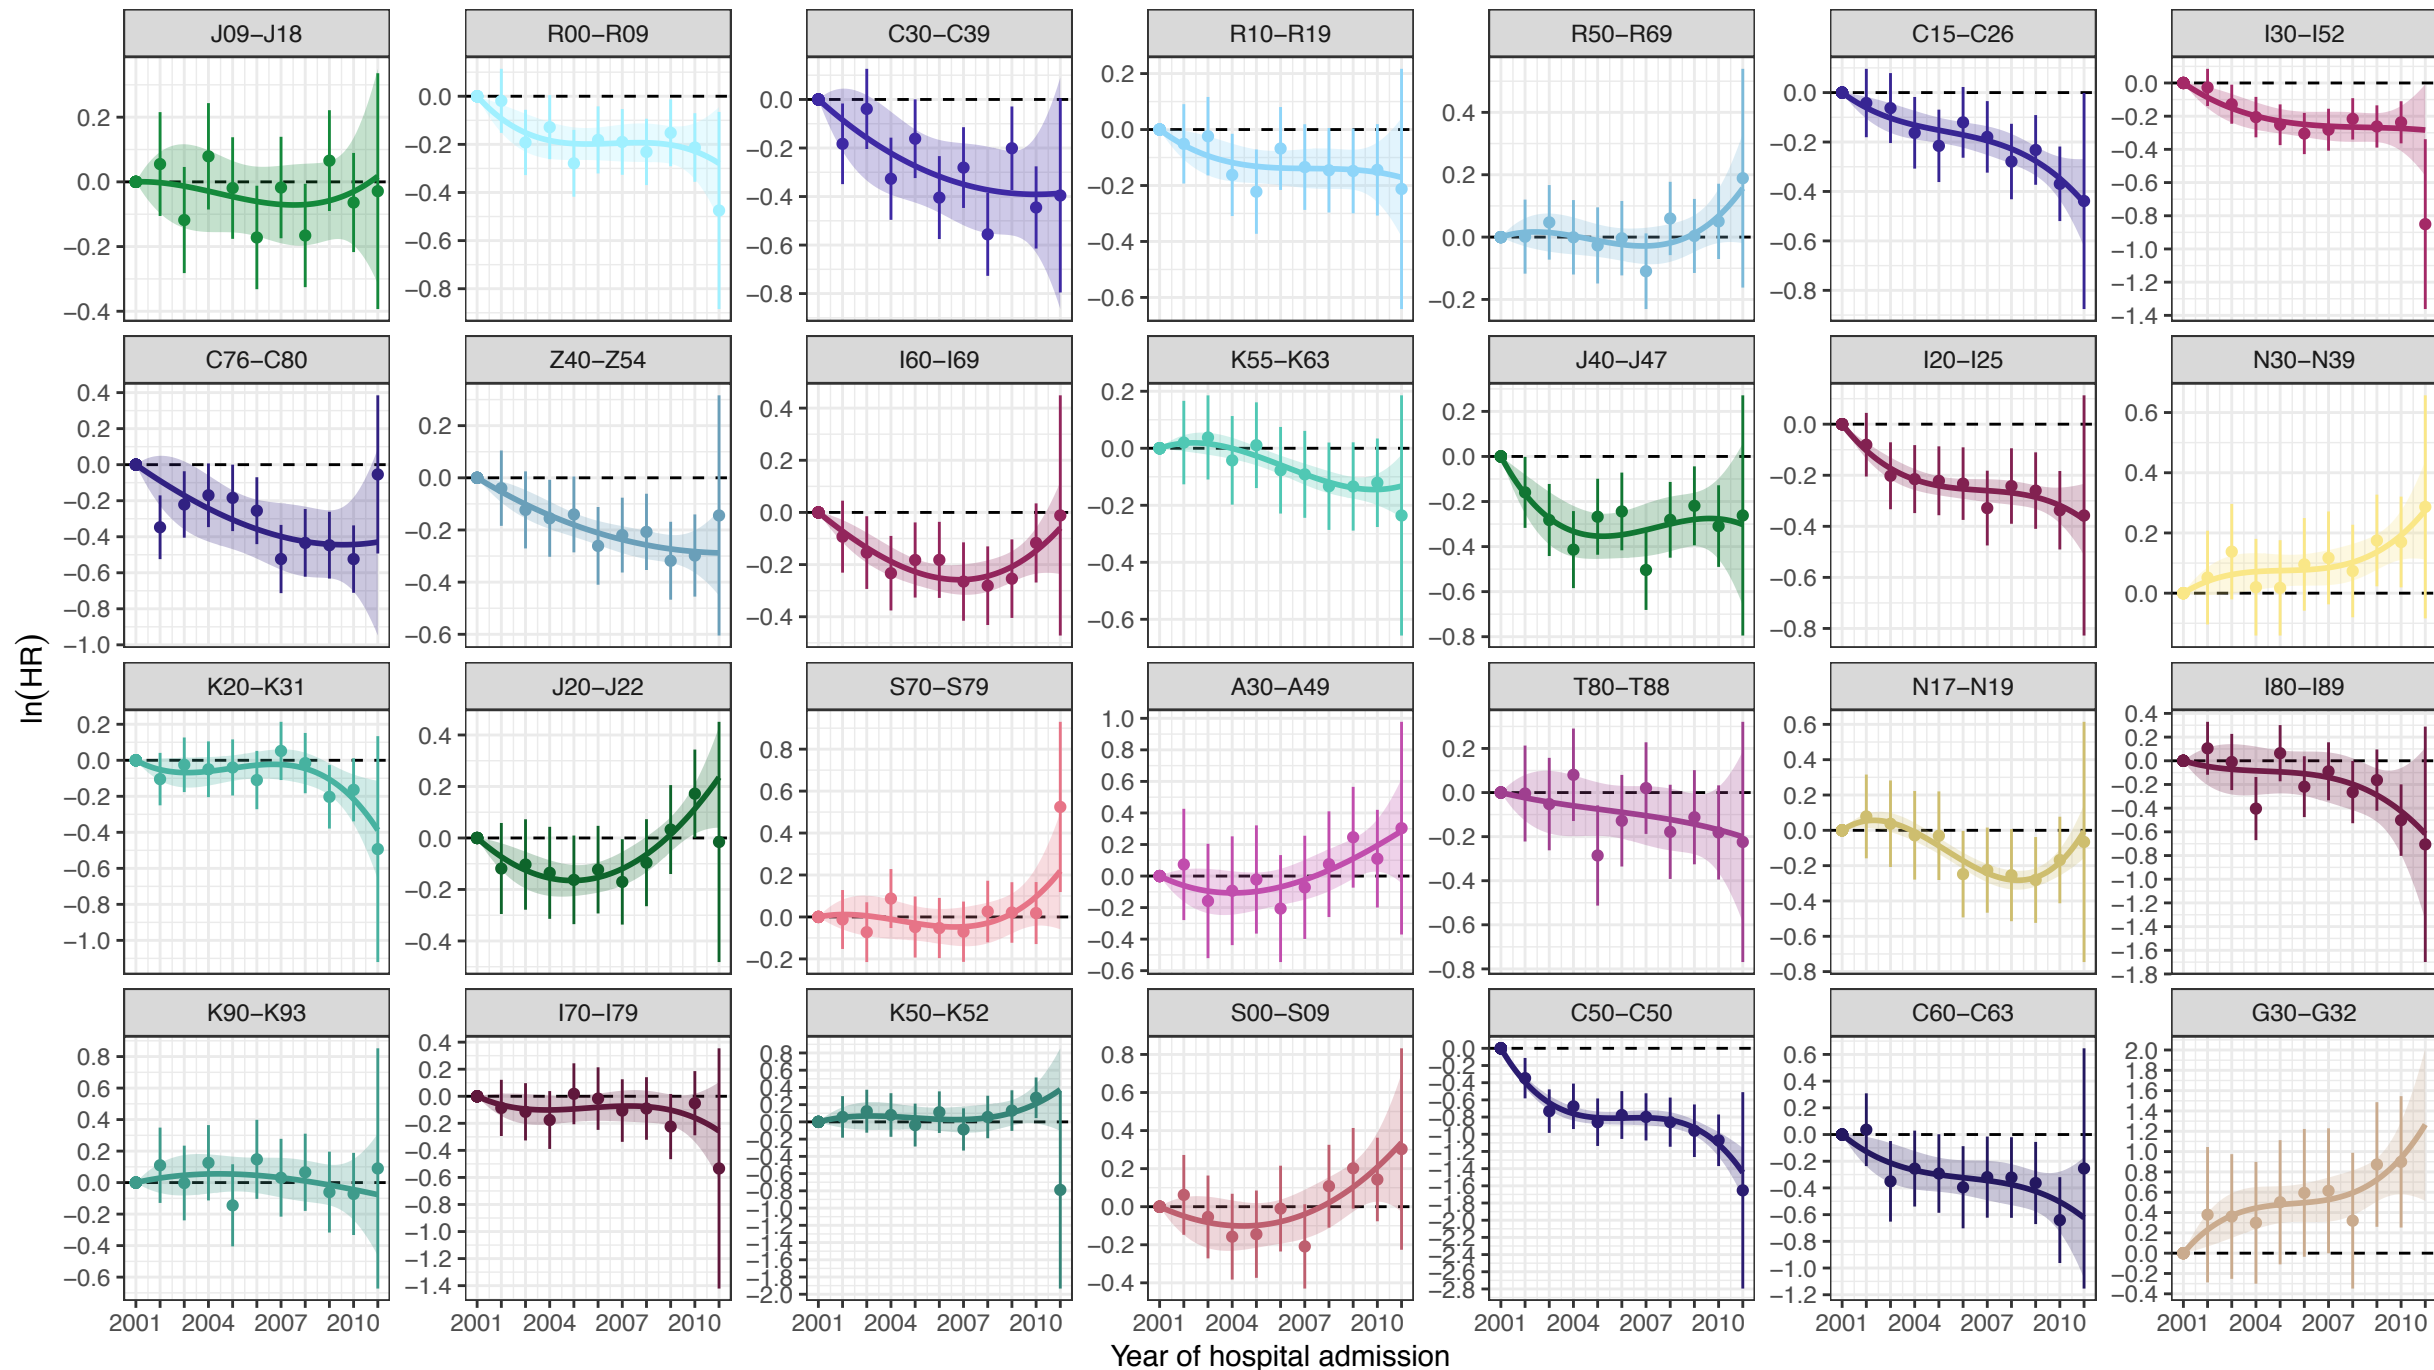



deprivation: 5

Five-year mortality compared to 2001

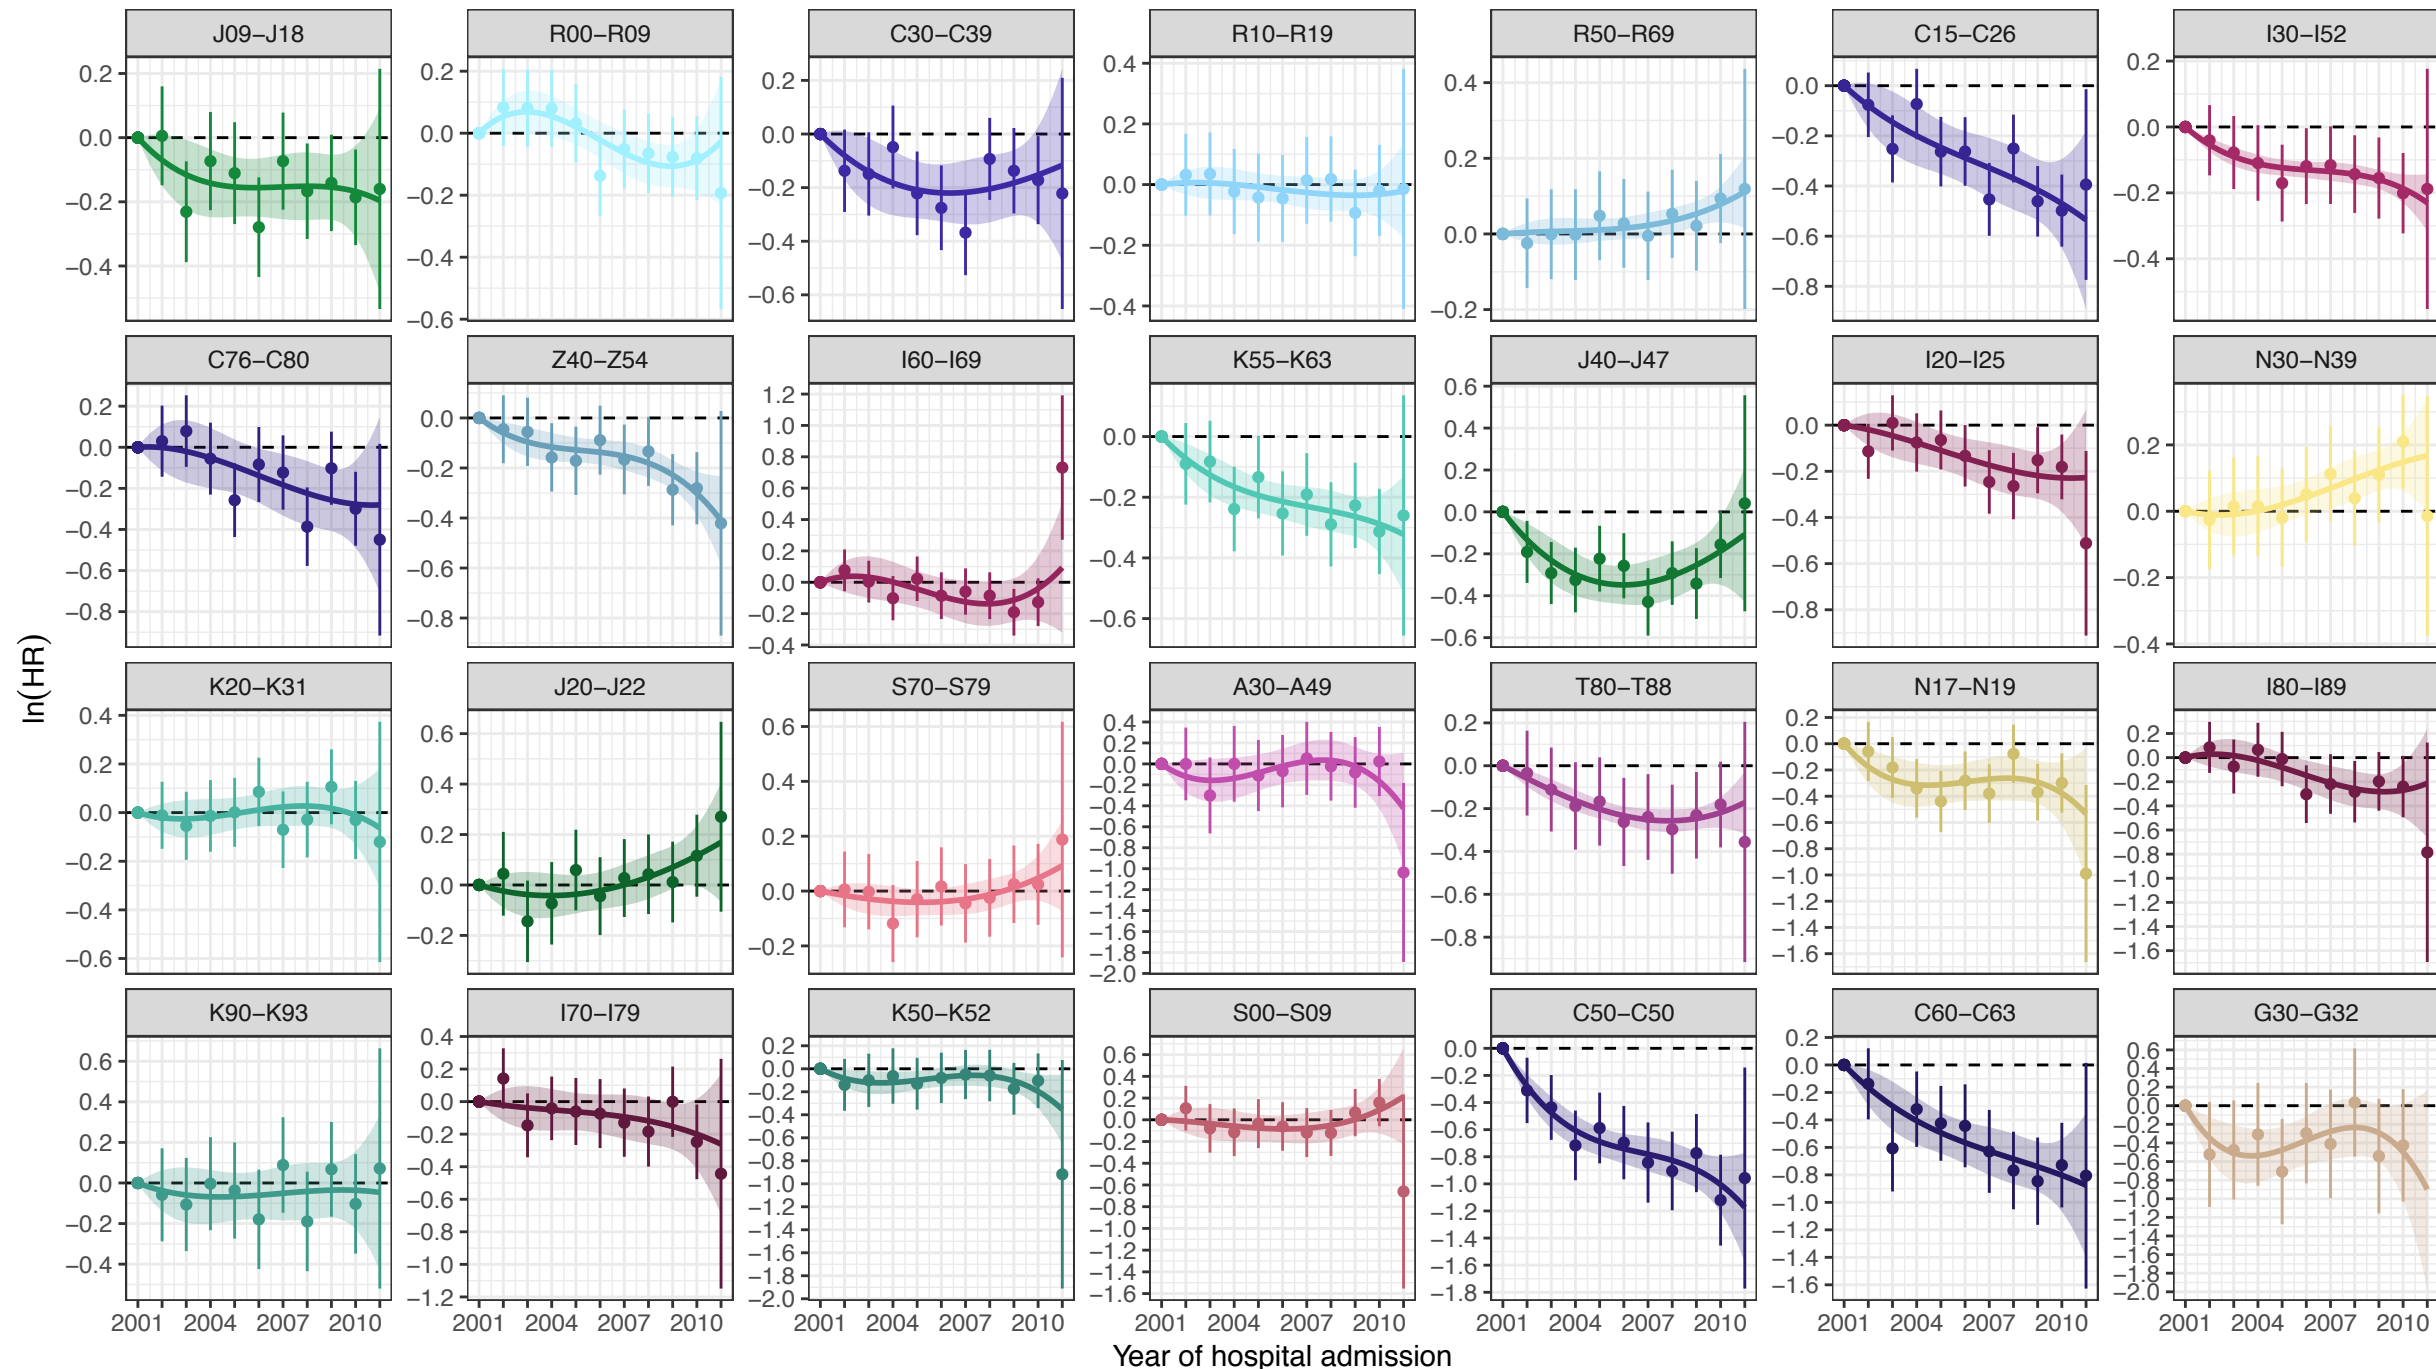

deprivation: 6

Five-year mortality compared to 2001

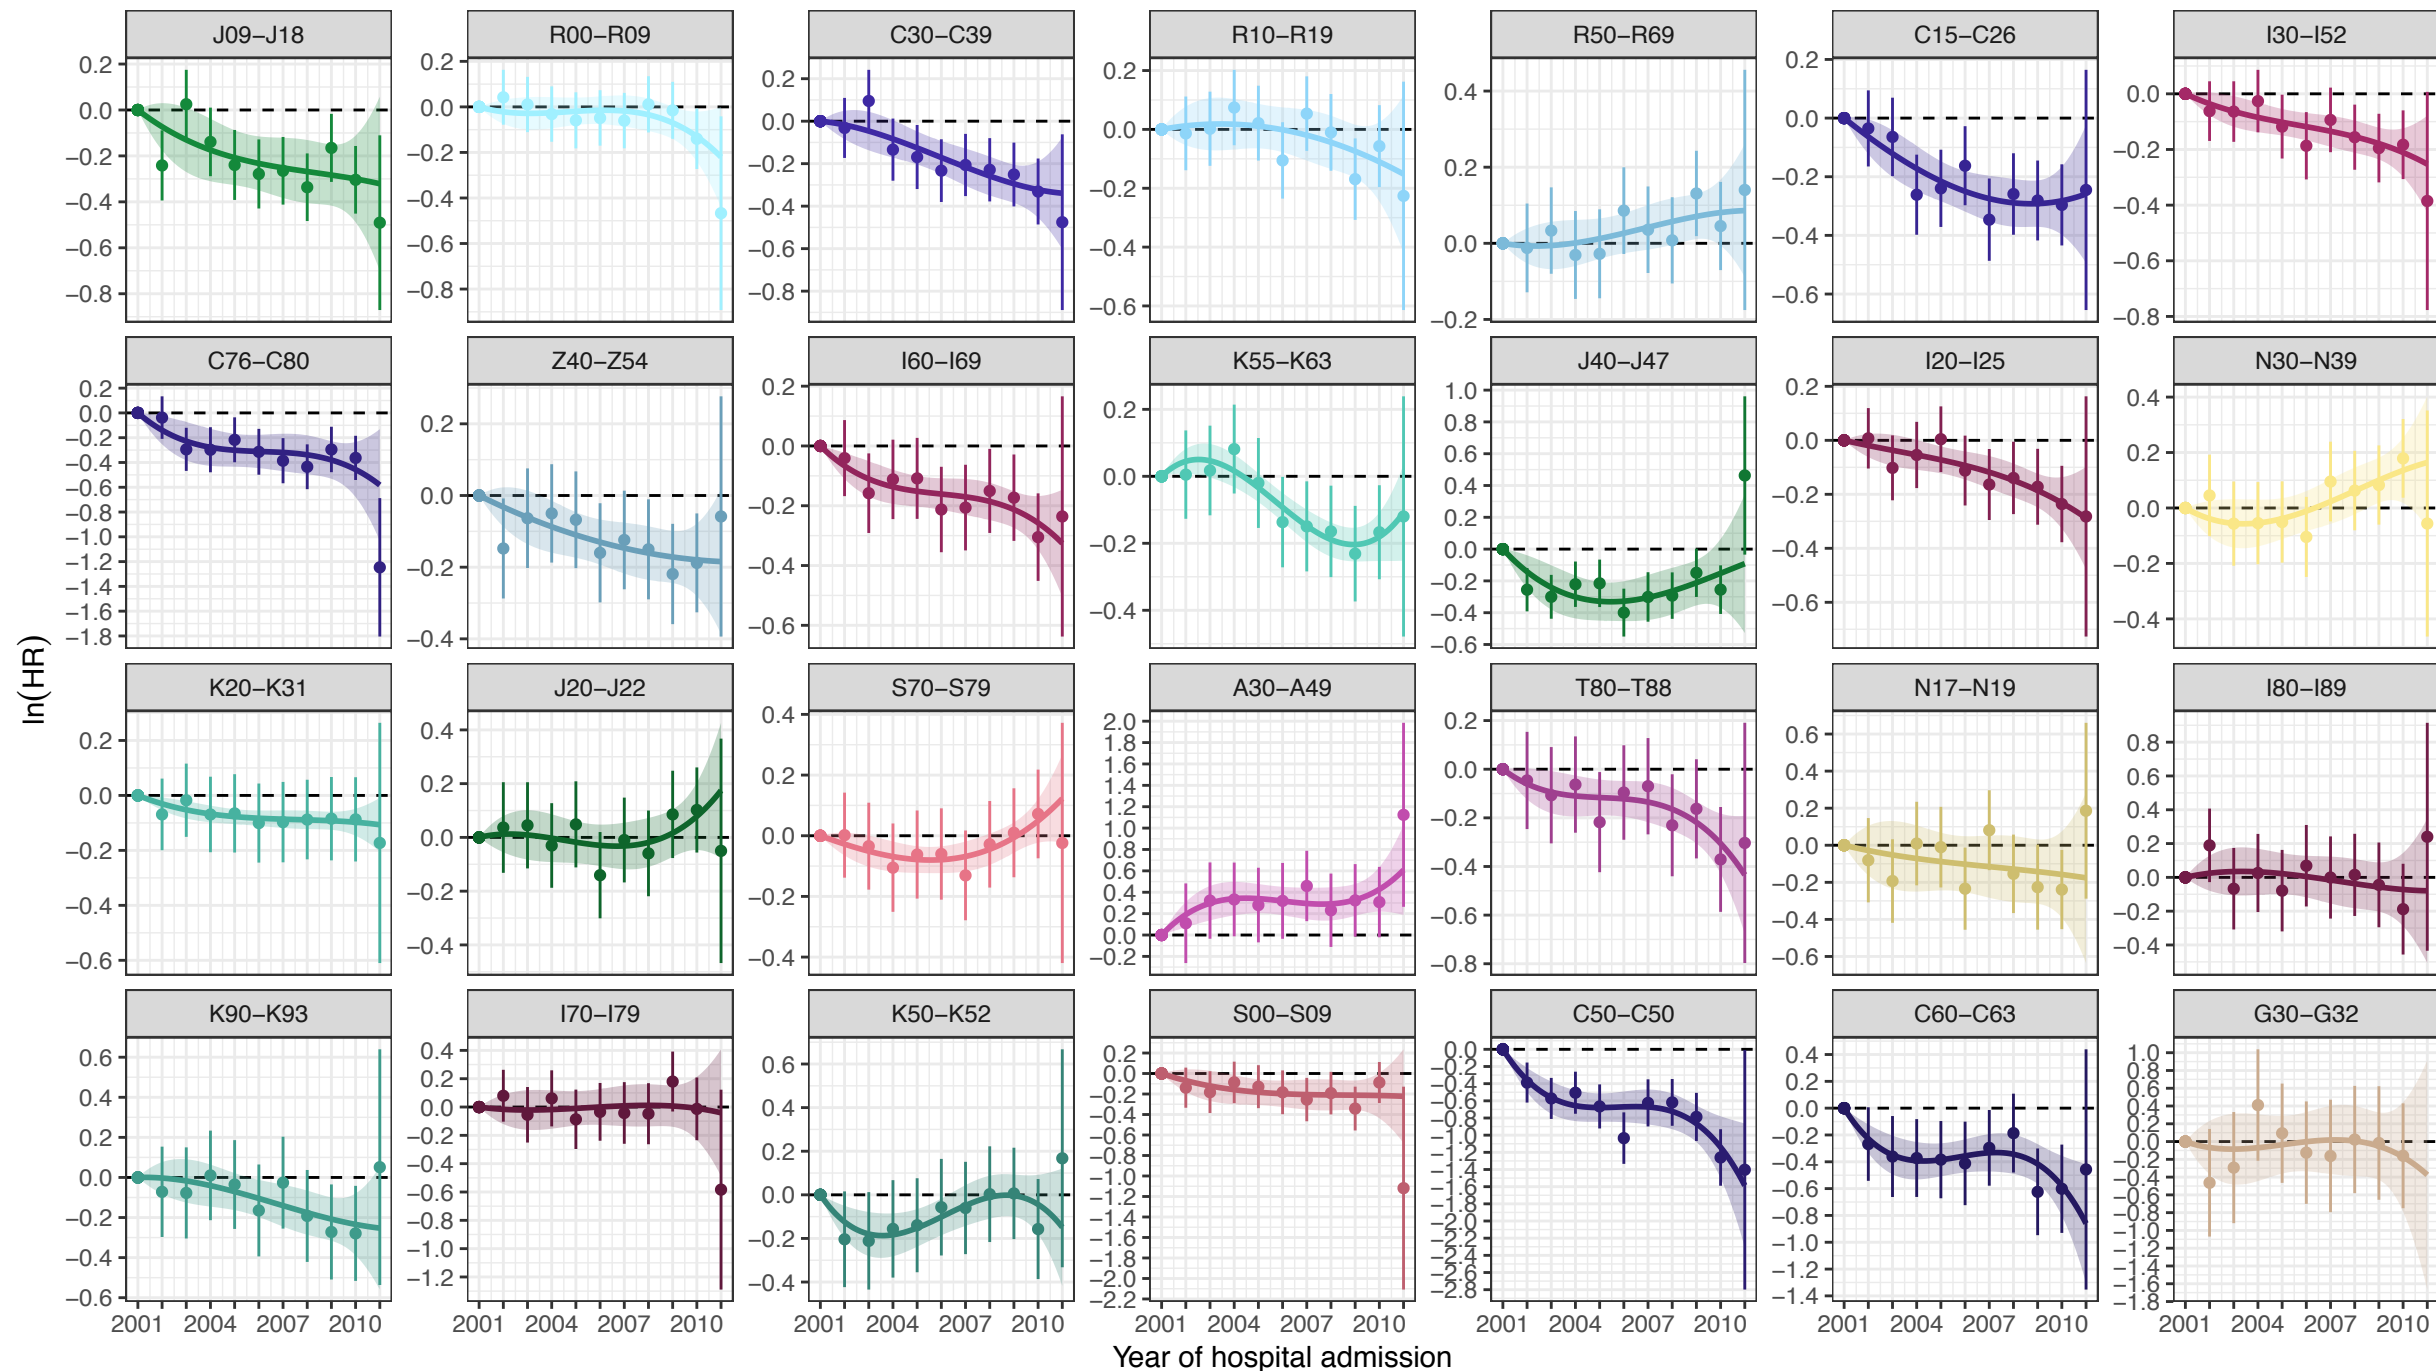

deprivation: 7

Five-year mortality compared to 2001

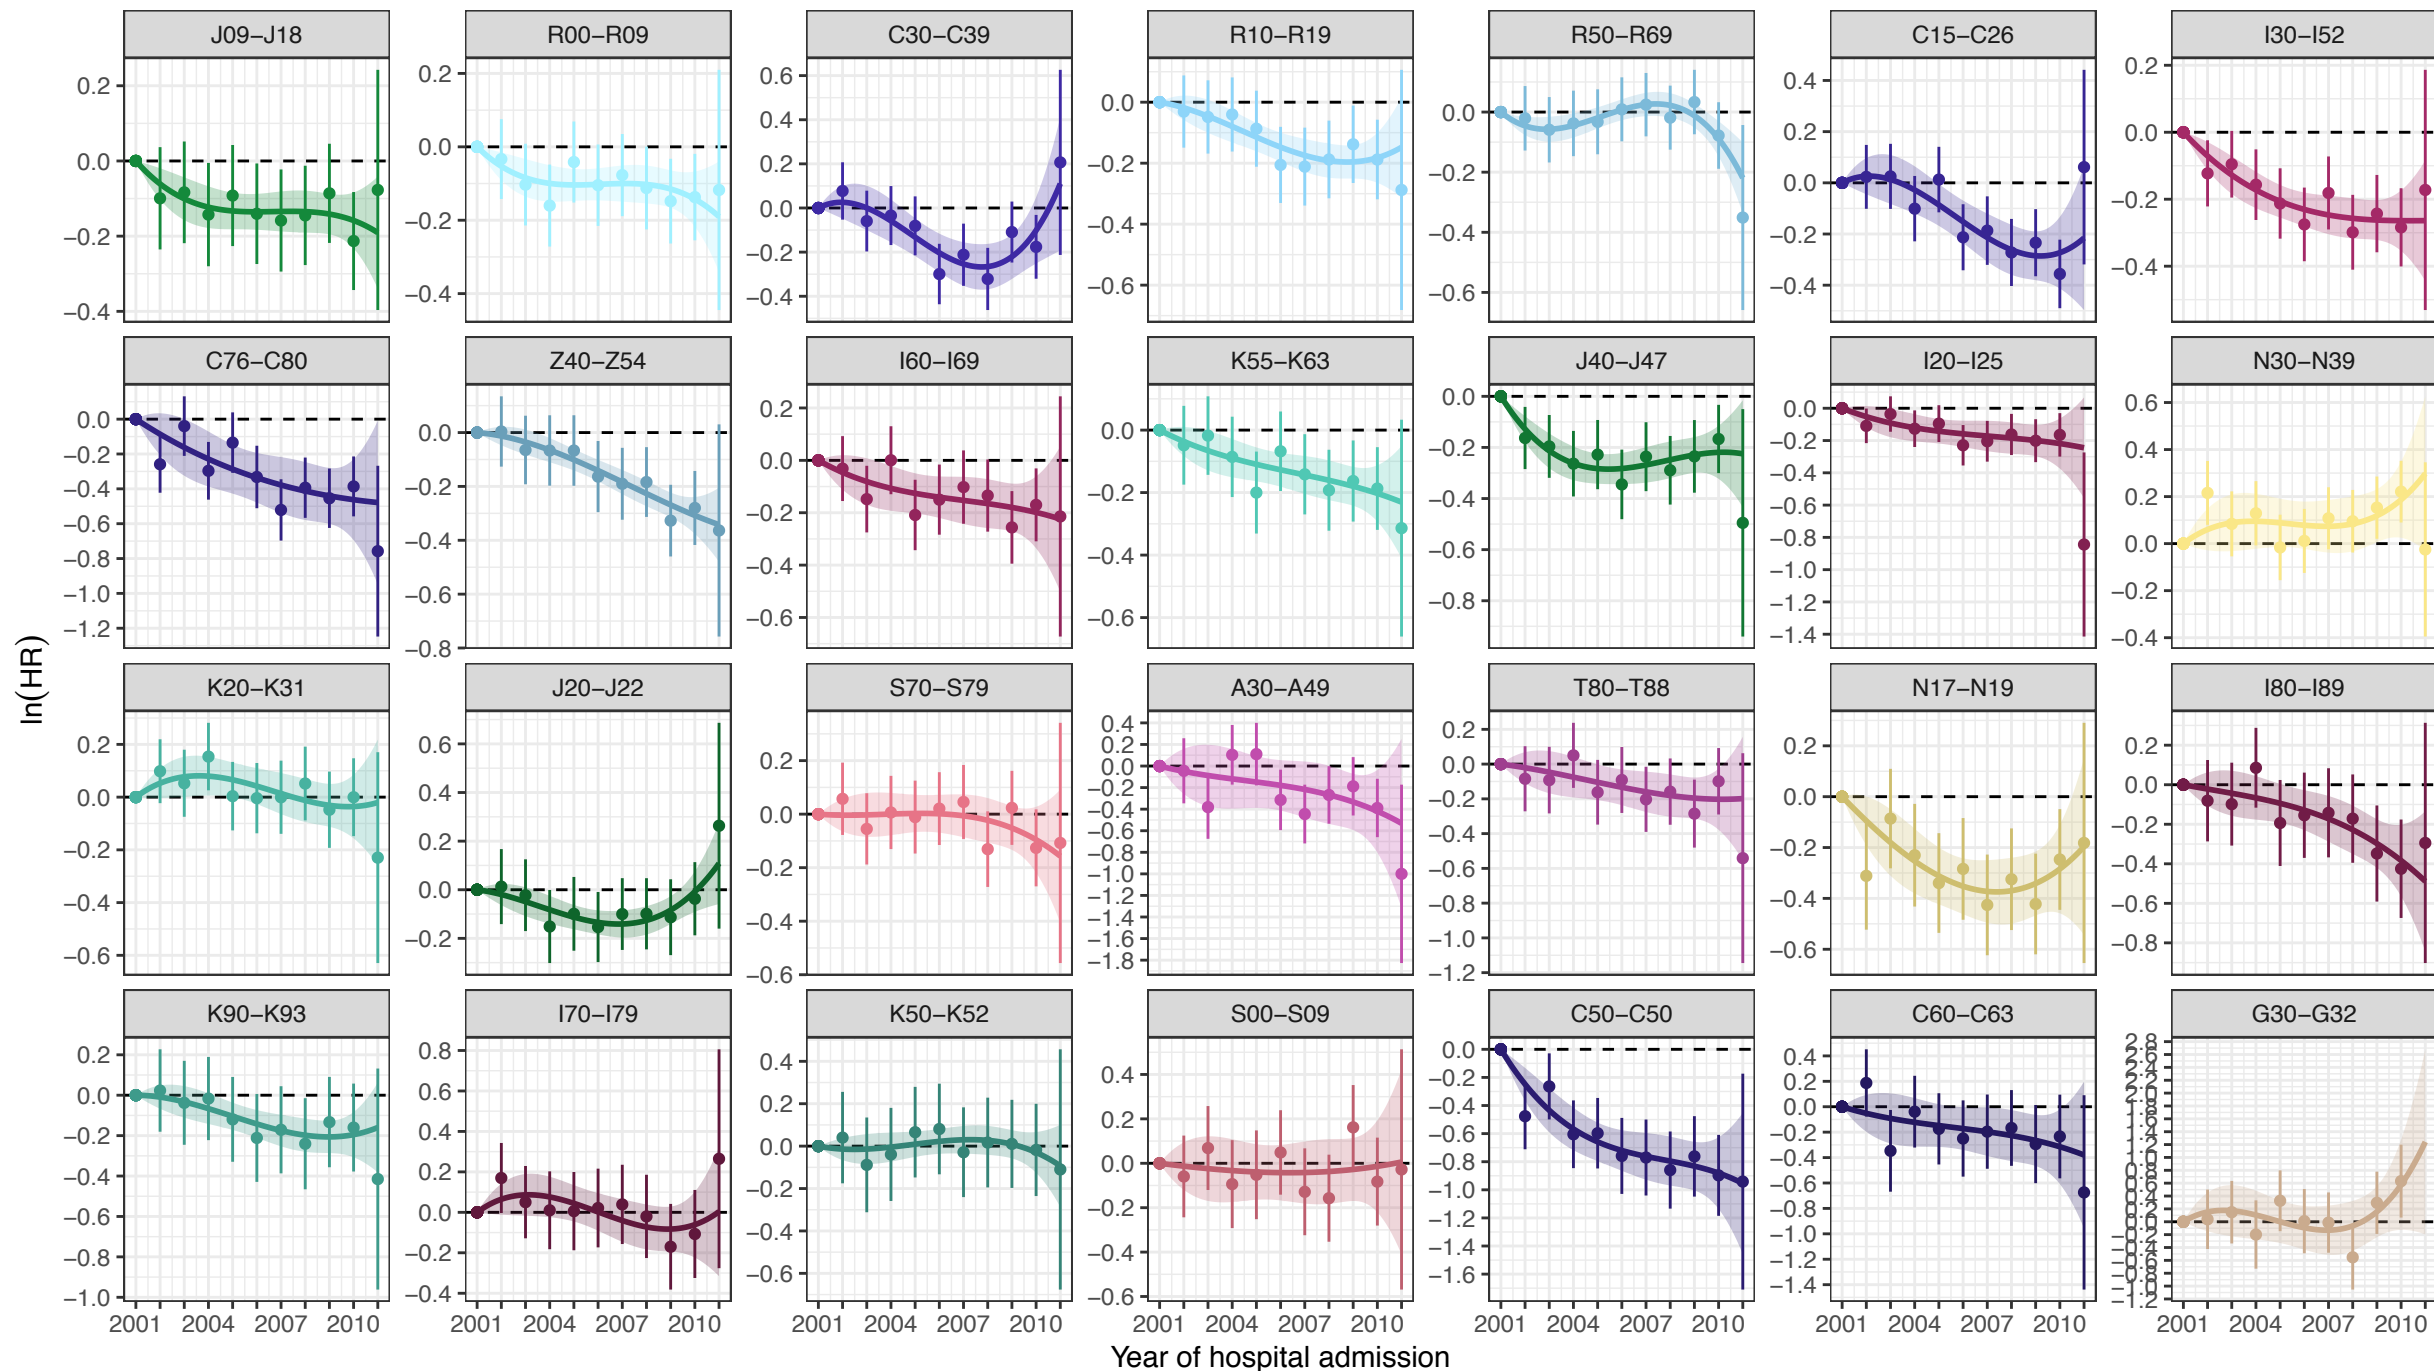

deprivation: 8

Five-year mortality compared to 2001

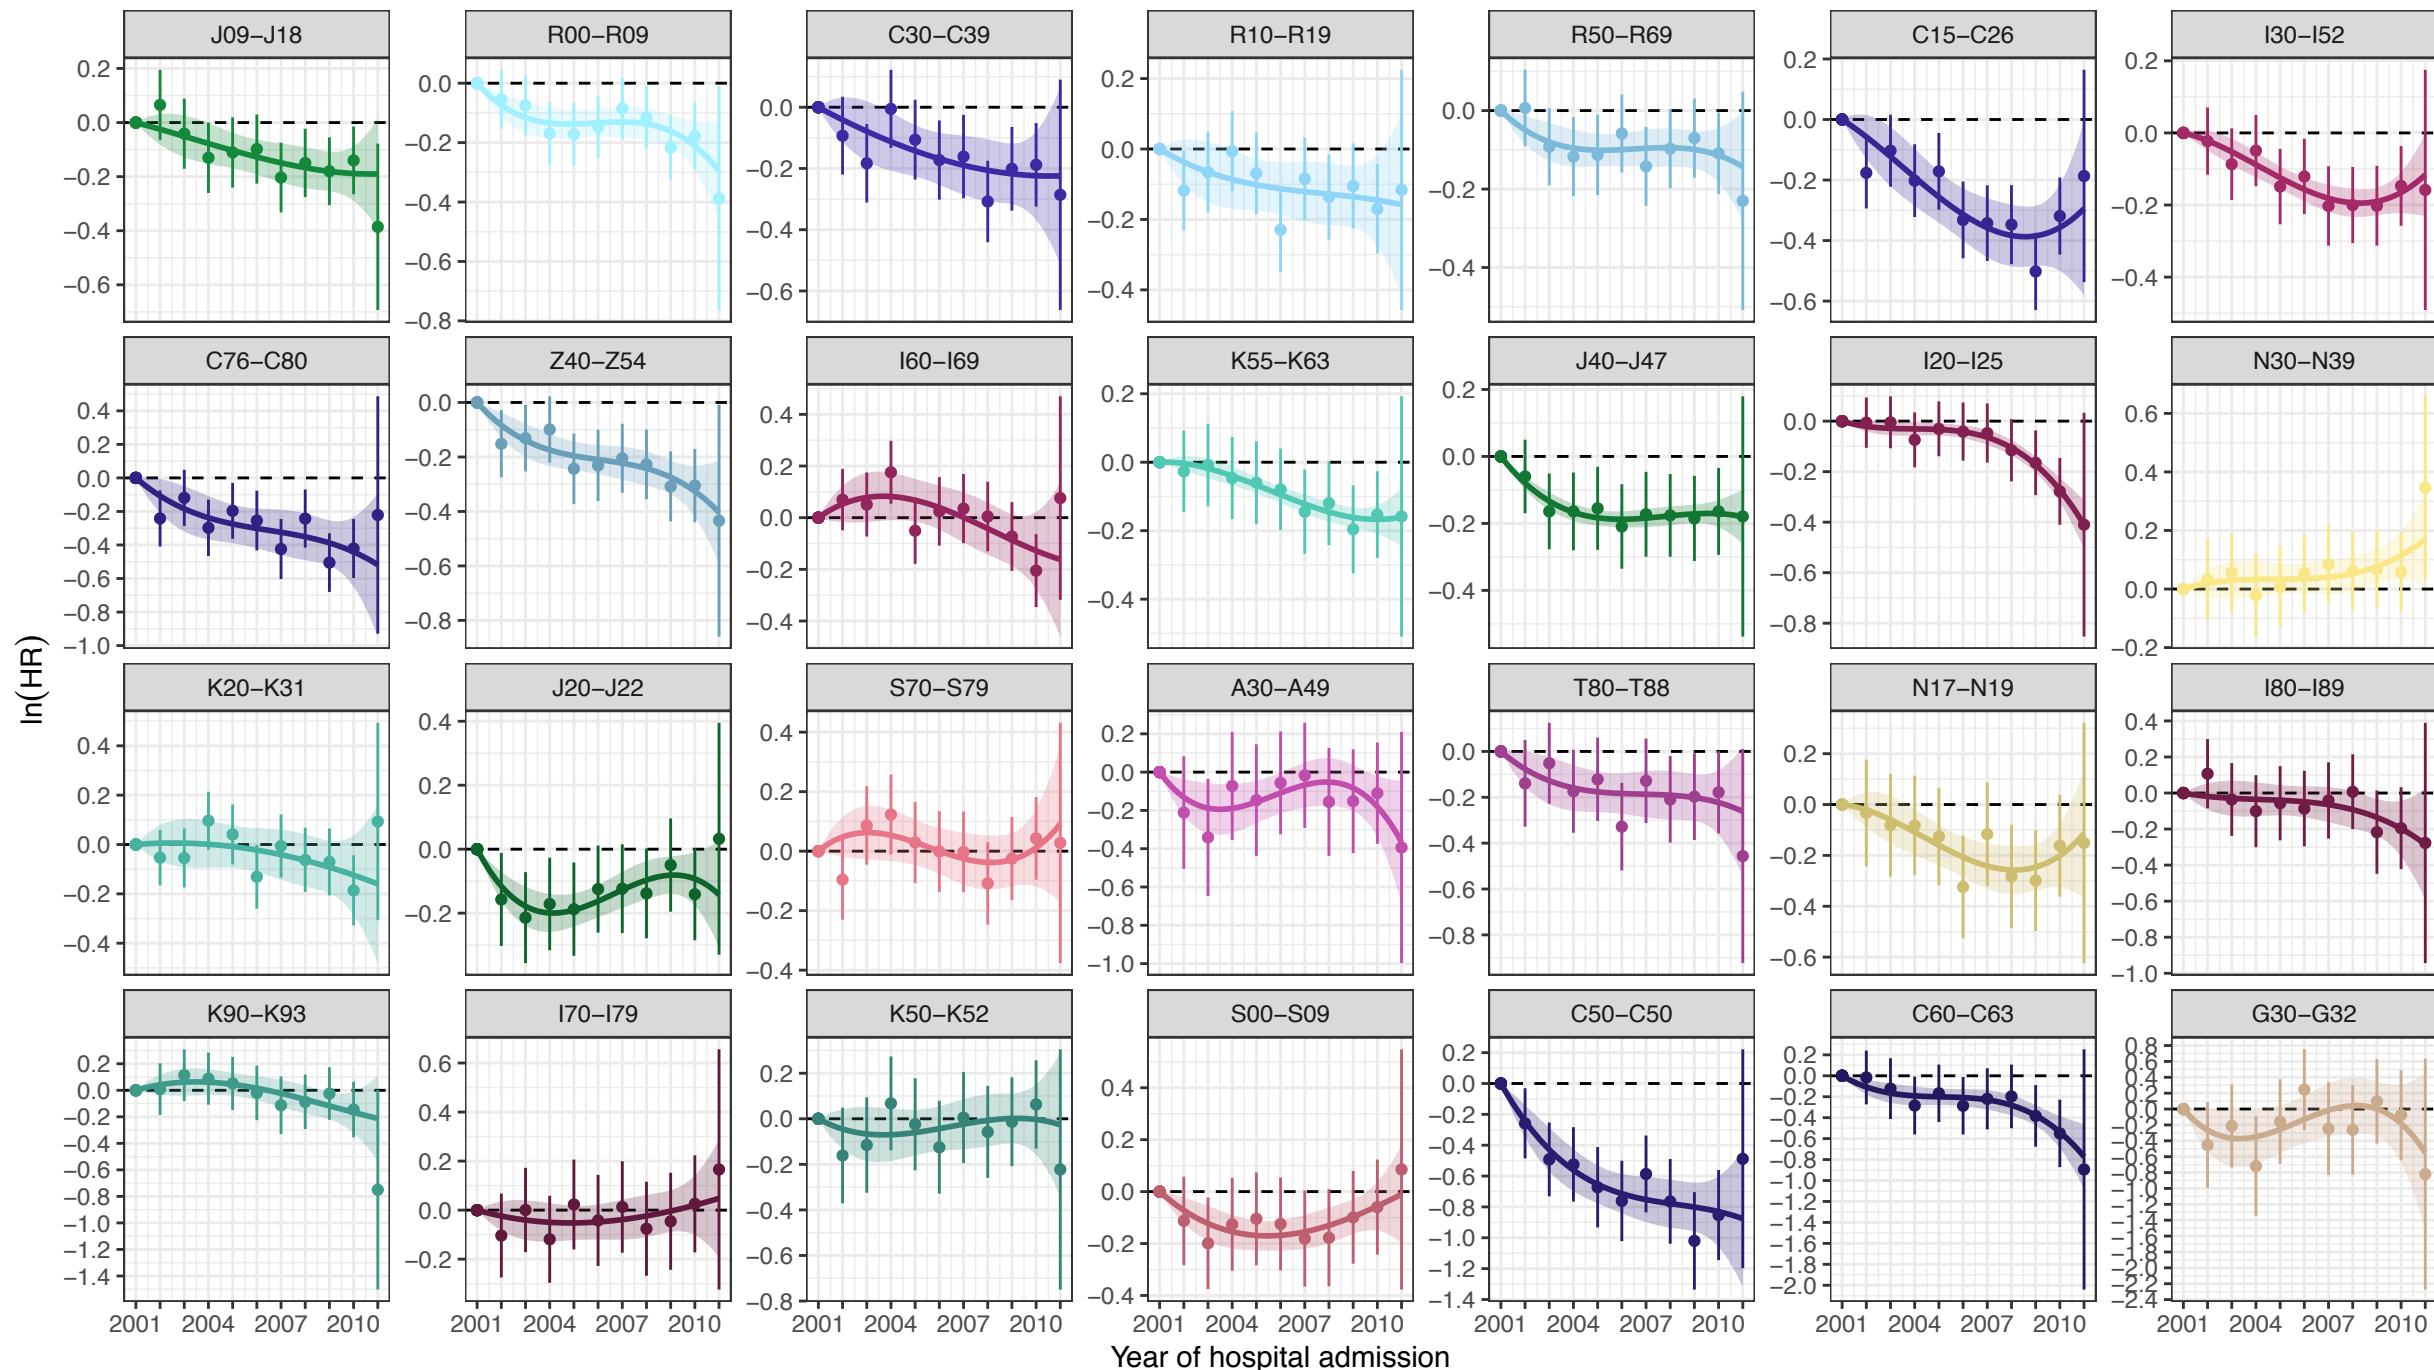

deprivation: 9

Five-year mortality compared to 2001

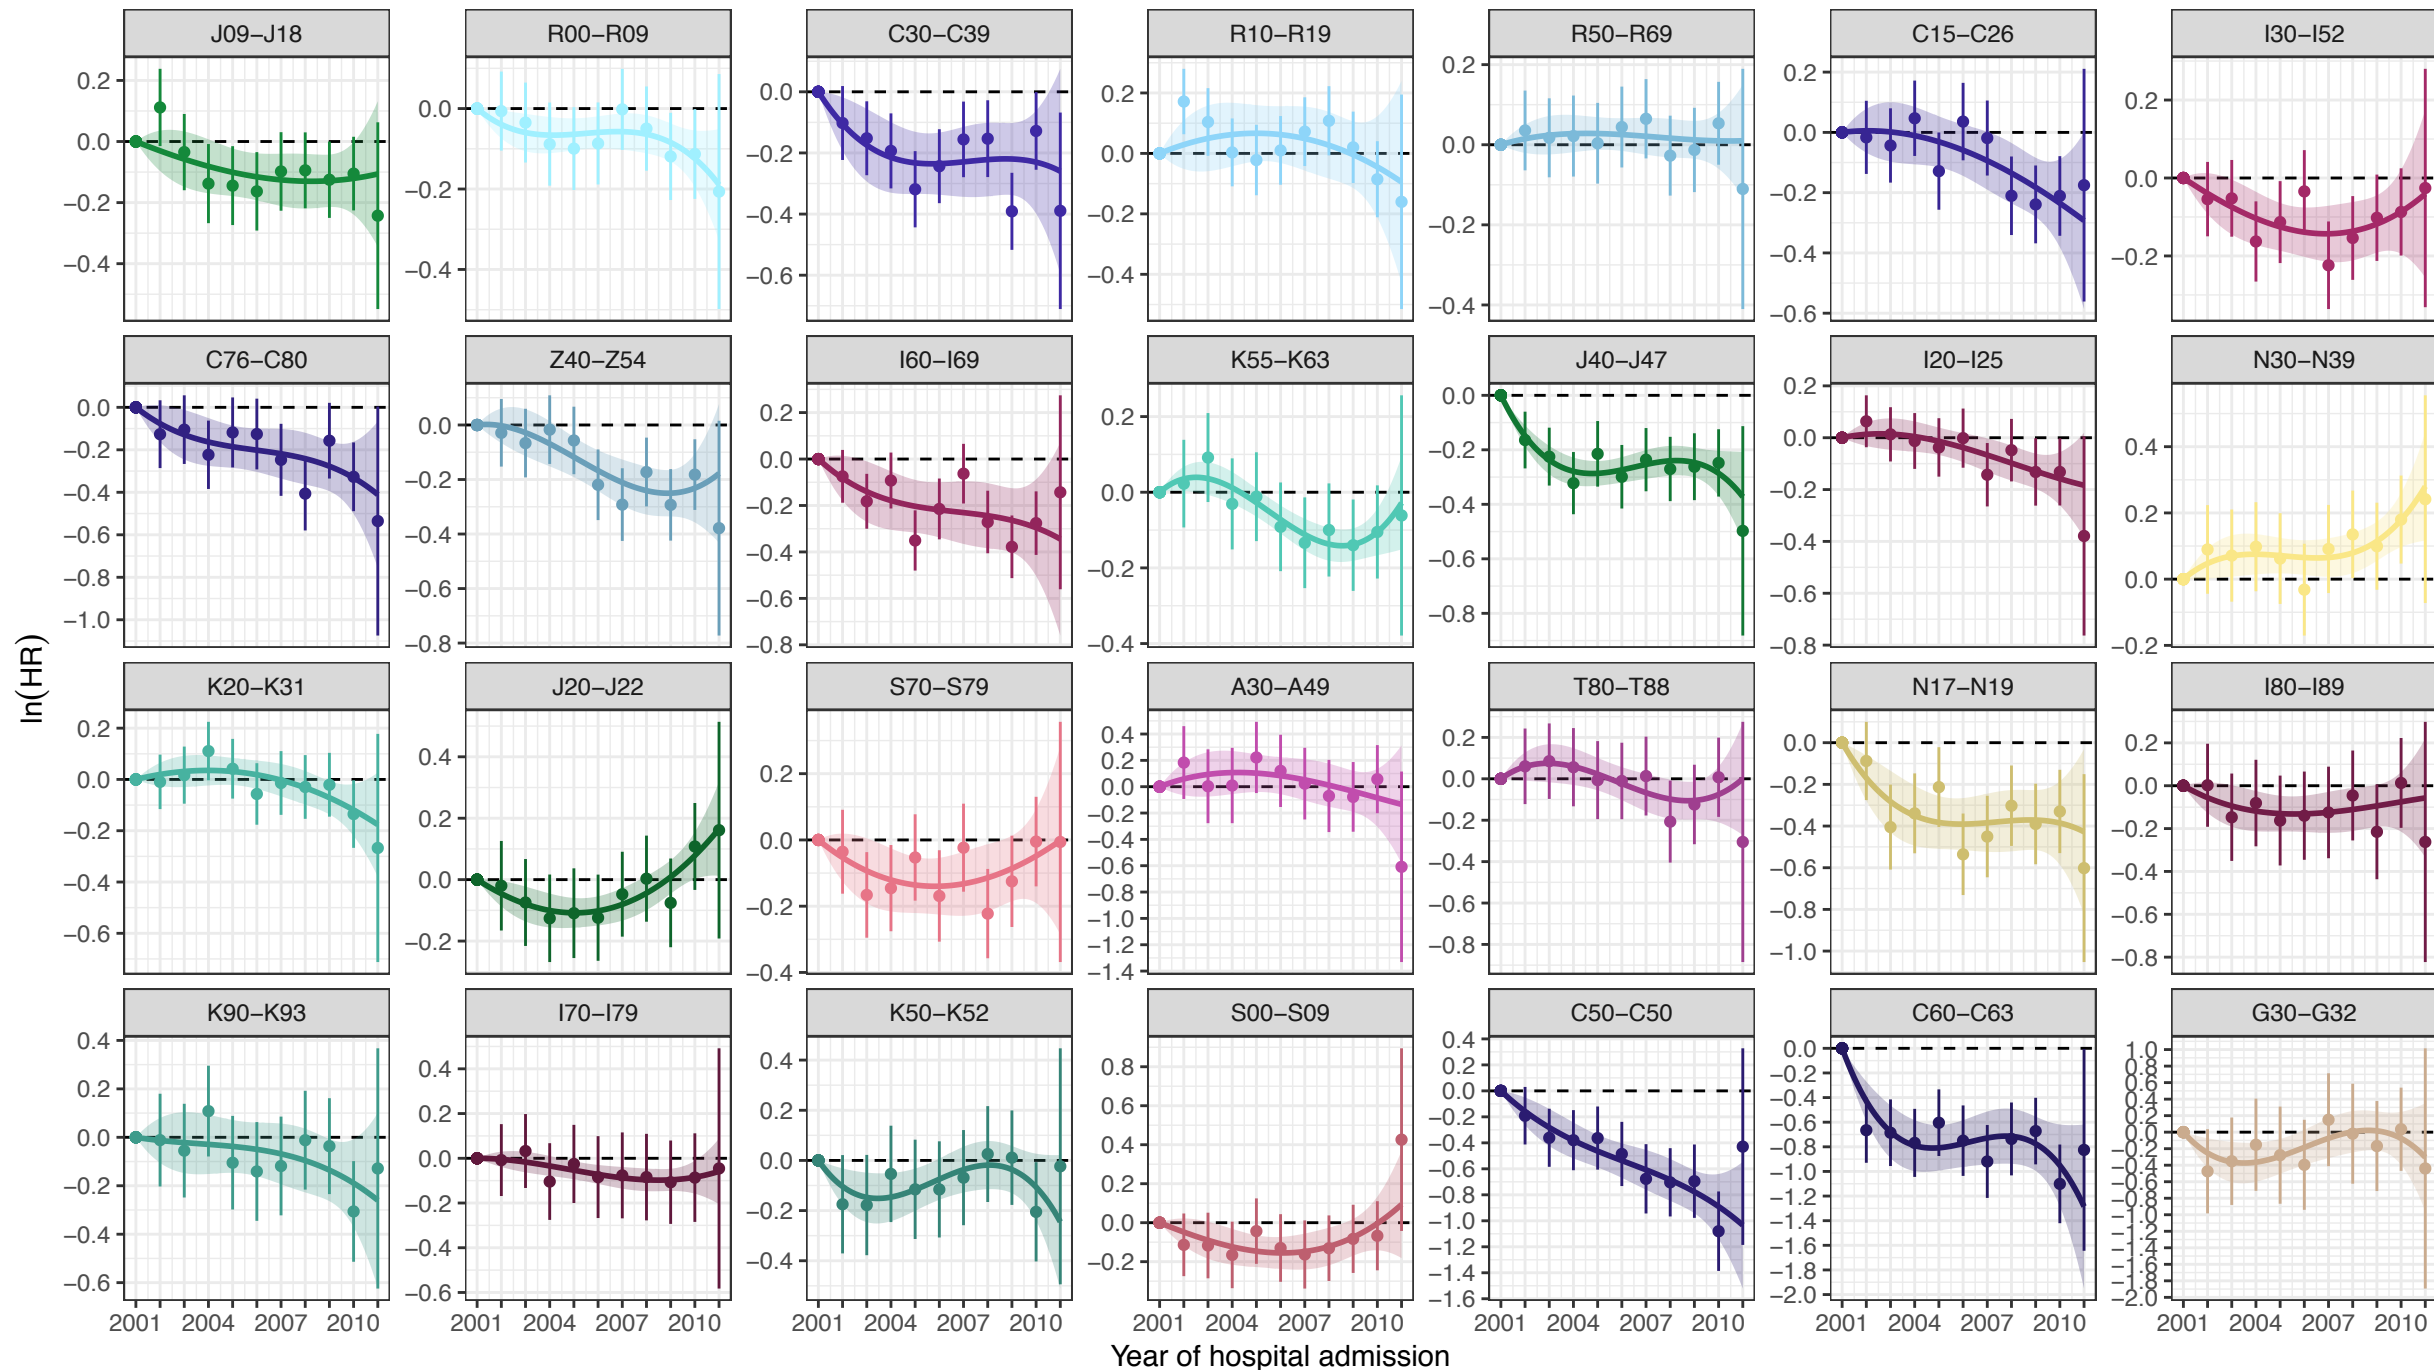

deprivation: 10

Five-year mortality compared to 2001

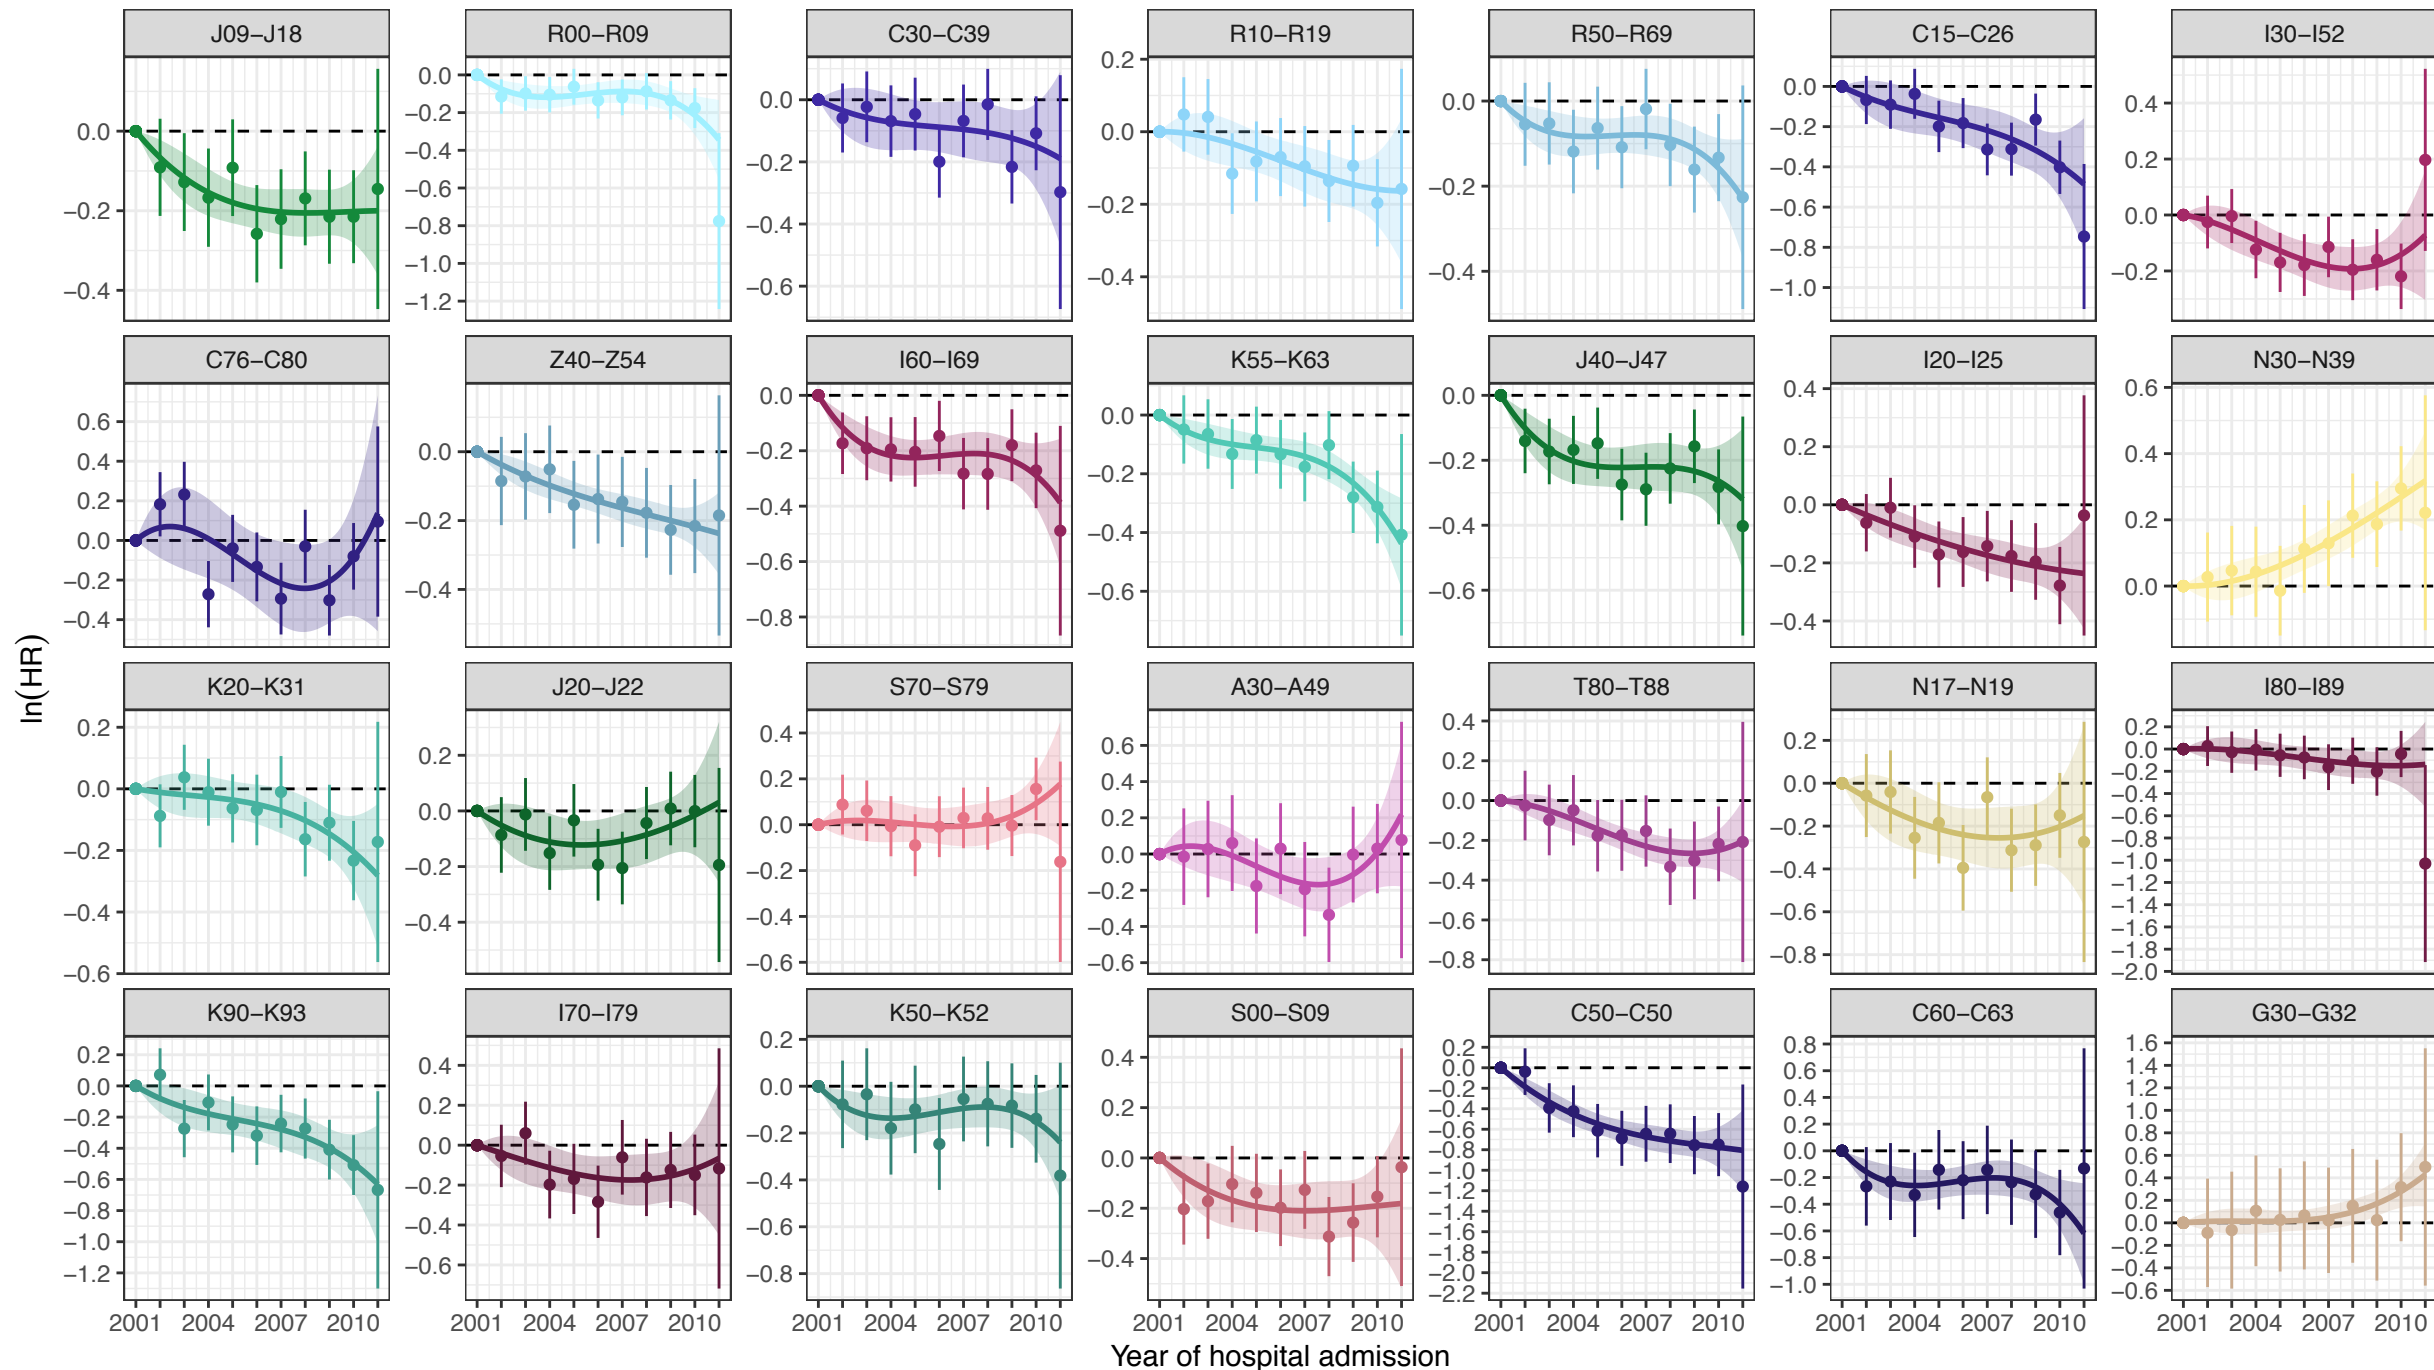

Year of hospital admission



deprivation: 1

Five-year mortality compared to 2001

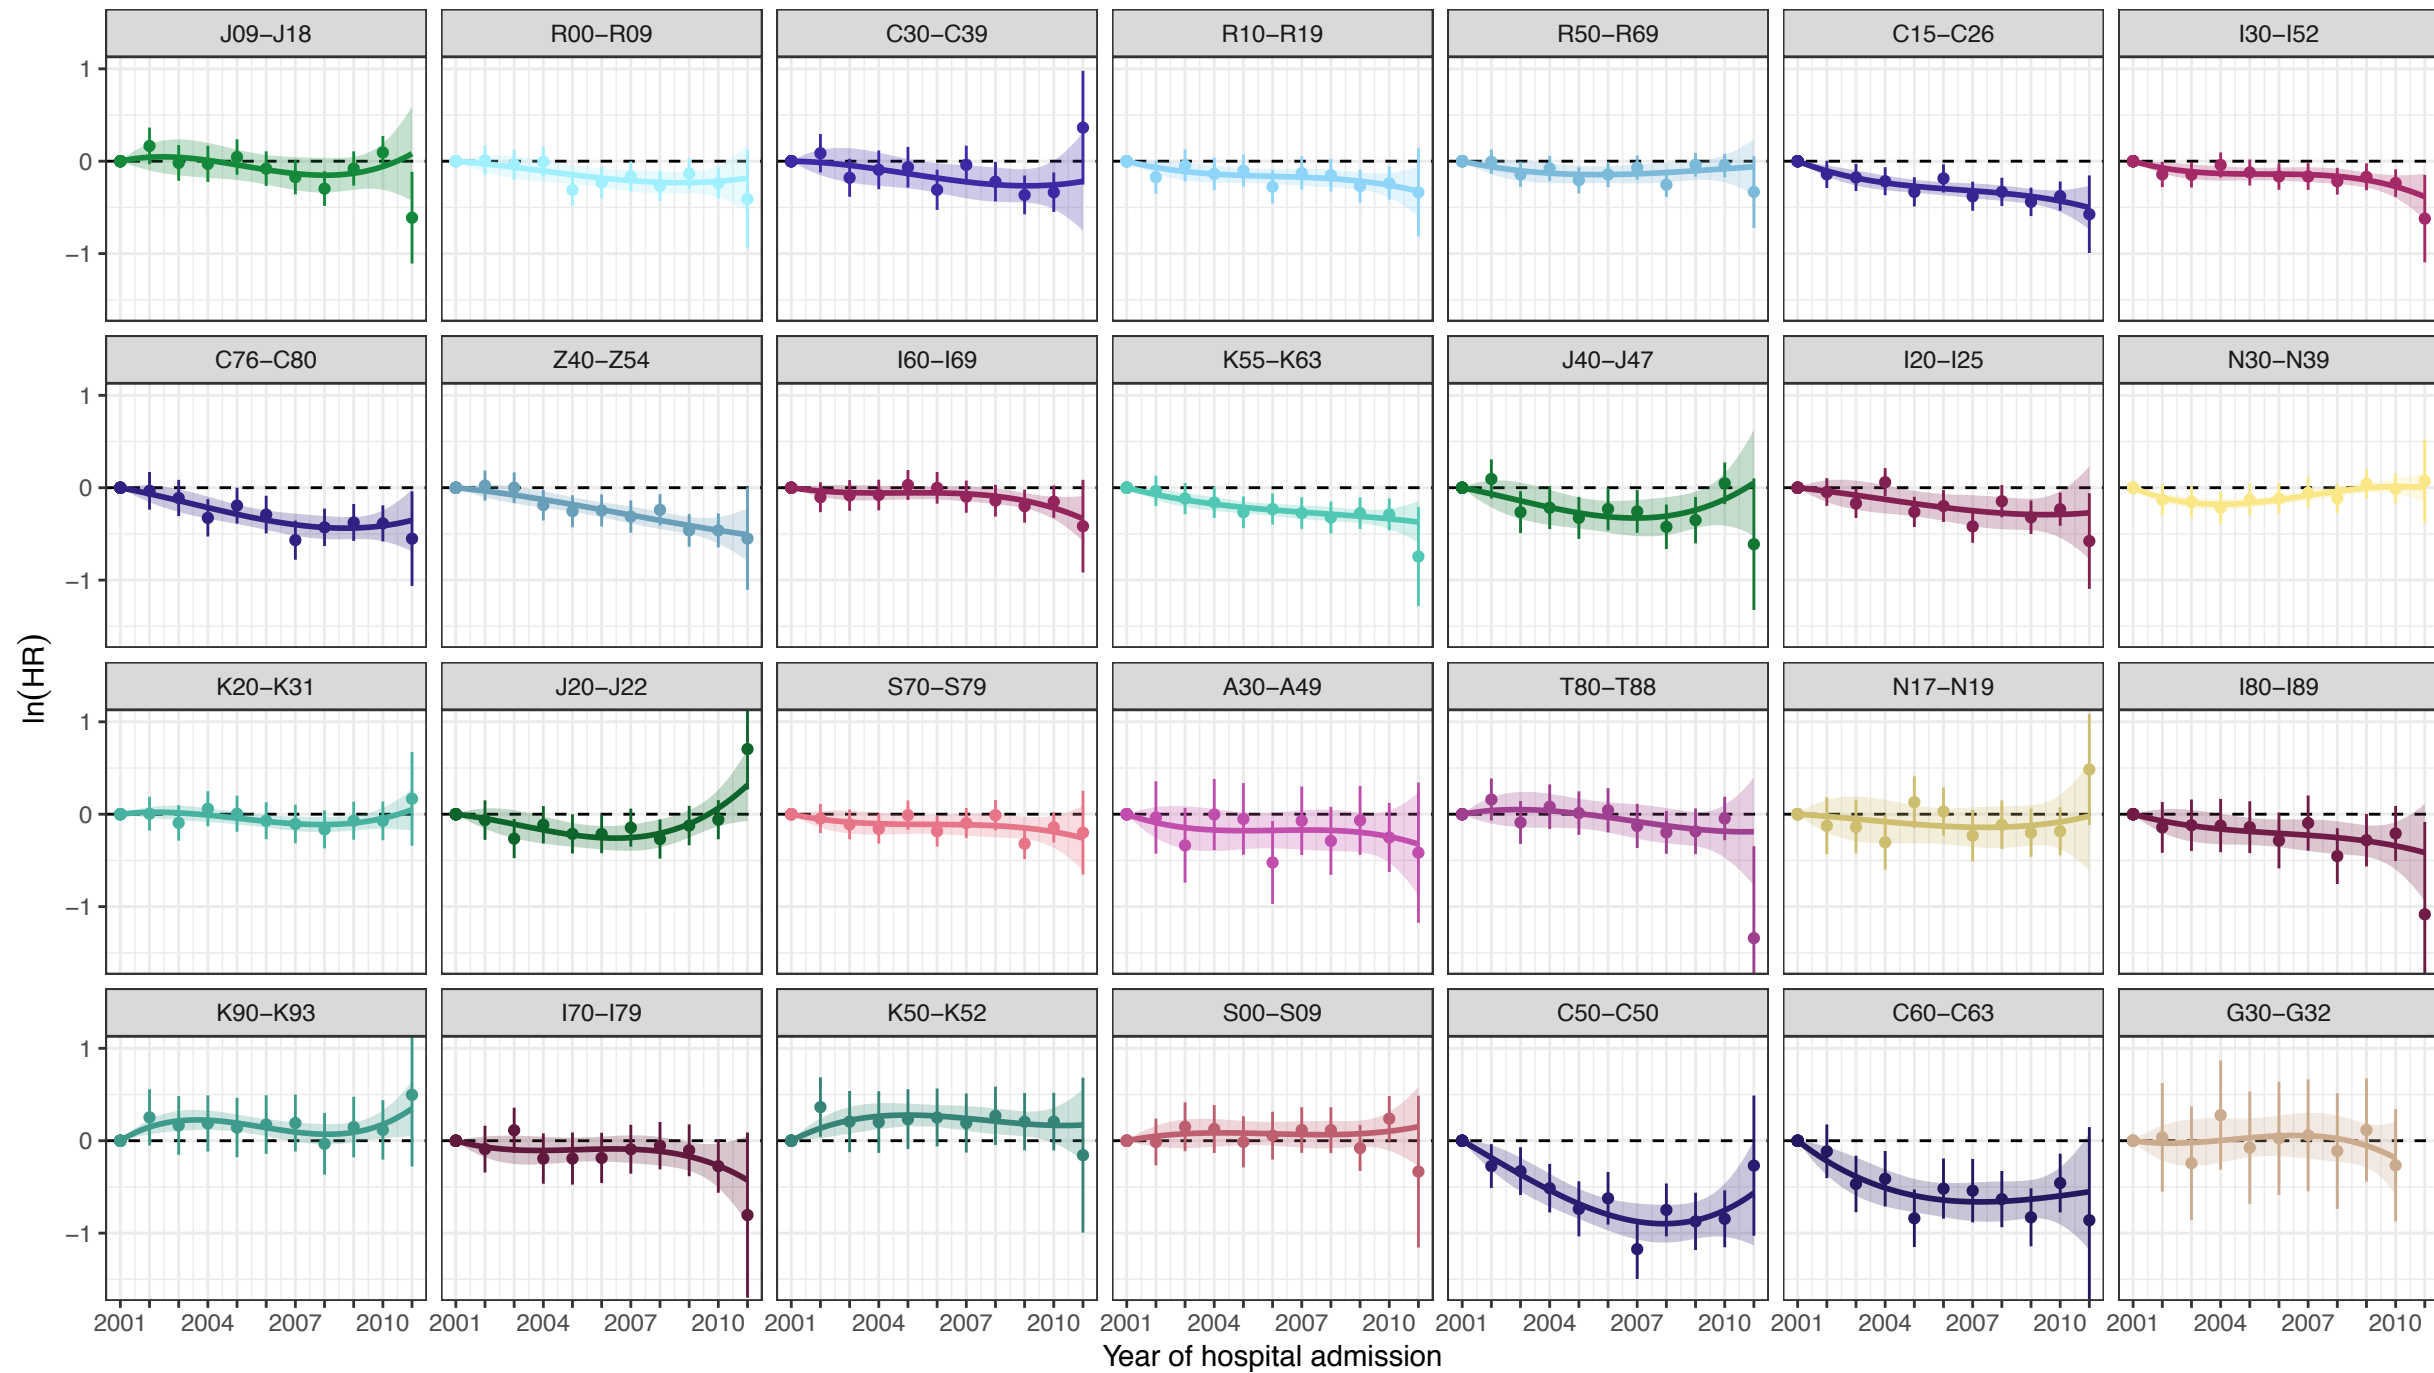

deprivation: 2

Five-year mortality compared to 2001

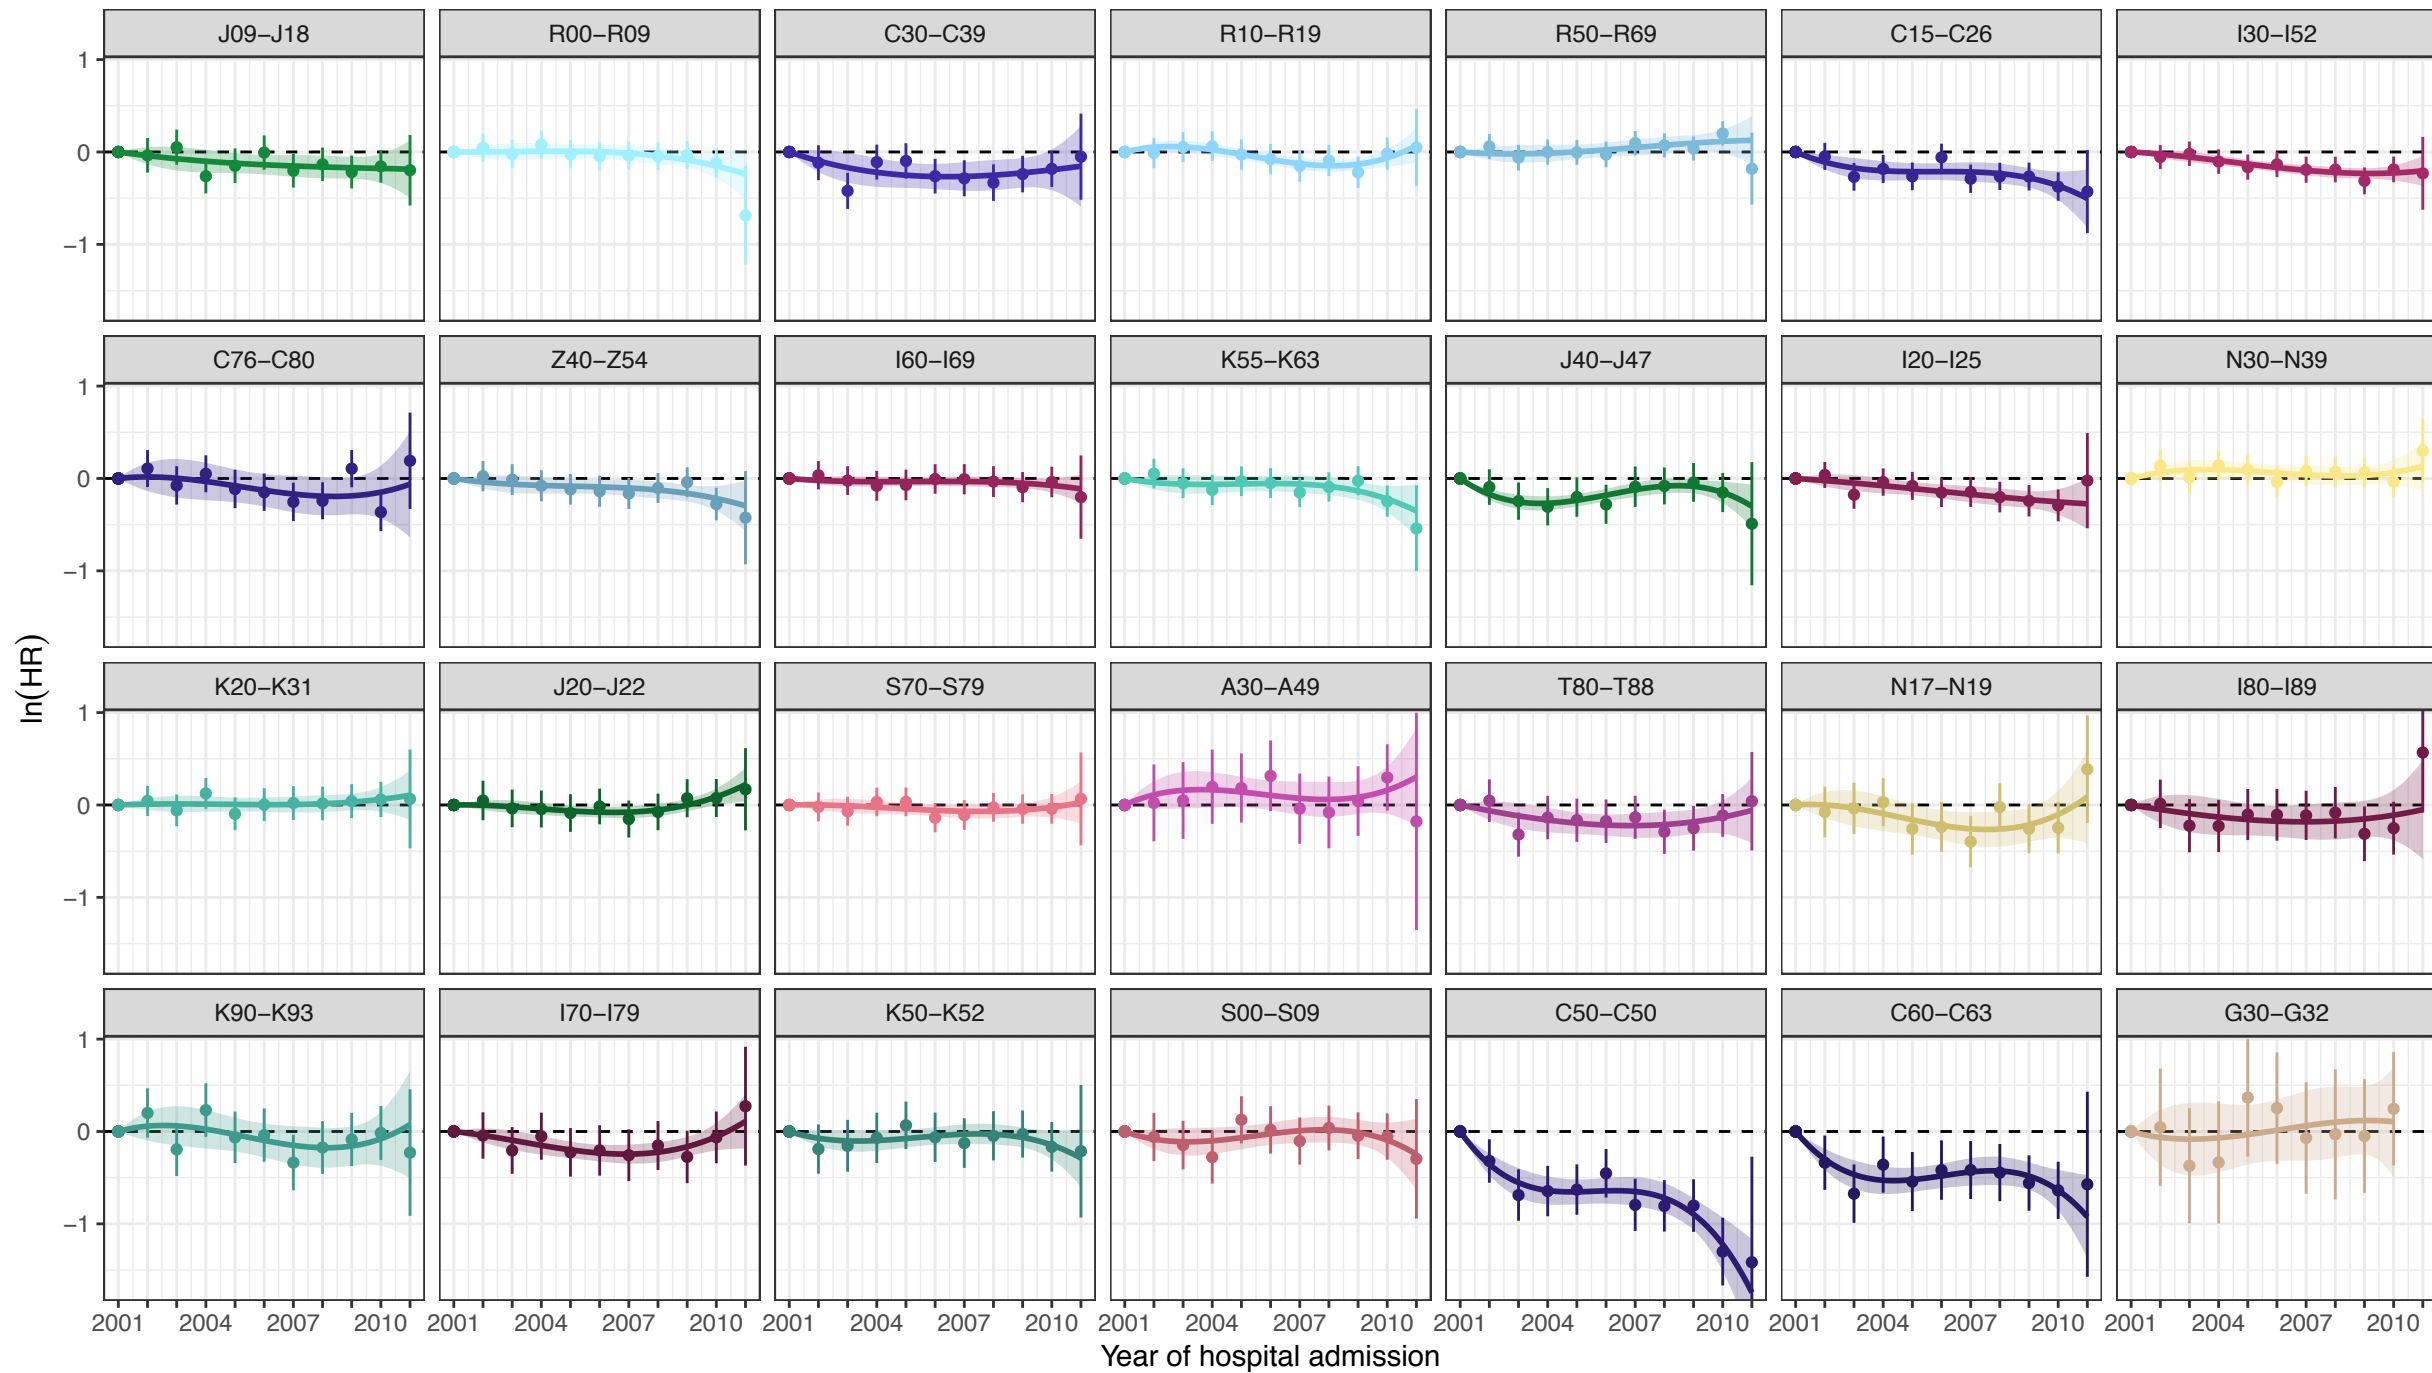

deprivation: 3

Five-year mortality compared to 2001

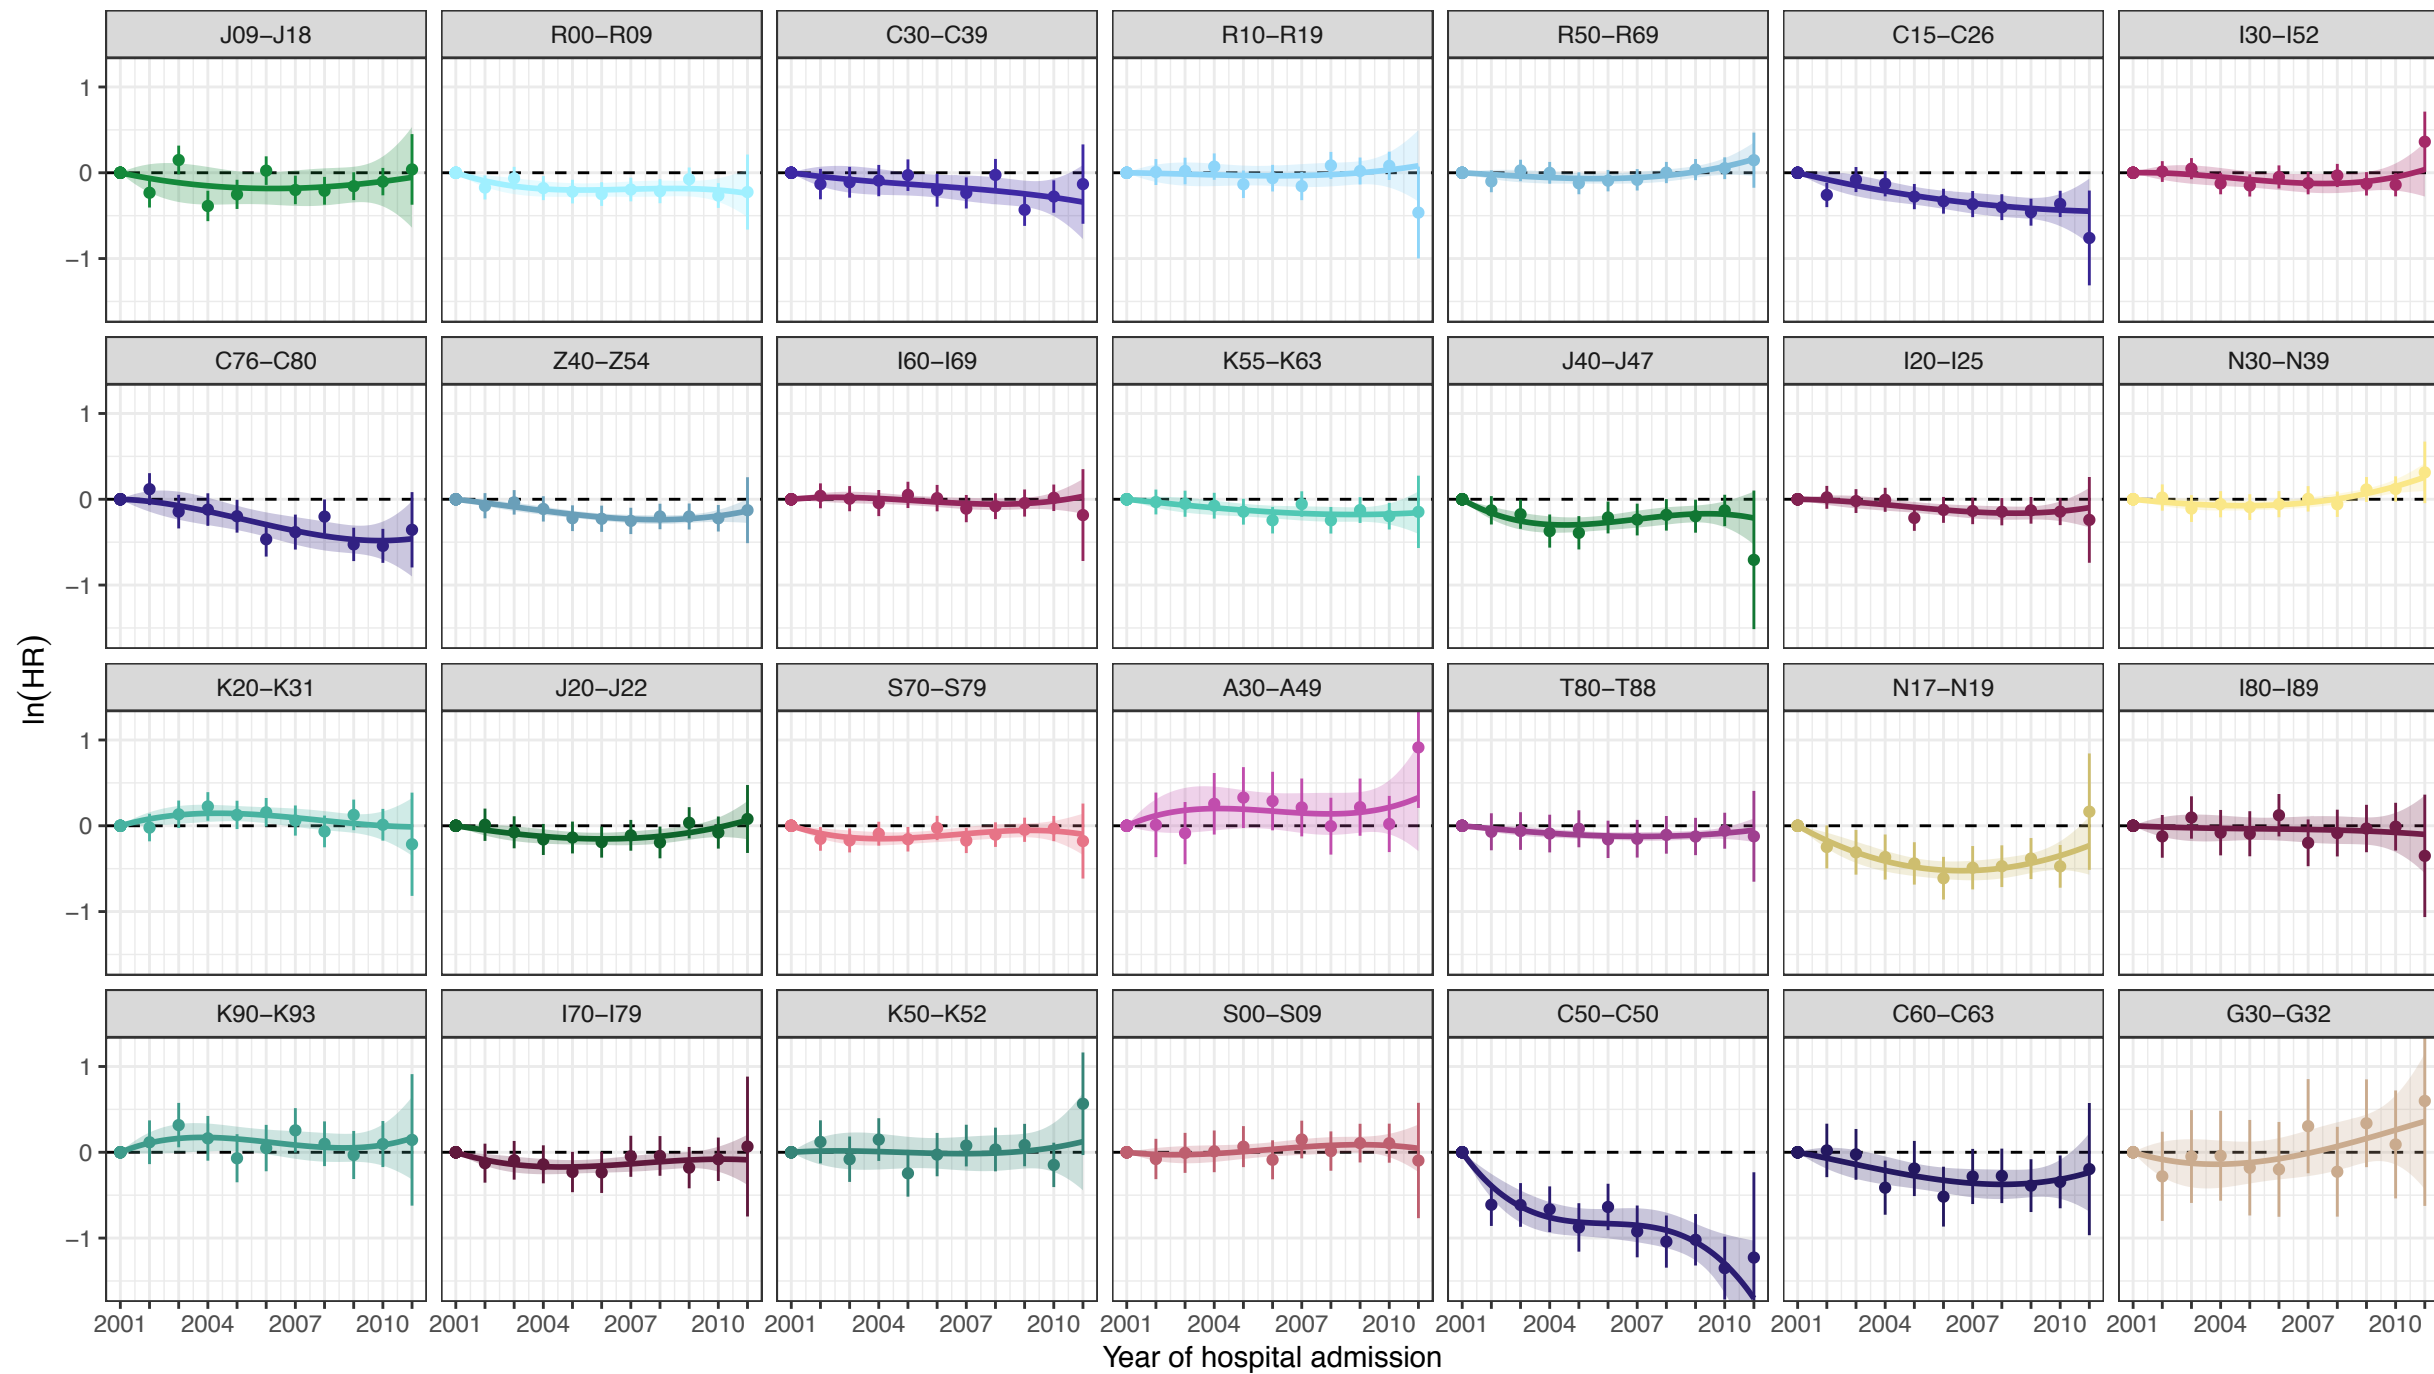

deprivation: 4

Five-year mortality compared to 2001

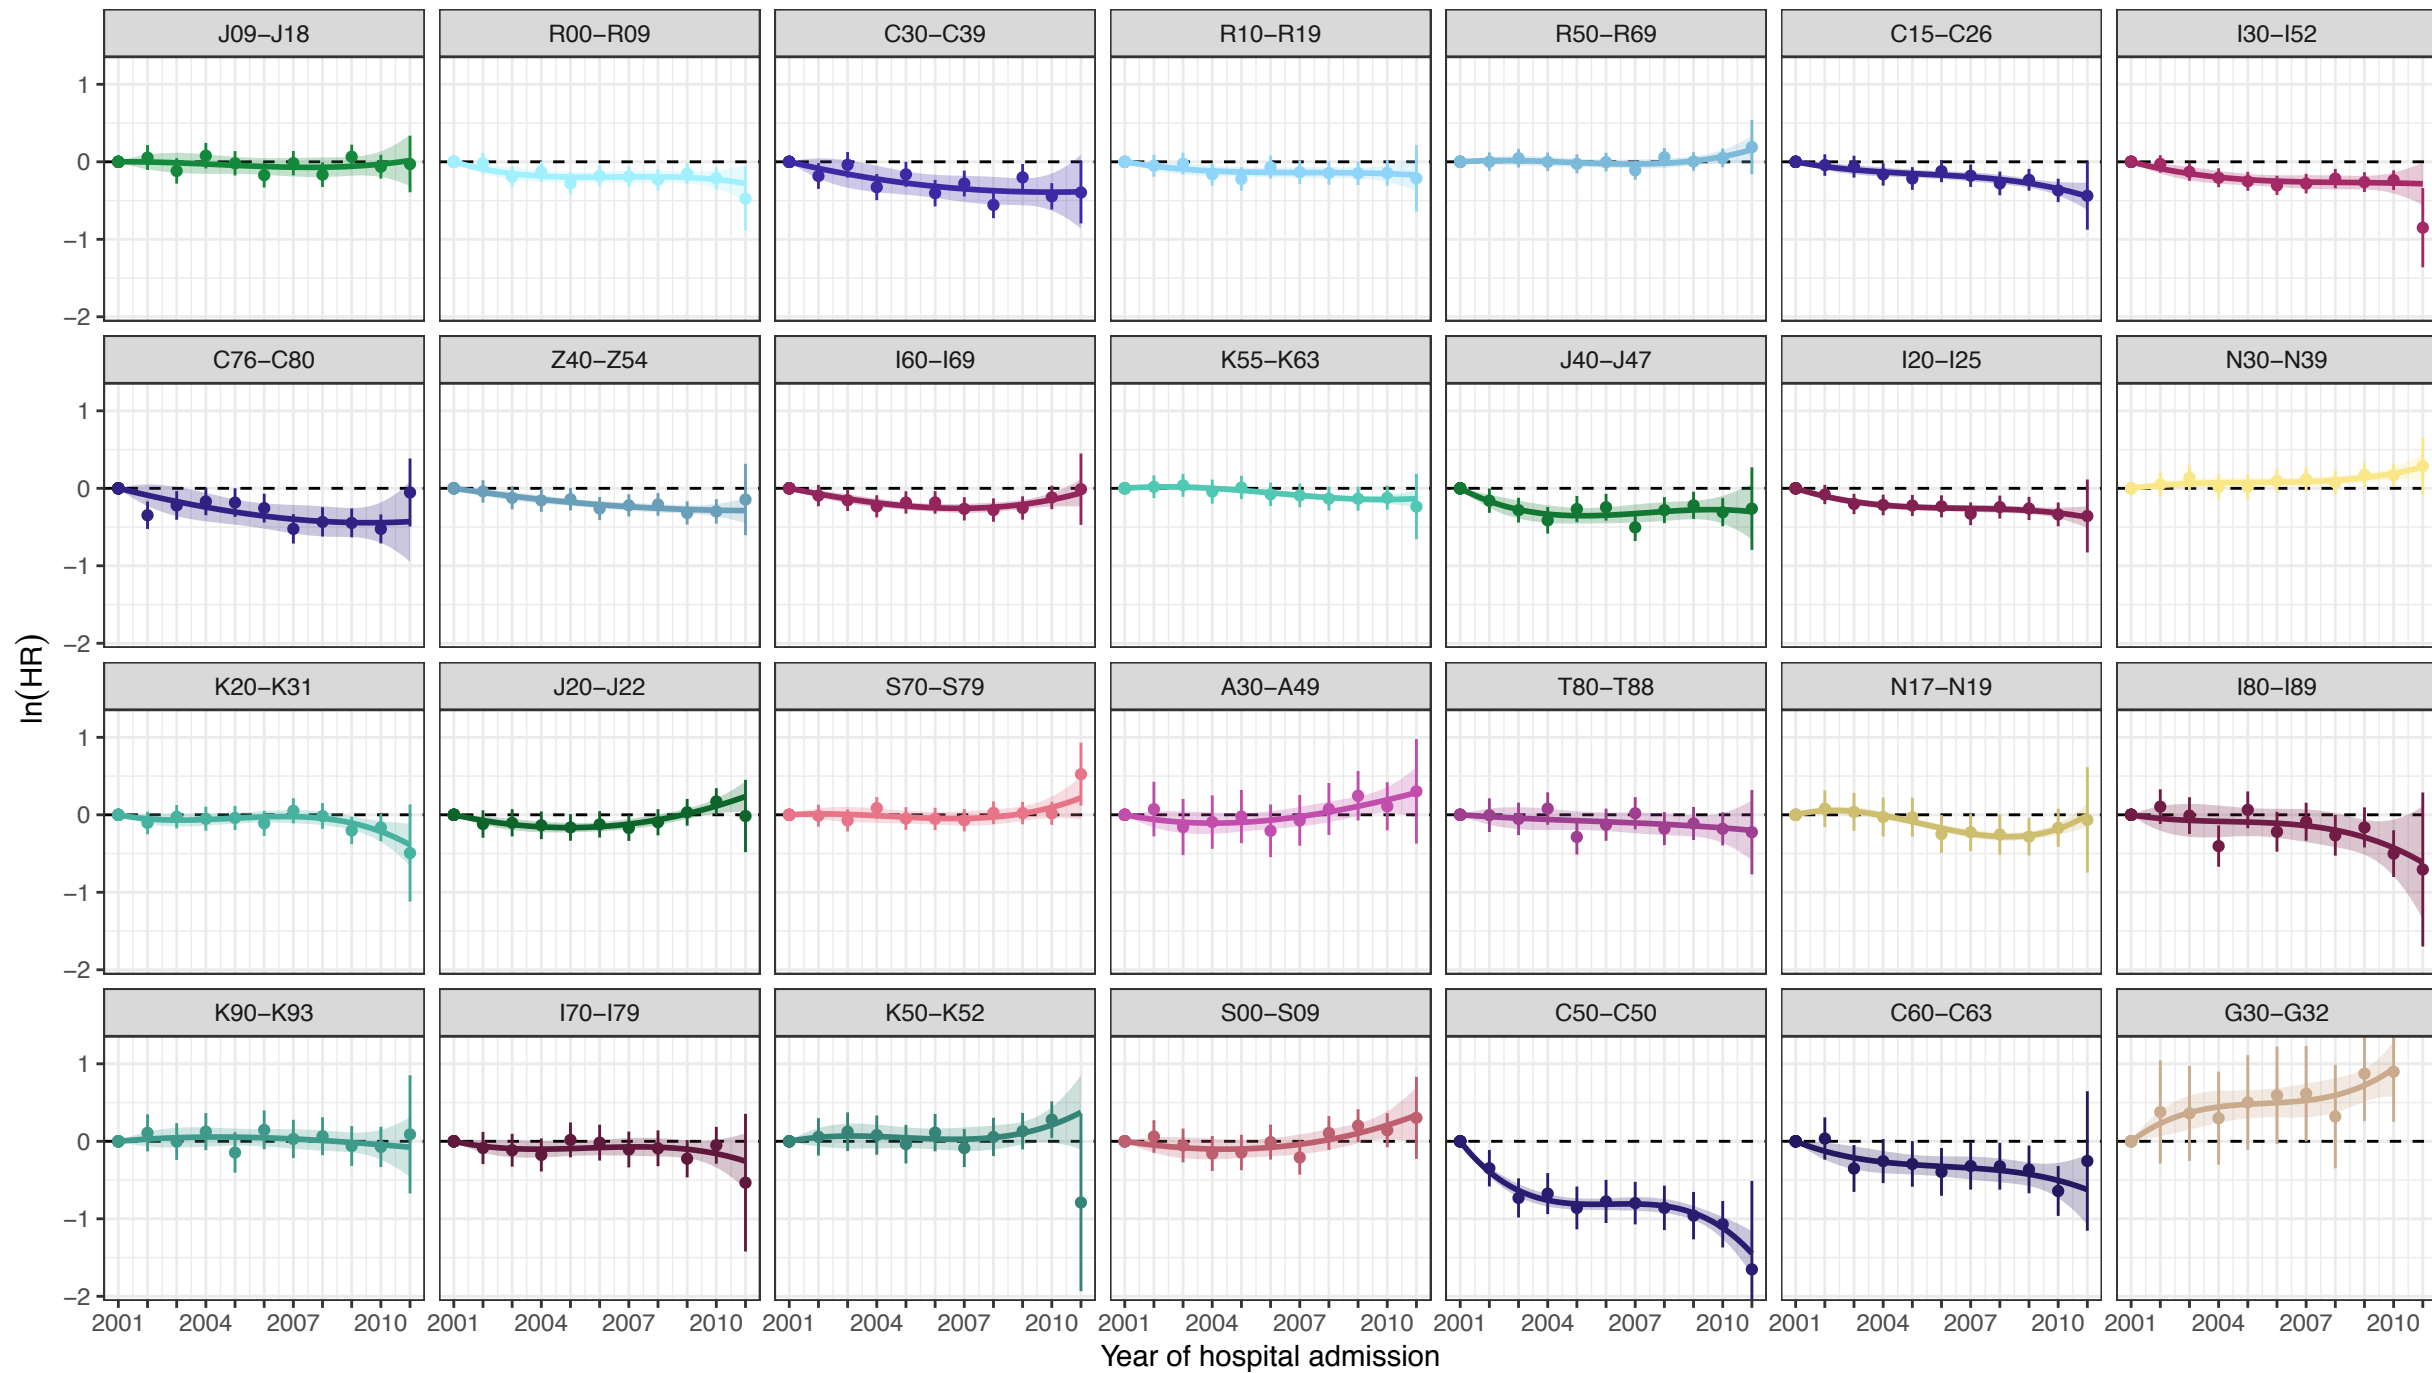

deprivation: 5

Five-year mortality compared to 2001

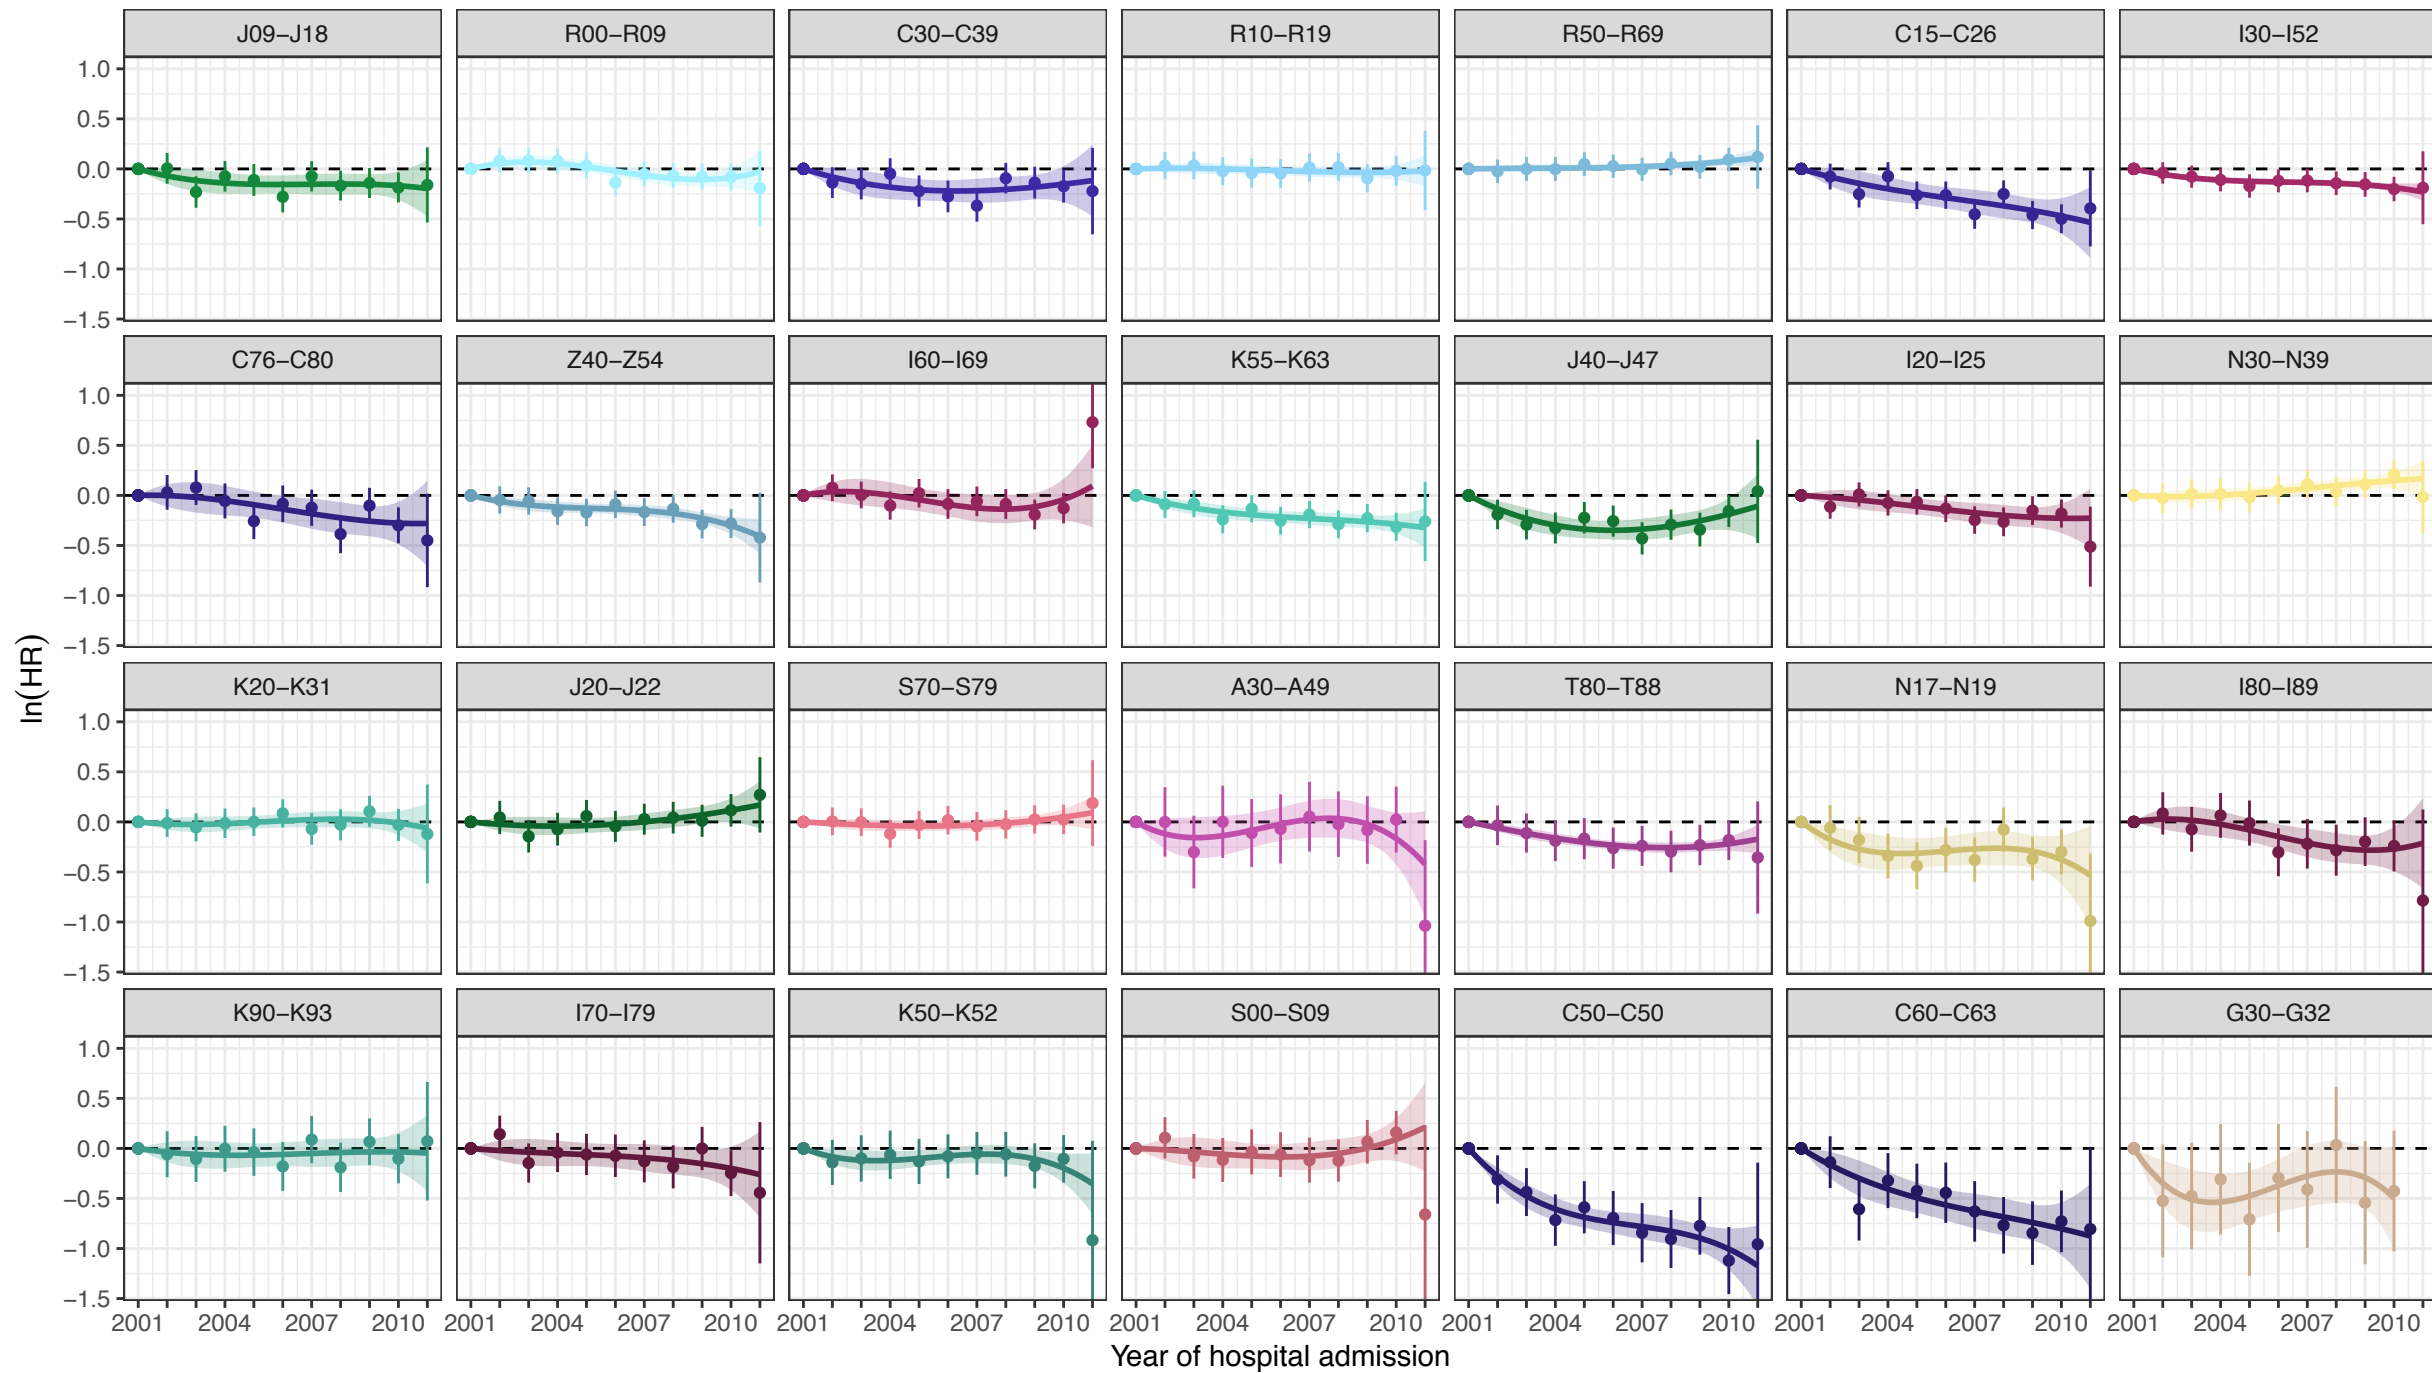

deprivation: 6

Five-year mortality compared to 2001

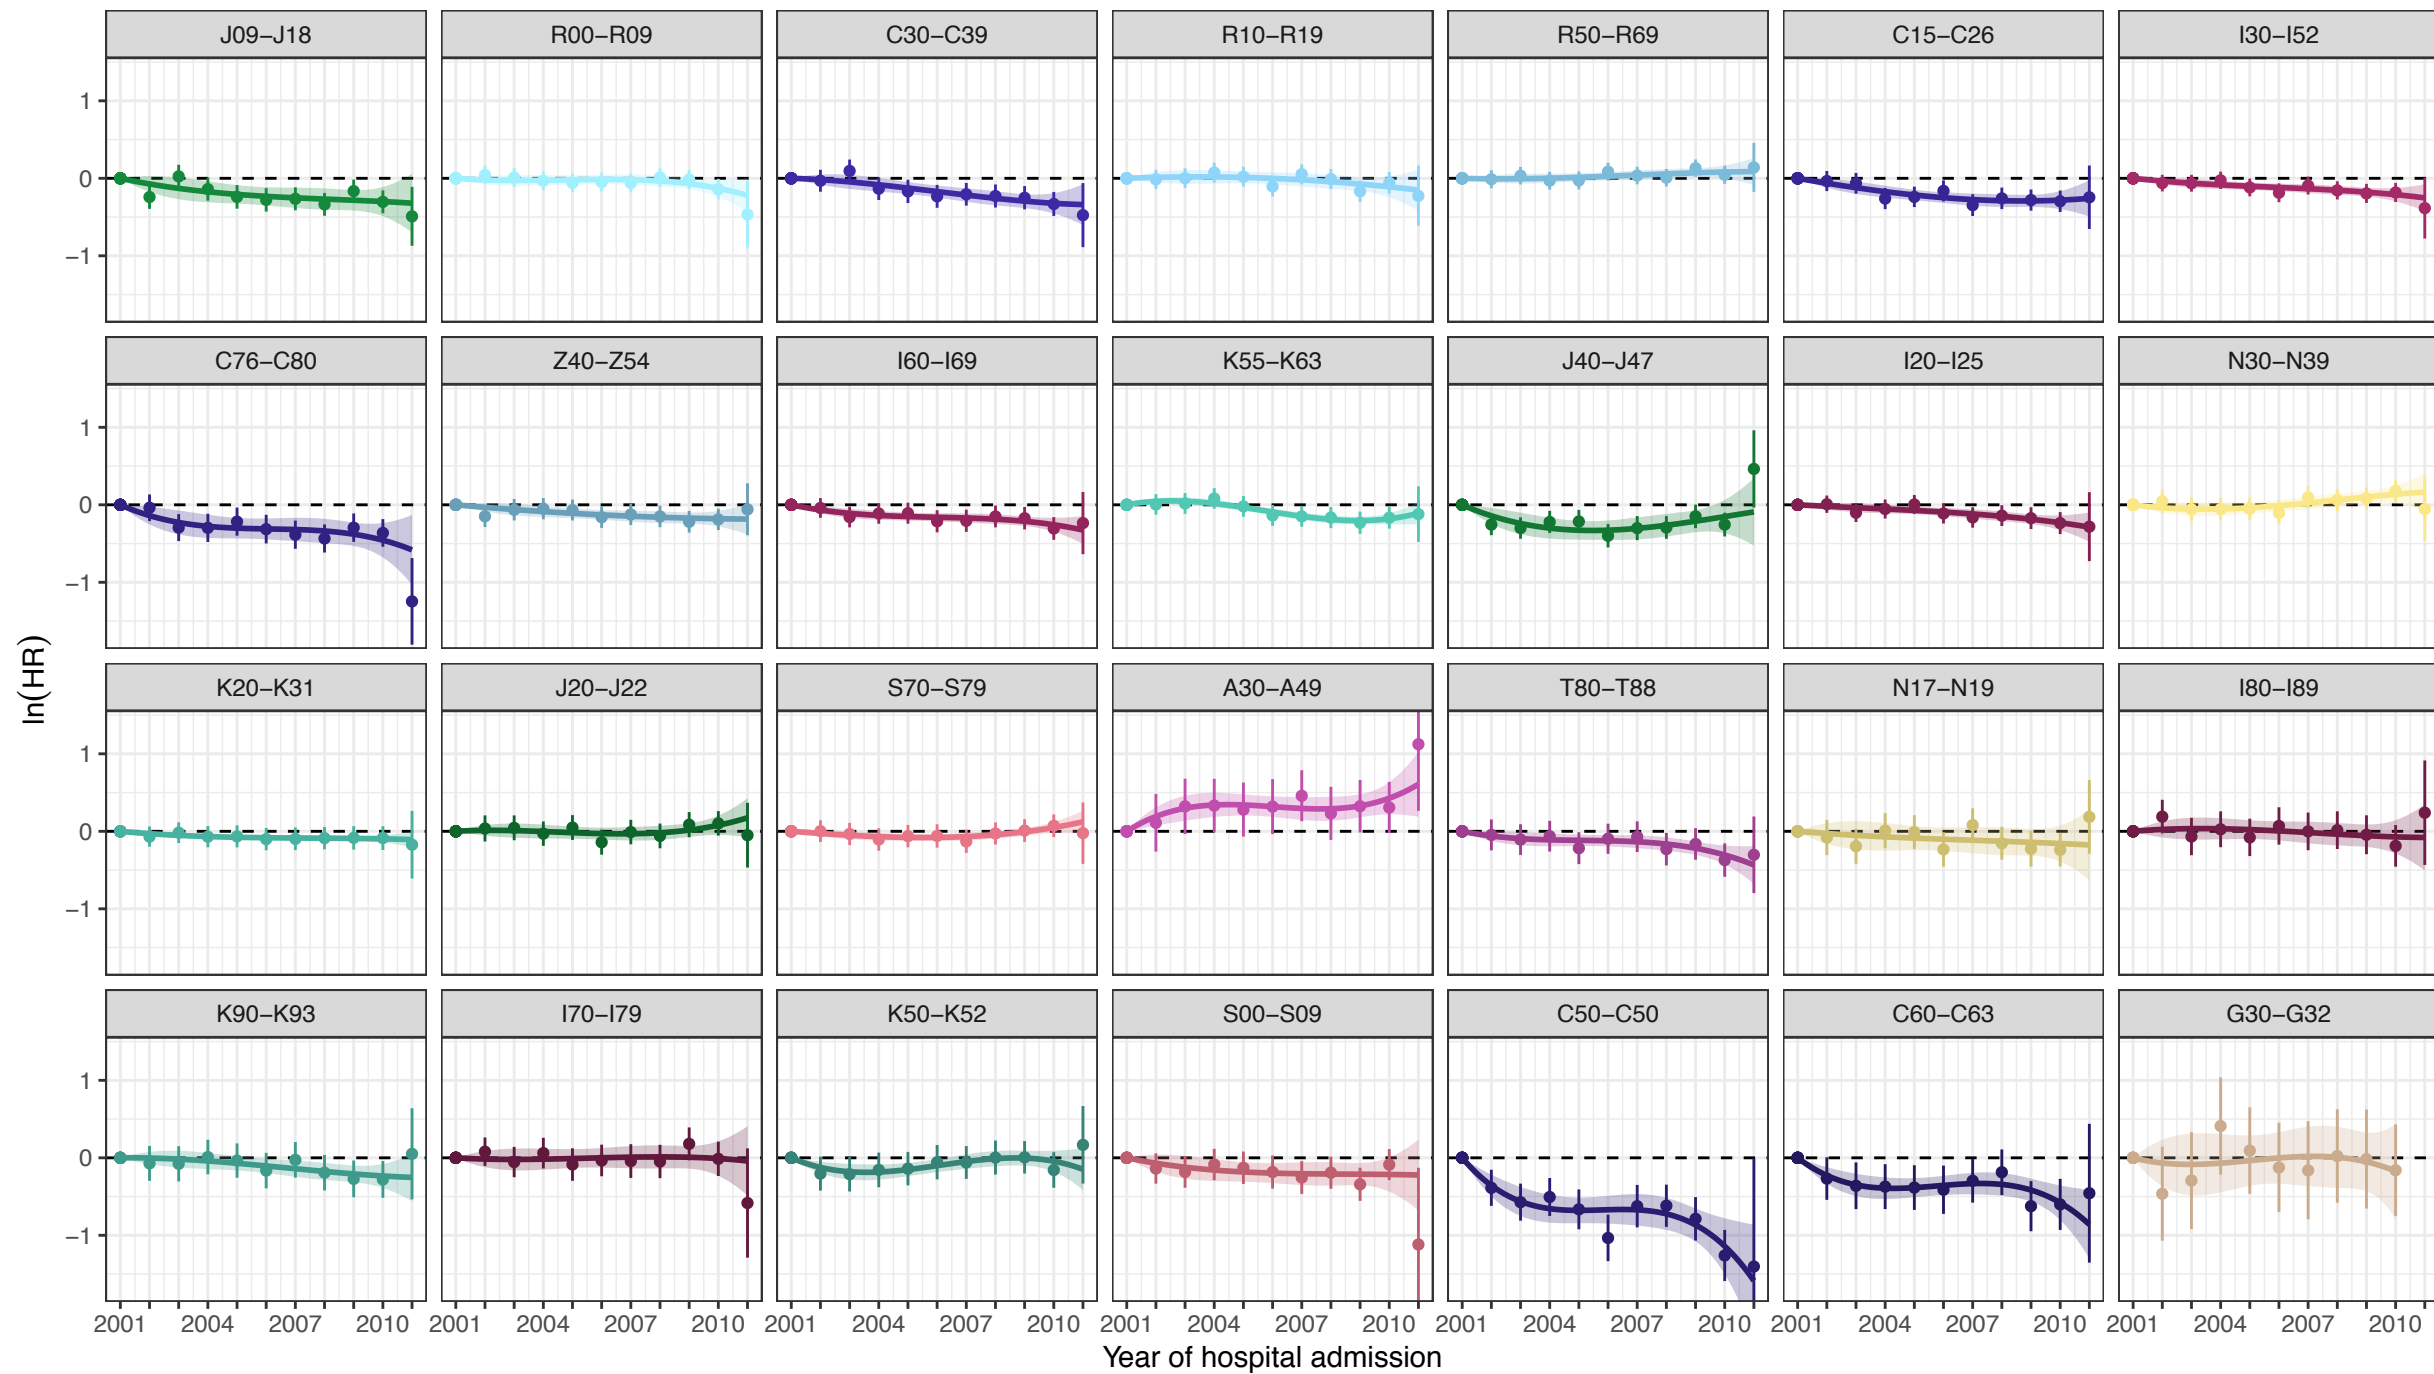



deprivation: 7

Five-year mortality compared to 2001

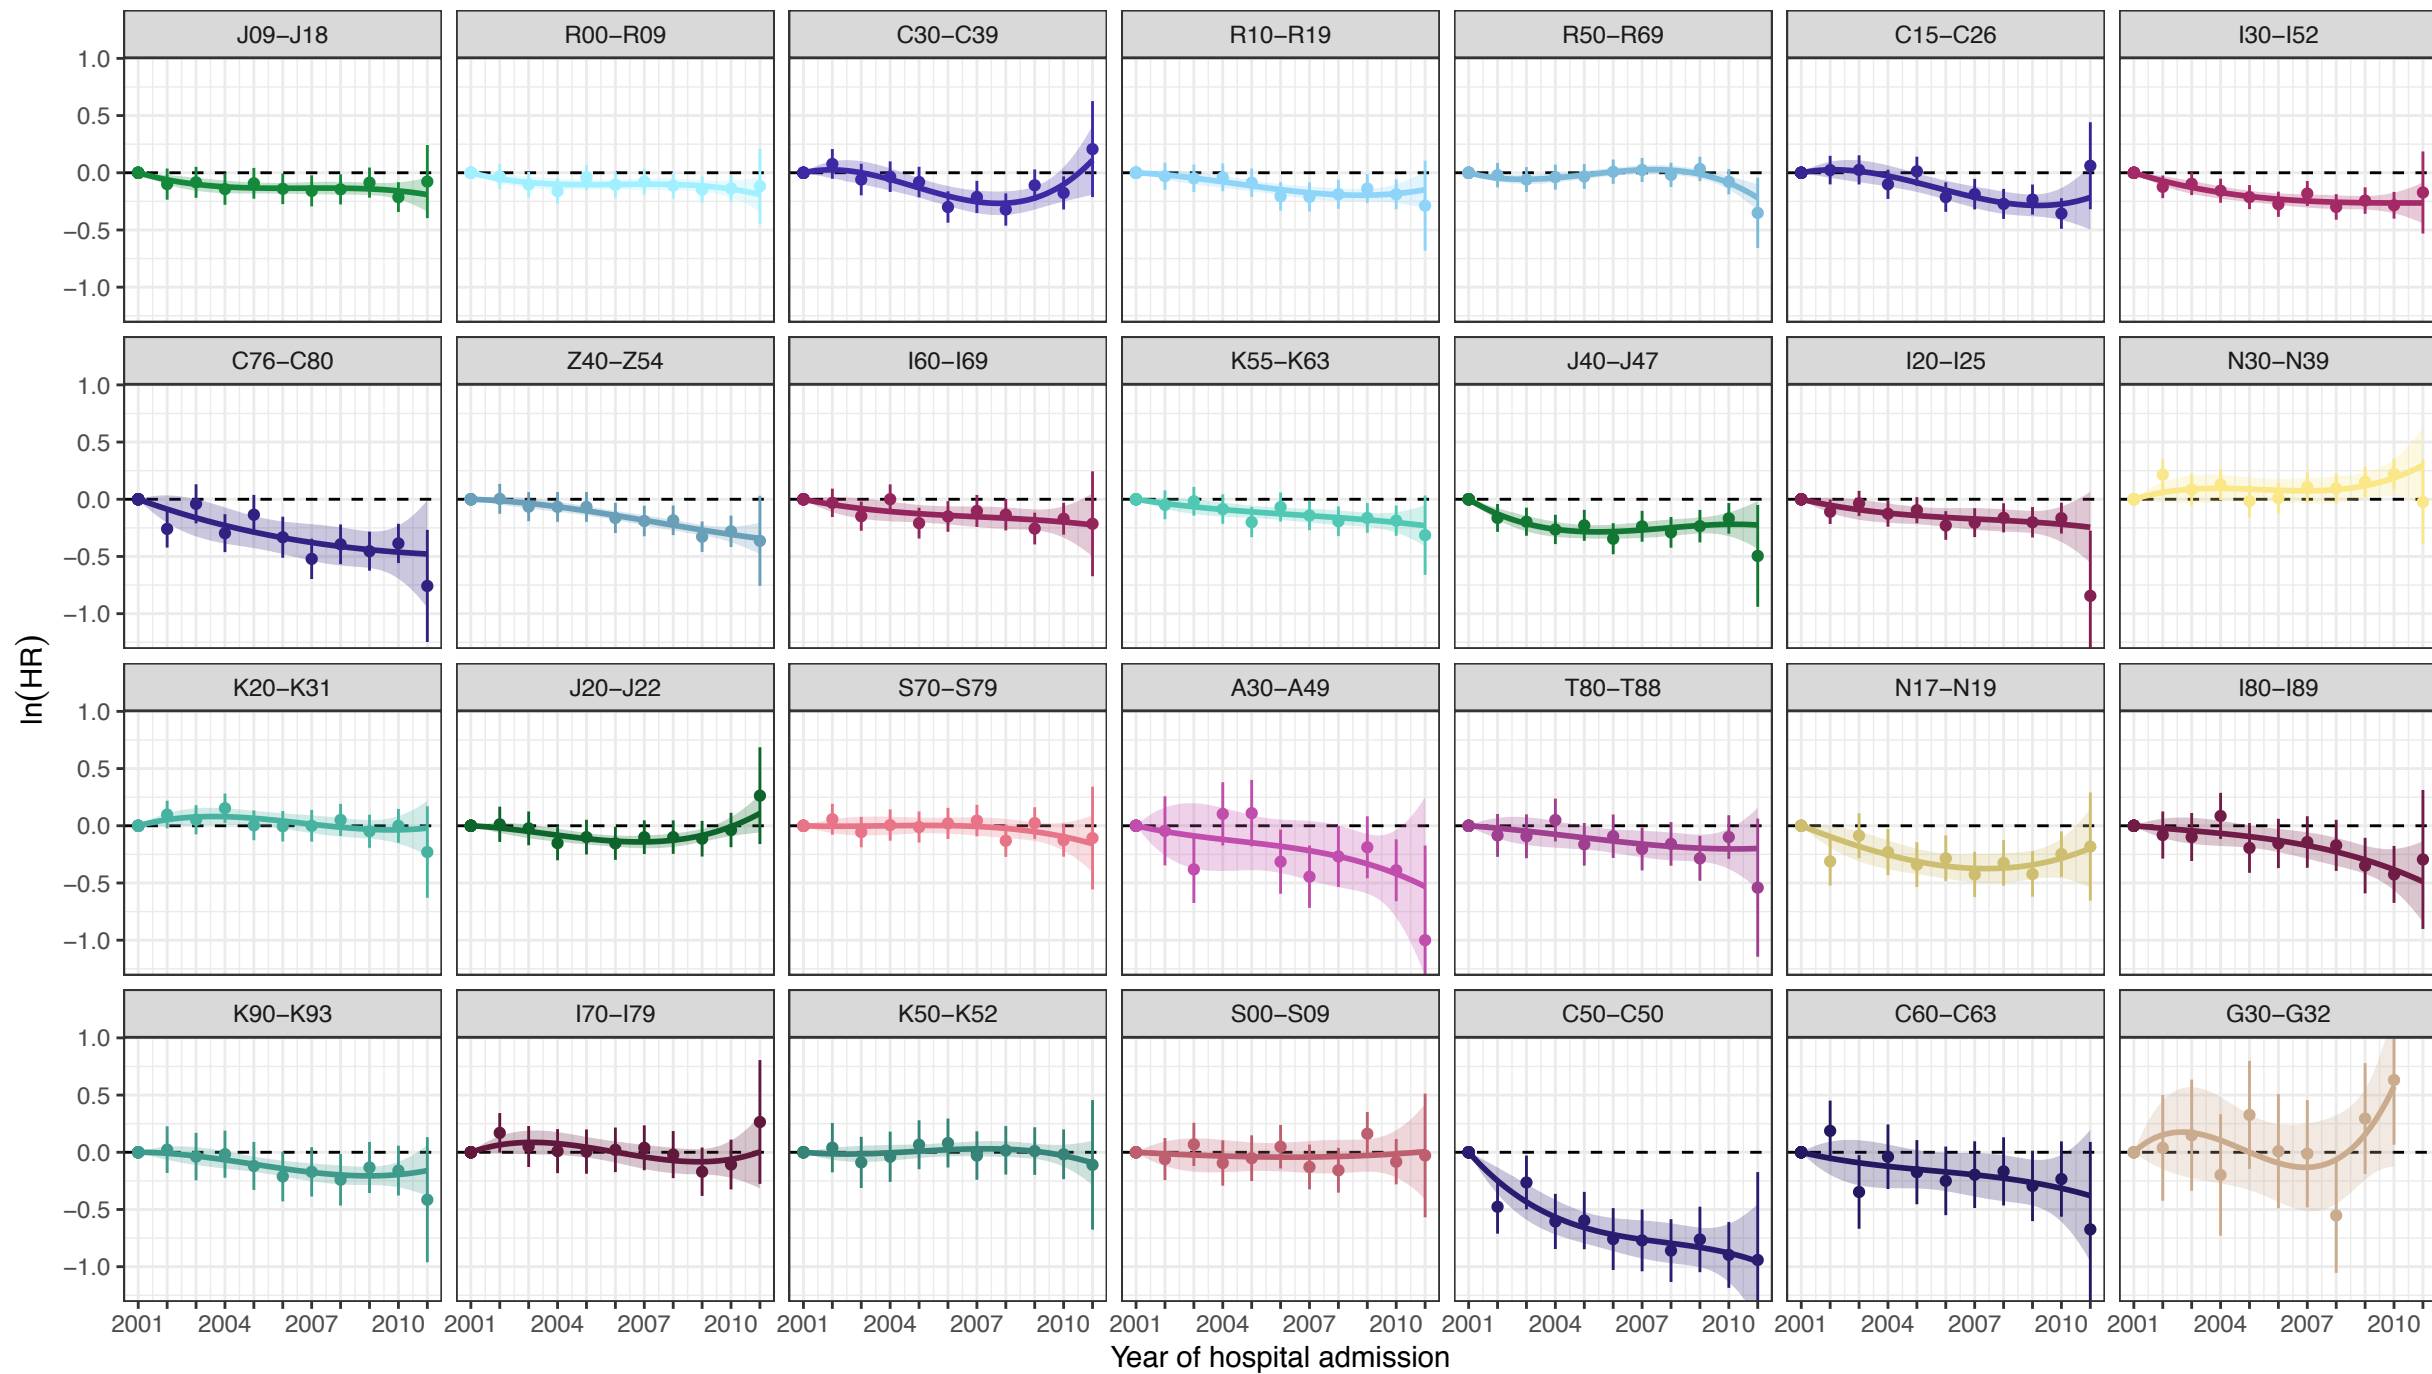

deprivation: 8

Five-year mortality compared to 2001

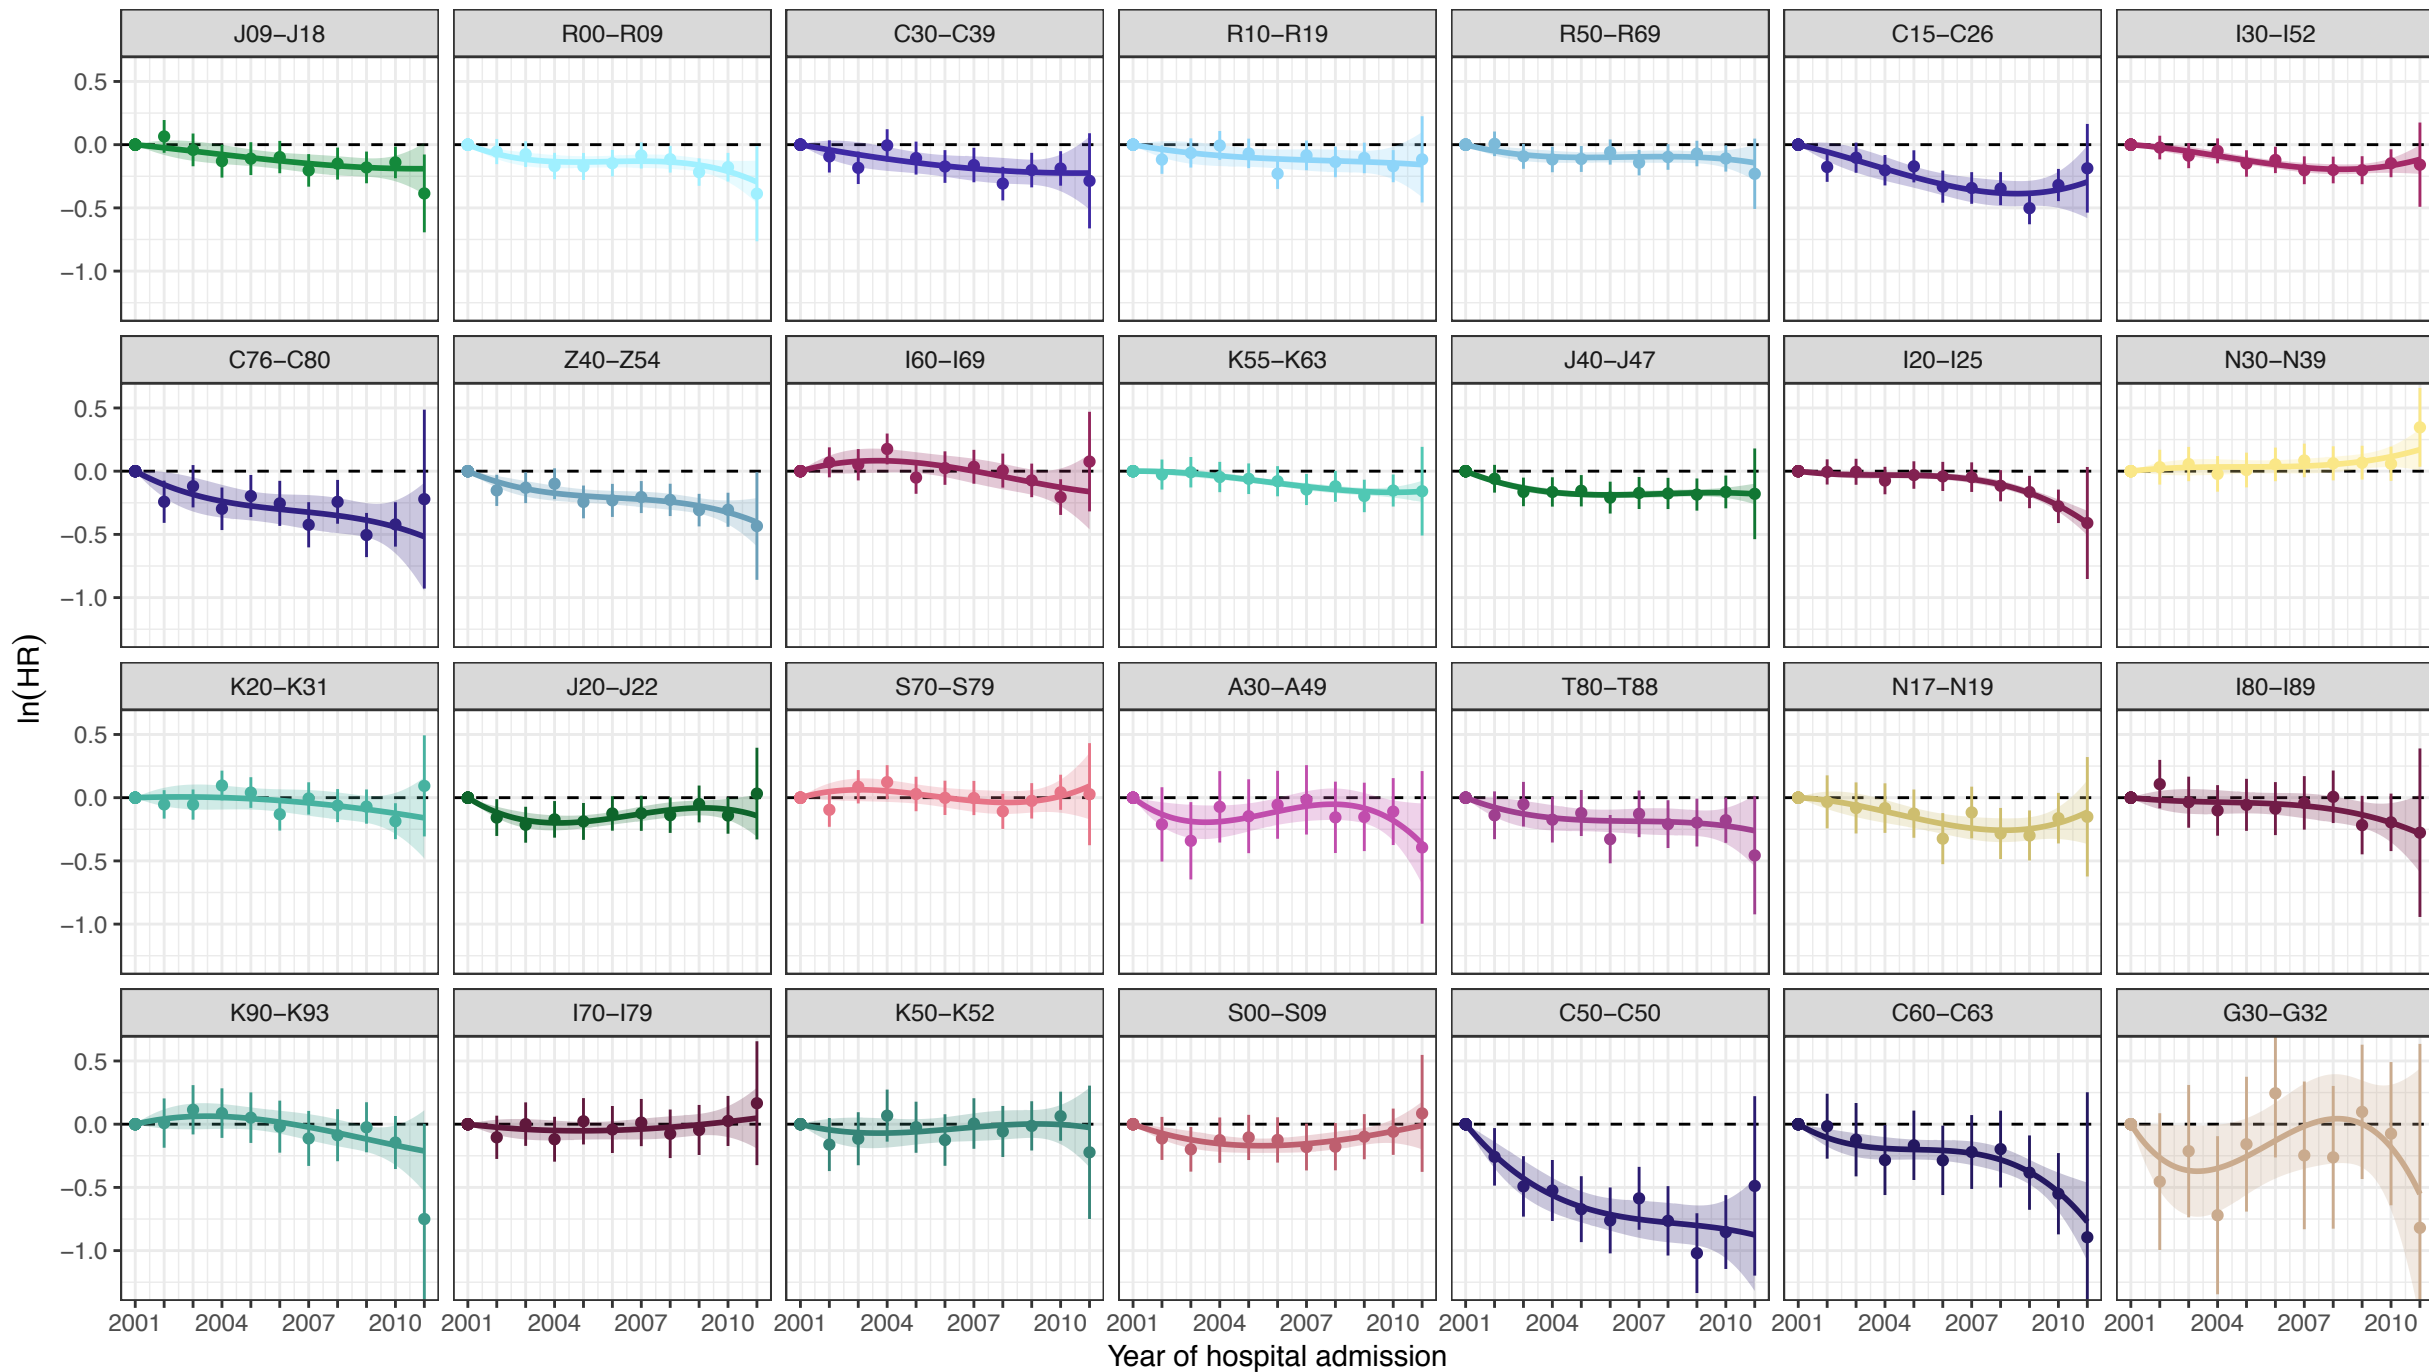

deprivation: 9

Five-year mortality compared to 2001

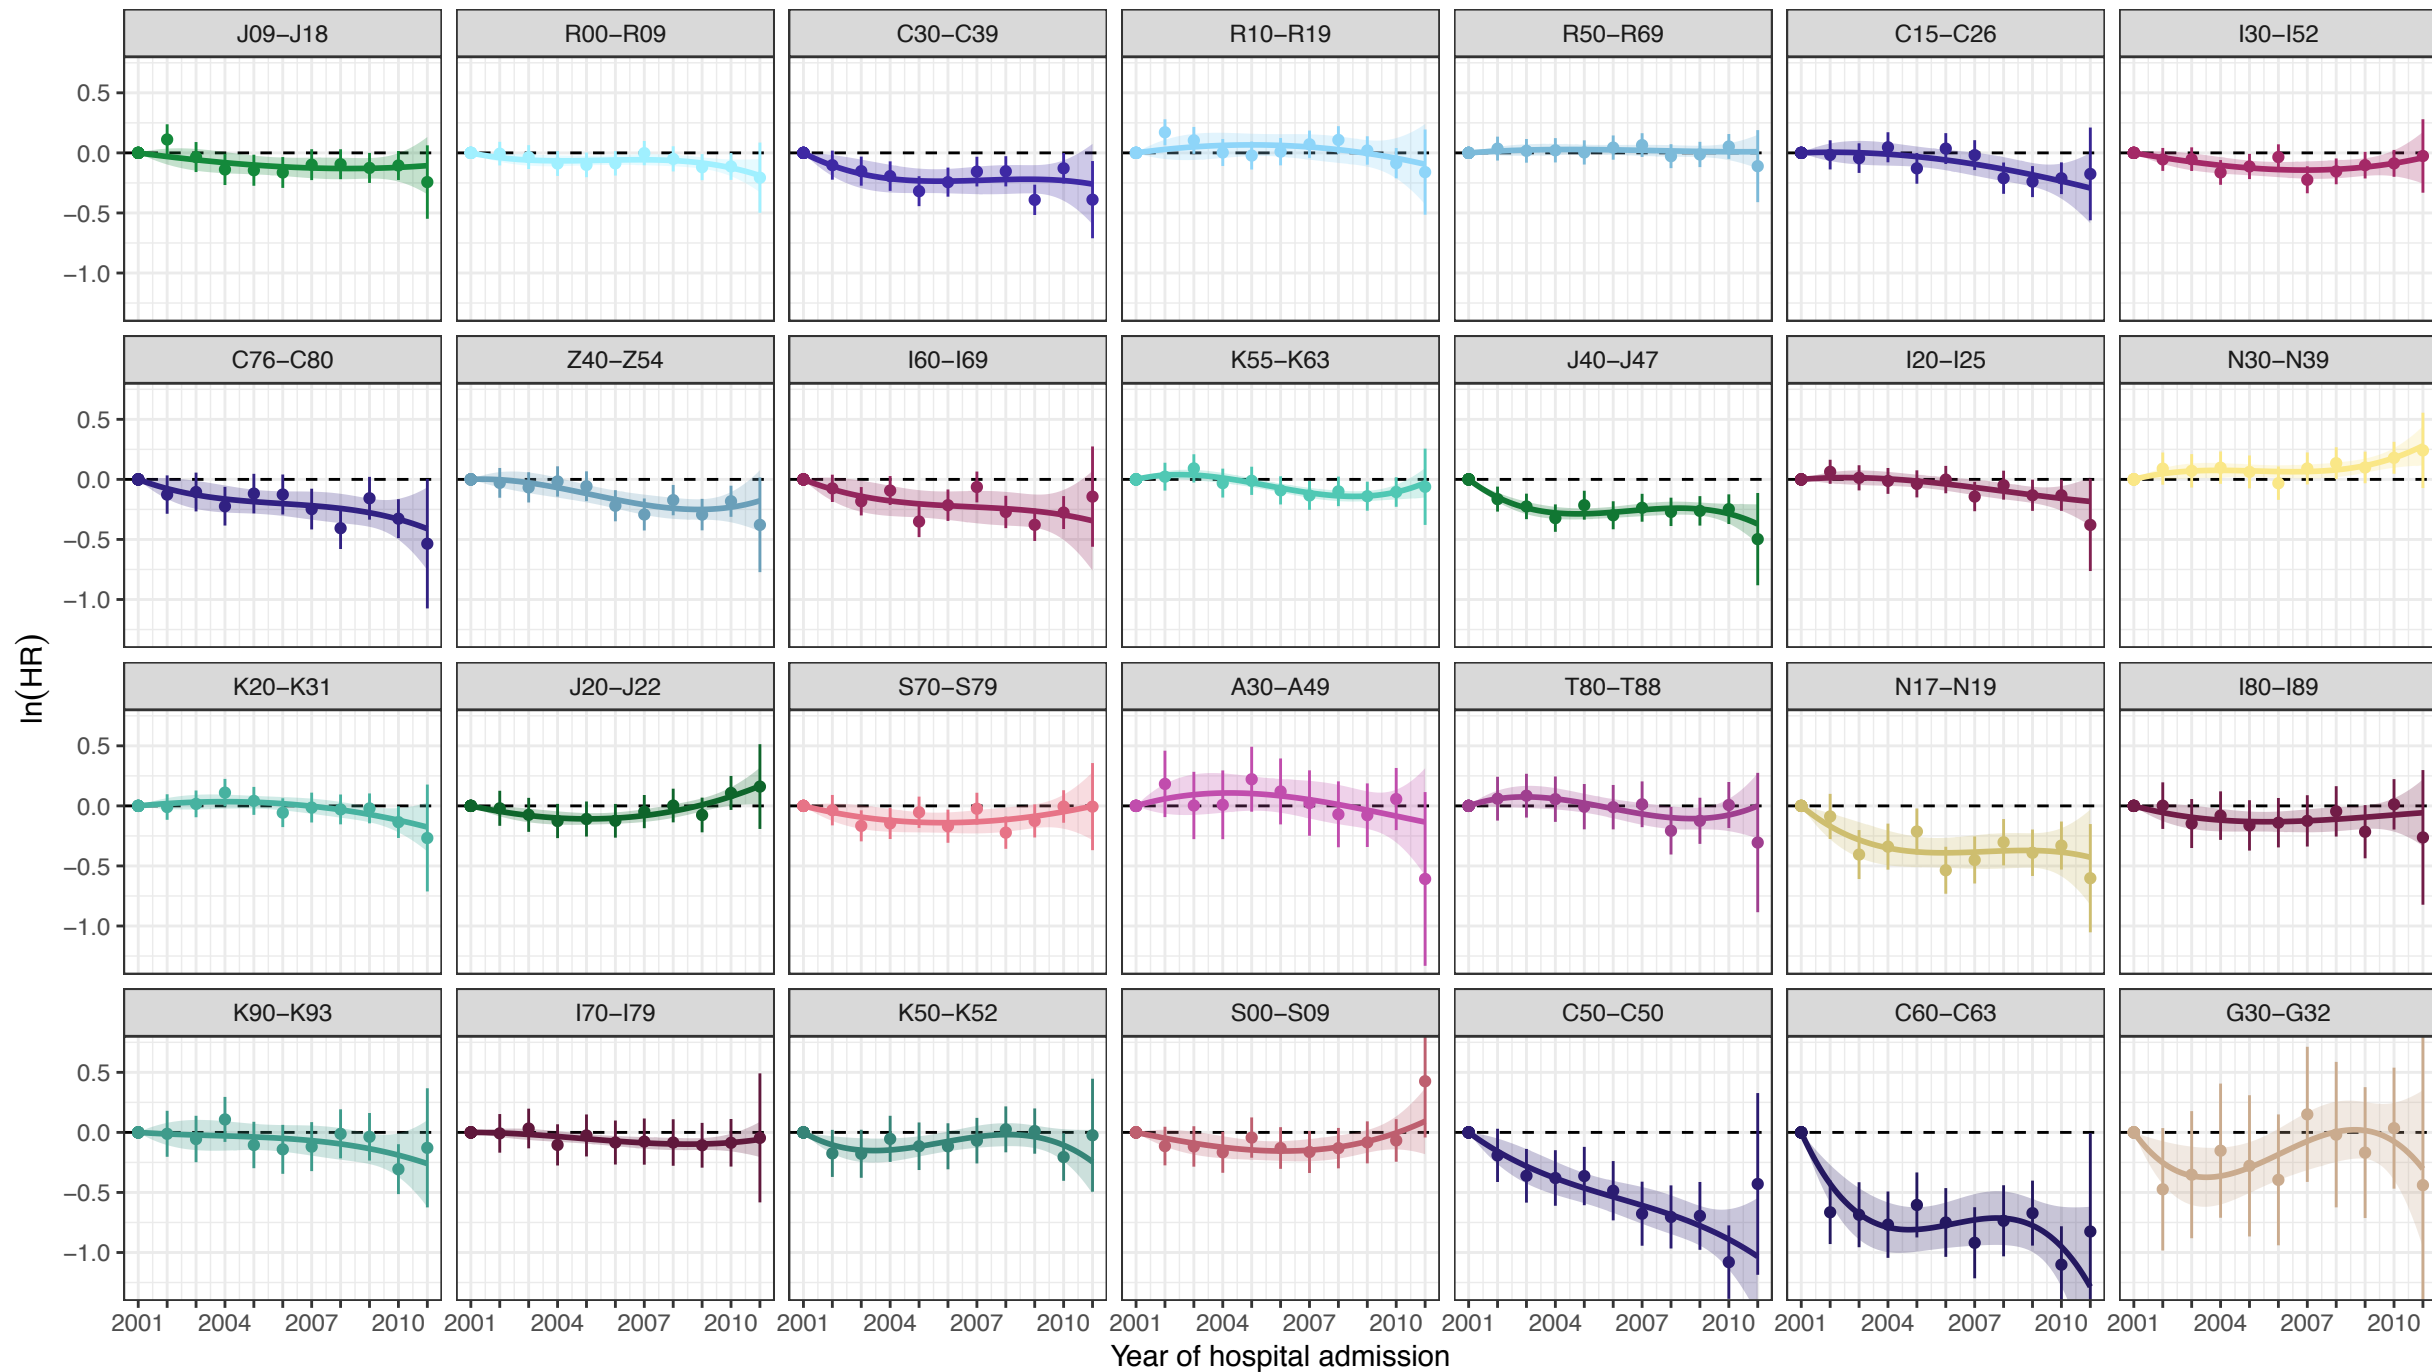

deprivation: 10

Five-year mortality compared to 2001

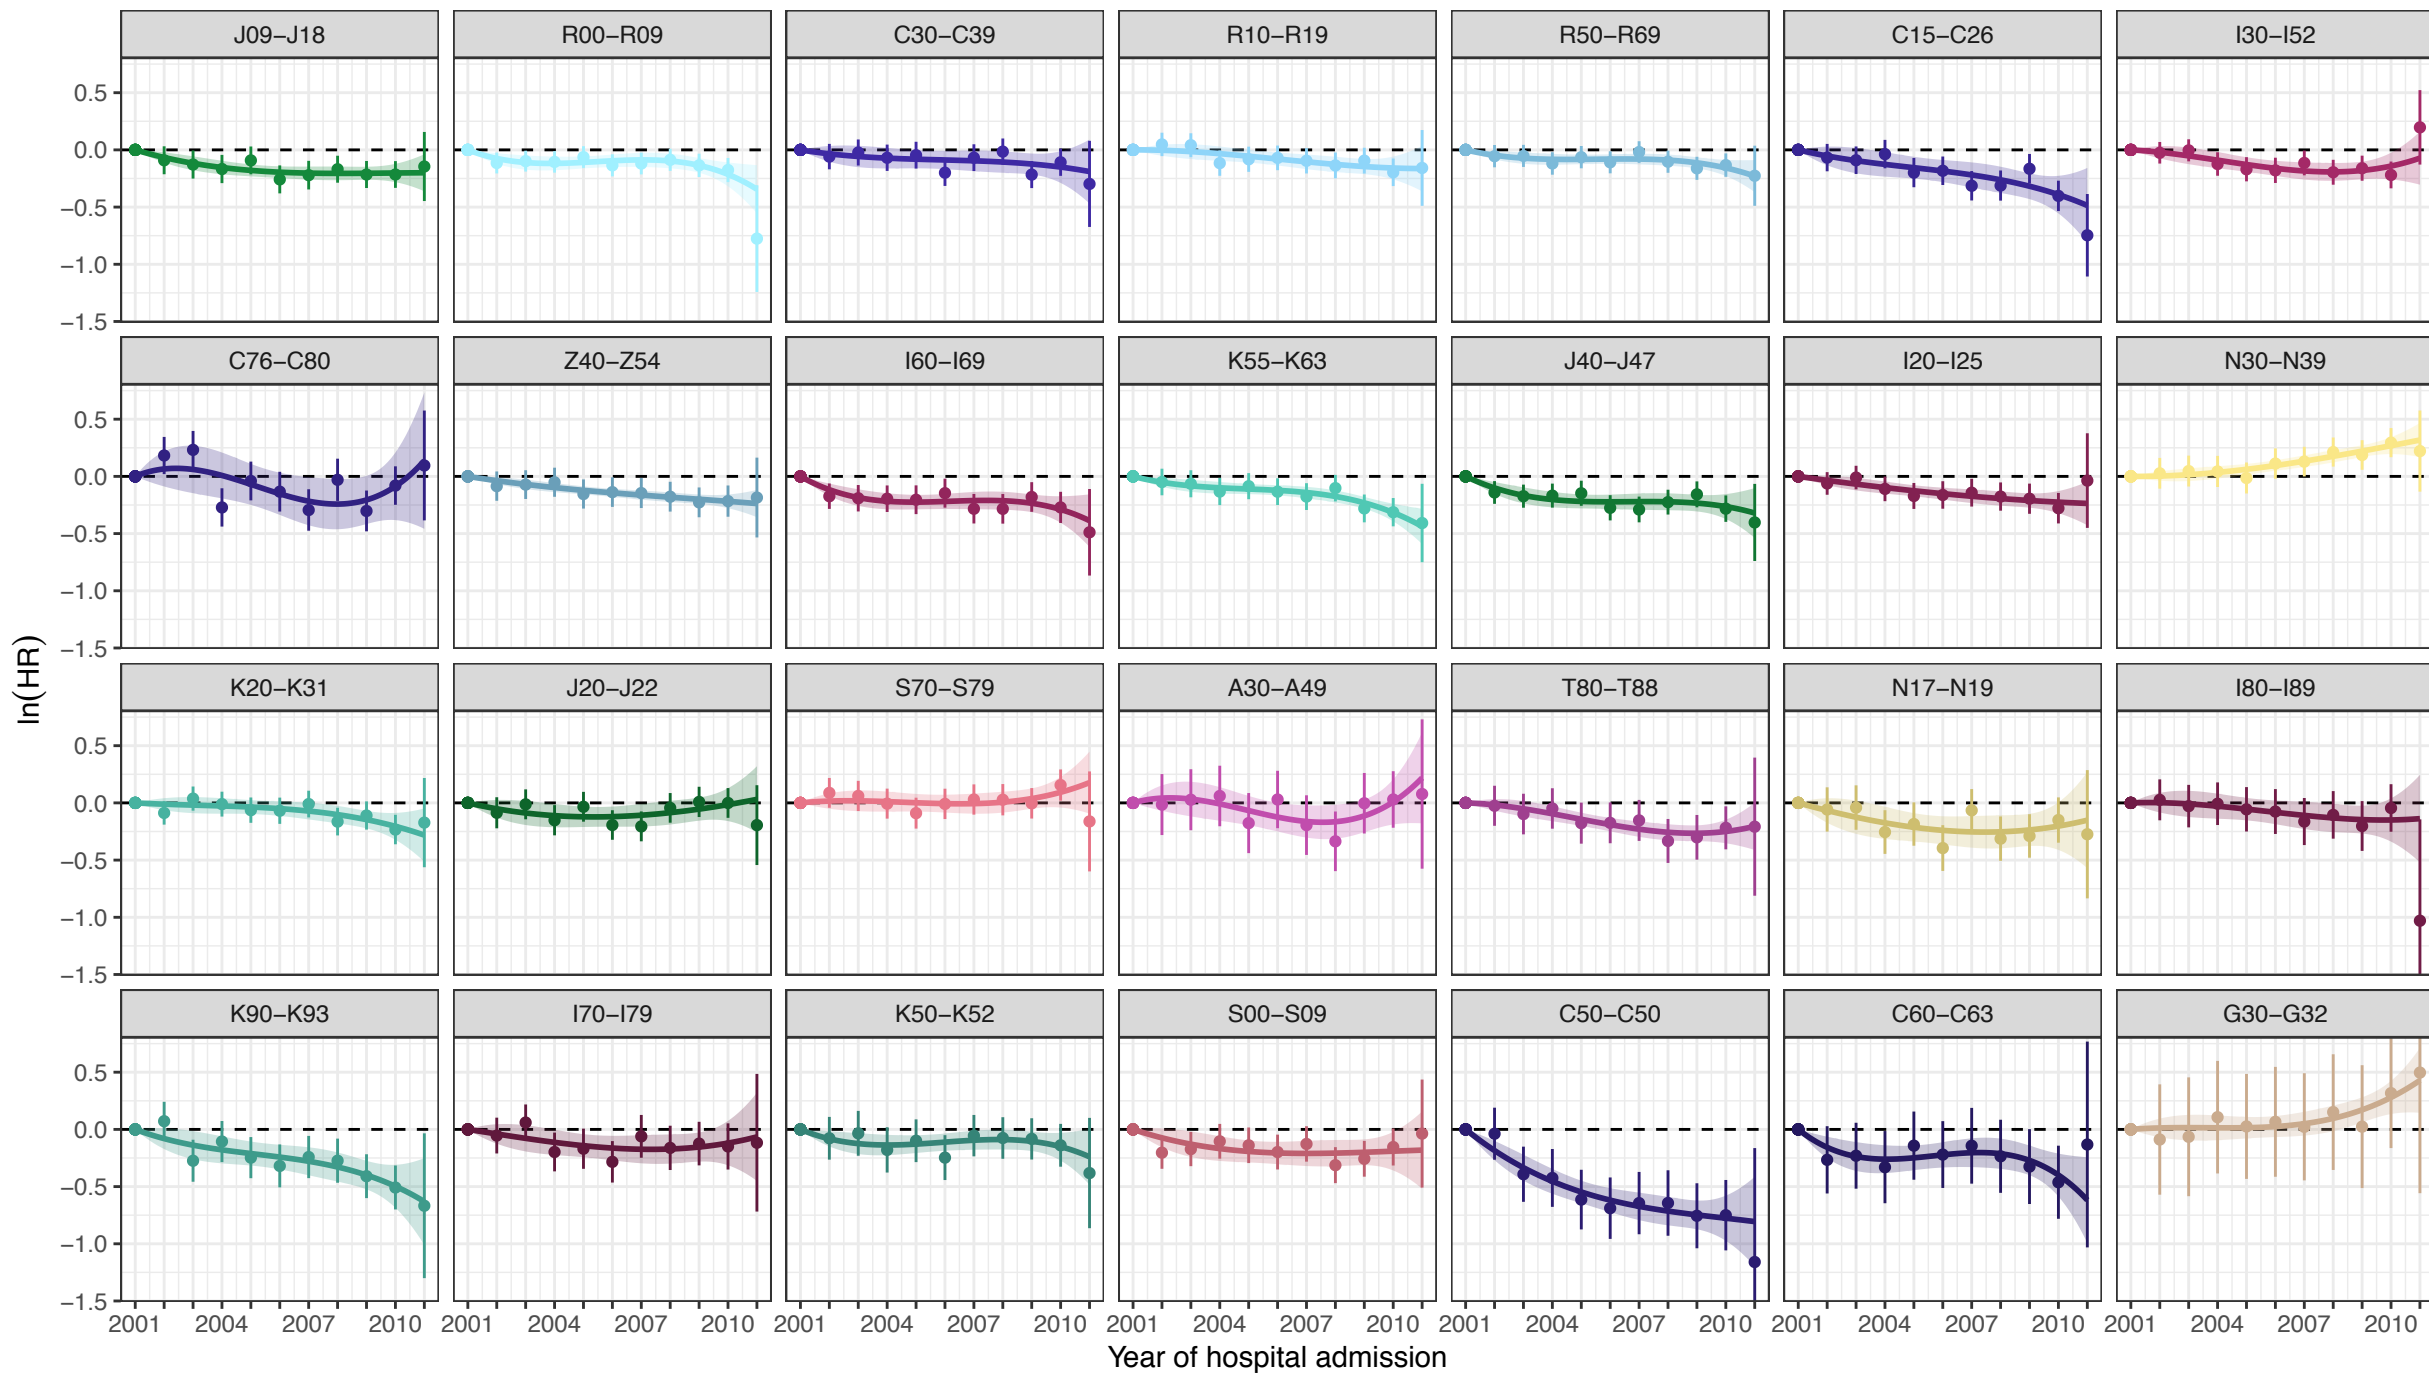

Supplement: Supplementary file [file 19003012-10.pdf]
